# Supplementary material for: Citizen science initiatives document biodiversity baselines at an urban lake
Source: PeerJ. 2024 Apr 17;12:e17209. doi: 10.7717/peerj.17209 (PMC11032101; doi:10.7717/peerj.17209)
Supplement: Supplemental Information 2 — Includes only Research Grade observations from within 100 m of the lake’s shore [file peerj-12-17209-s002.xlsx]

## Sheet: Our study (2021-2022)
OID	to_UTMcm	to_ZoneCm	to_Easting	to_Northin	id	observed_o	time_obser	user_login	quality_gr	latitude	longitude	scientific	common_nam	taxon_id	taxon_king	taxon_phyl	taxon_clas	taxon_orde	taxon_fami	taxon_genu	taxon_spec
48	15T 610295.08mE 4649469.22mN	15T	610295	4.64947e+06	75053646	2021-04-24	2021-04-24 11:27:17 UTC	henry_hoyhtya	research	41.9895	-91.6684	Fulica americana	American Coot	473	Animalia	Chordata	Aves	Gruiformes	Rallidae	Fulica	Fulica americana
77	15T 609889.03mE 4649823.09mN	15T	609889	4.64982e+06	75059742	2021-04-24	2021-04-24 12:16:10 UTC	heerickson	research	41.9928	-91.6733	Fulica americana	American Coot	473	Animalia	Chordata	Aves	Gruiformes	Rallidae	Fulica	Fulica americana
82	15T 609865.80mE 4649874.50mN	15T	609866	4.64987e+06	75060337	2021-04-24	2021-04-24 12:20:13 UTC	ljmosinski	research	41.9932	-91.6736	Fulica americana	American Coot	473	Animalia	Chordata	Aves	Gruiformes	Rallidae	Fulica	Fulica americana
151	15T 609842.30mE 4649924.54mN	15T	609842	4.64992e+06	75091587	2021-04-24	2021-04-24 13:44:39 UTC	igorito	research	41.9937	-91.6738	Fulica americana	American Coot	473	Animalia	Chordata	Aves	Gruiformes	Rallidae	Fulica	Fulica americana
158	15T 609849.06mE 4649907.06mN	15T	609849	4.64991e+06	75108971	2021-04-24	2021-04-24 12:47:23 UTC	kalina_sq	research	41.9935	-91.6737	Fulica americana	American Coot	473	Animalia	Chordata	Aves	Gruiformes	Rallidae	Fulica	Fulica americana
738	15T 609835.19mE 4649937.01mN	15T	609835	4.64994e+06	98405548	2021-10-16	2021-10-16 13:41:11 UTC	gloriamm12	research	41.9938	-91.6739	Fulica americana	American Coot	473	Animalia	Chordata	Aves	Gruiformes	Rallidae	Fulica	Fulica americana
589	15T 610555.16mE 4649796.23mN	15T	610555	4.6498e+06	92834485	2021-08-28	2021-08-28 18:52:39 UTC	dannyhughes	research	41.9924	-91.6652	Streptopelia decaocto	Eurasian Collared-Dove	2969	Animalia	Chordata	Aves	Columbiformes	Columbidae	Streptopelia	Streptopelia decaocto
623	15T 610427.44mE 4649337.85mN	15T	610427	4.64934e+06	94529824	2021-09-11	2021-09-11 21:19:50 UTC	dannyhughes	research	41.9883	-91.6669	Columba livia	Rock Pigeon	3017	Animalia	Chordata	Aves	Columbiformes	Columbidae	Columba	Columba livia
425	15T 610600.77mE 4649726.17mN	15T	610601	4.64973e+06	86489360	2021-07-10	2021-07-10 19:52:49 UTC	dannyhughes	research	41.9918	-91.6647	Zenaida macroura	Mourning Dove	3454	Animalia	Chordata	Aves	Columbiformes	Columbidae	Zenaida	Zenaida macroura
441	15T 610588.13mE 4649762.57mN	15T	610588	4.64976e+06	86506622	2021-07-10	2021-07-10 21:52:18 UTC	jaclynadams	research	41.9921	-91.6649	Zenaida macroura	Mourning Dove	3454	Animalia	Chordata	Aves	Columbiformes	Columbidae	Zenaida	Zenaida macroura
626	15T 610464.68mE 4649873.20mN	15T	610465	4.64987e+06	94530251	2021-09-11	2021-09-11 20:31:58 UTC	dannyhughes	research	41.9931	-91.6663	Zenaida macroura	Mourning Dove	3454	Animalia	Chordata	Aves	Columbiformes	Columbidae	Zenaida	Zenaida macroura
639	15T 610390.42mE 4649942.99mN	15T	610390	4.64994e+06	94531445	2021-09-11	2021-09-11 18:40:45 UTC	dannyhughes	research	41.9938	-91.6672	Zenaida macroura	Mourning Dove	3454	Animalia	Chordata	Aves	Columbiformes	Columbidae	Zenaida	Zenaida macroura
137	15T 609975.66mE 4650098.44mN	15T	609976	4.6501e+06	75088935	2021-04-24	2021-04-24 13:21:49 UTC	kalina_sq	research	41.9952	-91.6722	Limnodromus griseus	Short-billed Dowitcher	3869	Animalia	Chordata	Aves	Charadriiformes	Scolopacidae	Limnodromus	Limnodromus griseus
146	15T 609776.54mE 4650132.07mN	15T	609777	4.65013e+06	75091049	2021-04-24	2021-04-24 12:56:26 UTC	kalina_sq	research	41.9956	-91.6746	Tringa melanoleuca	Greater Yellowlegs	3892	Animalia	Chordata	Aves	Charadriiformes	Scolopacidae	Tringa	Tringa melanoleuca
424	15T 610456.32mE 4649651.63mN	15T	610456	4.64965e+06	86488845	2021-07-10	2021-07-10 19:54:04 UTC	dannyhughes	research	41.9911	-91.6665	Phalacrocorax auritus	Double-crested Cormorant	4265	Animalia	Chordata	Aves	Suliformes	Phalacrocoracidae	Phalacrocorax	Phalacrocorax auritus
592	15T 610428.08mE 4649689.75mN	15T	610428	4.64969e+06	92835522	2021-08-28	2021-08-28 18:25:10 UTC	dannyhughes	research	41.9915	-91.6668	Phalacrocorax auritus	Double-crested Cormorant	4265	Animalia	Chordata	Aves	Suliformes	Phalacrocoracidae	Phalacrocorax	Phalacrocorax auritus
622	15T 610388.93mE 4649476.79mN	15T	610389	4.64948e+06	94529603	2021-09-11	2021-09-11 21:18:36 UTC	dannyhughes	research	41.9896	-91.6673	Phalacrocorax auritus	Double-crested Cormorant	4265	Animalia	Chordata	Aves	Suliformes	Phalacrocoracidae	Phalacrocorax	Phalacrocorax auritus
630	15T 610168.50mE 4650040.80mN	15T	610168	4.65004e+06	94530674	2021-09-11	2021-09-11 22:13:08 UTC	jaclynadams	research	41.9947	-91.6699	Phalacrocorax auritus	Double-crested Cormorant	4265	Animalia	Chordata	Aves	Suliformes	Phalacrocoracidae	Phalacrocorax	Phalacrocorax auritus
20	15T 610015.00mE 4650089.07mN	15T	610015	4.65009e+06	75050437	2021-04-24	2021-04-24 11:05:53 UTC	janielle_cobler	research	41.9951	-91.6717	Pelecanus erythrorhynchos	American White Pelican	4334	Animalia	Chordata	Aves	Pelecaniformes	Pelecanidae	Pelecanus	Pelecanus erythrorhynchos
22	15T 610026.38mE 4650074.72mN	15T	610026	4.65007e+06	75050738	2021-04-24	2021-04-24 11:12:31 UTC	mackenzie_jones1	research	41.995	-91.6716	Pelecanus erythrorhynchos	American White Pelican	4334	Animalia	Chordata	Aves	Pelecaniformes	Pelecanidae	Pelecanus	Pelecanus erythrorhynchos
23	15T 610049.26mE 4650071.30mN	15T	610049	4.65007e+06	75050760	2021-04-24	2021-04-24 11:12:27 UTC	natalie_prow	research	41.995	-91.6713	Pelecanus erythrorhynchos	American White Pelican	4334	Animalia	Chordata	Aves	Pelecaniformes	Pelecanidae	Pelecanus	Pelecanus erythrorhynchos
92	15T 609985.28mE 4650105.82mN	15T	609985	4.65011e+06	75062193	2021-04-24	2021-04-24 12:30:43 UTC	ljmosinski	research	41.9953	-91.6721	Pelecanus erythrorhynchos	American White Pelican	4334	Animalia	Chordata	Aves	Pelecaniformes	Pelecanidae	Pelecanus	Pelecanus erythrorhynchos
115	15T 609875.60mE 4649988.16mN	15T	609876	4.64999e+06	75067251	2021-04-24	2021-04-24 16:57:27 UTC	samigobeli	research	41.9942	-91.6734	Pelecanus erythrorhynchos	American White Pelican	4334	Animalia	Chordata	Aves	Pelecaniformes	Pelecanidae	Pelecanus	Pelecanus erythrorhynchos
125	15T 610299.01mE 4649458.15mN	15T	610299	4.64946e+06	75083852	2021-04-24	2021-04-24 18:05:11 UTC	glueken	research	41.9894	-91.6684	Pelecanus erythrorhynchos	American White Pelican	4334	Animalia	Chordata	Aves	Pelecaniformes	Pelecanidae	Pelecanus	Pelecanus erythrorhynchos
132	15T 609975.67mE 4650097.83mN	15T	609976	4.6501e+06	75085050	2021-04-24	2021-04-24 13:19:51 UTC	kalina_sq	research	41.9952	-91.6722	Pelecanus erythrorhynchos	American White Pelican	4334	Animalia	Chordata	Aves	Pelecaniformes	Pelecanidae	Pelecanus	Pelecanus erythrorhynchos
152	15T 609775.51mE 4650082.32mN	15T	609776	4.65008e+06	75091758	2021-04-24	2021-04-24 13:40:18 UTC	igorito	research	41.9951	-91.6746	Pelecanus erythrorhynchos	American White Pelican	4334	Animalia	Chordata	Aves	Pelecaniformes	Pelecanidae	Pelecanus	Pelecanus erythrorhynchos
165	15T 609918.16mE 4650054.73mN	15T	609918	4.65005e+06	75131943	2021-04-24	2021-04-25 03:08:26 UTC	shuggins21	research	41.9948	-91.6729	Pelecanus erythrorhynchos	American White Pelican	4334	Animalia	Chordata	Aves	Pelecaniformes	Pelecanidae	Pelecanus	Pelecanus erythrorhynchos
171	15T 609947.10mE 4649966.91mN	15T	609947	4.64997e+06	75489510	2021-04-27	2021-04-27 22:56:30 UTC	samigobeli	research	41.994	-91.6726	Pelecanus erythrorhynchos	American White Pelican	4334	Animalia	Chordata	Aves	Pelecaniformes	Pelecanidae	Pelecanus	Pelecanus erythrorhynchos
607	15T 610047.34mE 4649836.84mN	15T	610047	4.64984e+06	92840760	2021-08-28	2021-08-28 17:16:31 UTC	dannyhughes	research	41.9929	-91.6714	Pelecanus erythrorhynchos	American White Pelican	4334	Animalia	Chordata	Aves	Pelecaniformes	Pelecanidae	Pelecanus	Pelecanus erythrorhynchos
723	15T 609852.69mE 4650046.60mN	15T	609853	4.65005e+06	97482165	2021-08-21	2021-08-21 22:09:00 UTC	emilylarosa	research	41.9948	-91.6737	Pelecanus erythrorhynchos	American White Pelican	4334	Animalia	Chordata	Aves	Pelecaniformes	Pelecanidae	Pelecanus	Pelecanus erythrorhynchos
144	15T 610187.01mE 4650080.38mN	15T	610187	4.65008e+06	75090908	2021-04-24	2021-04-24 14:00:36 UTC	igorito	research	41.995	-91.6696	Cathartes aura	Turkey Vulture	4756	Animalia	Chordata	Aves	Cathartiformes	Cathartidae	Cathartes	Cathartes aura
196	15T 610383.29mE 4649947.37mN	15T	610383	4.64995e+06	78874640	2021-05-15	2021-05-15 18:56:20 UTC	dannyhughes	research	41.9938	-91.6673	Cathartes aura	Turkey Vulture	4756	Animalia	Chordata	Aves	Cathartiformes	Cathartidae	Cathartes	Cathartes aura
597	15T 610199.02mE 4650087.22mN	15T	610199	4.65009e+06	92837404	2021-08-28	2021-08-28 17:33:55 UTC	dannyhughes	research	41.9951	-91.6695	Cathartes aura	Turkey Vulture	4756	Animalia	Chordata	Aves	Cathartiformes	Cathartidae	Cathartes	Cathartes aura
615	15T 609887.48mE 4650096.53mN	15T	609887	4.6501e+06	94508386	2021-09-11	2021-09-11 21:58:08 UTC	dannyhughes	research	41.9952	-91.6733	Cathartes aura	Turkey Vulture	4756	Animalia	Chordata	Aves	Cathartiformes	Cathartidae	Cathartes	Cathartes aura
210	15T 609778.83mE 4650074.08mN	15T	609779	4.65007e+06	78911731	2021-05-15	2021-05-15 16:27:26 UTC	jaclynadams	research	41.995	-91.6746	Charadrius vociferus	Killdeer	4793	Animalia	Chordata	Aves	Charadriiformes	Charadriidae	Charadrius	Charadrius vociferus
415	15T 610513.18mE 4649504.37mN	15T	610513	4.6495e+06	86483230	2021-07-10	2021-07-10 21:42:03 UTC	dannyhughes	research	41.9898	-91.6658	Charadrius vociferus	Killdeer	4793	Animalia	Chordata	Aves	Charadriiformes	Charadriidae	Charadrius	Charadrius vociferus
540	15T 609781.34mE 4650168.08mN	15T	609781	4.65017e+06	92044379	2021-08-21	2021-08-21 22:01:49 UTC	dannyhughes	research	41.9959	-91.6745	Charadrius vociferus	Killdeer	4793	Animalia	Chordata	Aves	Charadriiformes	Charadriidae	Charadrius	Charadrius vociferus
722	15T 609963.75mE 4650035.16mN	15T	609964	4.65004e+06	97482163	2021-08-21	2021-08-21 22:07:00 UTC	emilylarosa	research	41.9947	-91.6723	Charadrius vociferus	Killdeer	4793	Animalia	Chordata	Aves	Charadriiformes	Charadriidae	Charadrius	Charadrius vociferus
466	15T 609766.81mE 4650109.03mN	15T	609767	4.65011e+06	86515698	2021-07-10	2021-07-10 15:56:49 UTC	lyssieahern	research	41.9953	-91.6747	Ardea herodias	Great Blue Heron	4956	Animalia	Chordata	Aves	Pelecaniformes	Ardeidae	Ardea	Ardea herodias
578	15T 609982.82mE 4649998.27mN	15T	609983	4.65e+06	92832635	2021-08-28	2021-08-28 19:46:33 UTC	dannyhughes	research	41.9943	-91.6721	Ardea herodias	Great Blue Heron	4956	Animalia	Chordata	Aves	Pelecaniformes	Ardeidae	Ardea	Ardea herodias
616	15T 610113.45mE 4649969.75mN	15T	610113	4.64997e+06	94529002	2021-09-11	2021-09-11 21:56:44 UTC	dannyhughes	research	41.994	-91.6705	Ardea herodias	Great Blue Heron	4956	Animalia	Chordata	Aves	Pelecaniformes	Ardeidae	Ardea	Ardea herodias
672	15T 610042.08mE 4649552.26mN	15T	610042	4.64955e+06	96137096	2021-09-25	2021-09-25 15:05:10 UTC	laurvelez	research	41.9903	-91.6715	Ardea herodias	Great Blue Heron	4956	Animalia	Chordata	Aves	Pelecaniformes	Ardeidae	Ardea	Ardea herodias
763	15T 610448.83mE 4649982.47mN	15T	610449	4.64998e+06	98436743	2021-10-16	2021-10-16 19:01:35 UTC	dannyhughes	research	41.9941	-91.6665	Buteo jamaicensis	Red-tailed Hawk	5212	Animalia	Chordata	Aves	Accipitriformes	Accipitridae	Buteo	Buteo jamaicensis
5	15T 610589.29mE 4649696.38mN	15T	610589	4.6497e+06	73794047	2021-04-05	2021-04-05 22:28:00 UTC	dannyhughes	research	41.9915	-91.6649	Anas platyrhynchos	Mallard	6930	Animalia	Chordata	Aves	Anseriformes	Anatidae	Anas	Anas platyrhynchos
7	15T 610311.47mE 4650046.28mN	15T	610311	4.65005e+06	74943111	2021-04-23	2021-04-23 11:46:06 UTC	peytynshevchuk	research	41.9947	-91.6681	Anas platyrhynchos	Mallard	6930	Animalia	Chordata	Aves	Anseriformes	Anatidae	Anas	Anas platyrhynchos
31	15T 609777.91mE 4650150.79mN	15T	609778	4.65015e+06	75051639	2021-04-24	2021-04-24 11:19:38 UTC	natalie_prow	research	41.9957	-91.6746	Anas platyrhynchos	Mallard	6930	Animalia	Chordata	Aves	Anseriformes	Anatidae	Anas	Anas platyrhynchos
32	15T 609780.92mE 4650136.19mN	15T	609781	4.65014e+06	75051658	2021-04-24	2021-04-24 11:19:43 UTC	mackenzie_jones1	research	41.9956	-91.6745	Anas platyrhynchos	Mallard	6930	Animalia	Chordata	Aves	Anseriformes	Anatidae	Anas	Anas platyrhynchos
46	15T 610067.28mE 4649516.85mN	15T	610067	4.64952e+06	75053262	2021-04-24	2021-04-24 11:30:53 UTC	natalie_prow	research	41.99	-91.6712	Anas platyrhynchos	Mallard	6930	Animalia	Chordata	Aves	Anseriformes	Anatidae	Anas	Anas platyrhynchos
52	15T 609964.97mE 4649610.73mN	15T	609965	4.64961e+06	75054869	2021-04-24	2021-04-24 11:41:13 UTC	henry_hoyhtya	research	41.9908	-91.6724	Anas platyrhynchos	Mallard	6930	Animalia	Chordata	Aves	Anseriformes	Anatidae	Anas	Anas platyrhynchos
57	15T 610325.50mE 4650101.60mN	15T	610326	4.6501e+06	75055340	2021-04-24	2021-04-24 11:45:24 UTC	heerickson	research	41.9952	-91.668	Anas platyrhynchos	Mallard	6930	Animalia	Chordata	Aves	Anseriformes	Anatidae	Anas	Anas platyrhynchos
70	15T 609956.04mE 4649642.18mN	15T	609956	4.64964e+06	75057775	2021-04-24	2021-04-24 16:58:33 UTC	cjmaldonado	research	41.9911	-91.6725	Anas platyrhynchos	Mallard	6930	Animalia	Chordata	Aves	Anseriformes	Anatidae	Anas	Anas platyrhynchos
78	15T 609959.94mE 4649630.79mN	15T	609960	4.64963e+06	75059827	2021-04-24	2021-04-24 12:16:23 UTC	ljmosinski	research	41.991	-91.6725	Anas platyrhynchos	Mallard	6930	Animalia	Chordata	Aves	Anseriformes	Anatidae	Anas	Anas platyrhynchos
87	15T 609933.32mE 4649711.86mN	15T	609933	4.64971e+06	75061962	2021-04-24	2021-04-24 12:28:36 UTC	kalina_sq	research	41.9917	-91.6728	Anas platyrhynchos	Mallard	6930	Animalia	Chordata	Aves	Anseriformes	Anatidae	Anas	Anas platyrhynchos
89	15T 610058.65mE 4650077.47mN	15T	610059	4.65008e+06	75062084	2021-04-24	2021-04-24 12:33:30 UTC	peculiar	research	41.995	-91.6712	Anas platyrhynchos	Mallard	6930	Animalia	Chordata	Aves	Anseriformes	Anatidae	Anas	Anas platyrhynchos
90	15T 610062.98mE 4650067.41mN	15T	610063	4.65007e+06	75062102	2021-04-24	2021-04-24 12:33:37 UTC	ckeller2020	research	41.9949	-91.6711	Anas platyrhynchos	Mallard	6930	Animalia	Chordata	Aves	Anseriformes	Anatidae	Anas	Anas platyrhynchos
91	15T 610055.87mE 4650077.91mN	15T	610056	4.65008e+06	75062161	2021-04-24	2021-04-24 12:33:27 UTC	blyons20	research	41.995	-91.6712	Anas platyrhynchos	Mallard	6930	Animalia	Chordata	Aves	Anseriformes	Anatidae	Anas	Anas platyrhynchos
105	15T 609992.60mE 4650093.93mN	15T	609993	4.65009e+06	75063843	2021-04-24	2021-04-24 12:45:47 UTC	henry_hoyhtya	research	41.9952	-91.672	Anas platyrhynchos	Mallard	6930	Animalia	Chordata	Aves	Anseriformes	Anatidae	Anas	Anas platyrhynchos
111	15T 609979.02mE 4650071.84mN	15T	609979	4.65007e+06	75066064	2021-04-24	2021-04-24 17:12:51 UTC	samigobeli	research	41.995	-91.6722	Anas platyrhynchos	Mallard	6930	Animalia	Chordata	Aves	Anseriformes	Anatidae	Anas	Anas platyrhynchos
112	15T 609977.69mE 4650063.19mN	15T	609978	4.65006e+06	75066266	2021-04-24	2021-04-24 17:12:50 UTC	samigobeli	research	41.9949	-91.6722	Anas platyrhynchos	Mallard	6930	Animalia	Chordata	Aves	Anseriformes	Anatidae	Anas	Anas platyrhynchos
166	15T 609960.94mE 4649765.68mN	15T	609961	4.64977e+06	75476412	2021-04-24	2021-04-24 16:39:42 UTC	samigobeli	research	41.9922	-91.6724	Anas platyrhynchos	Mallard	6930	Animalia	Chordata	Aves	Anseriformes	Anatidae	Anas	Anas platyrhynchos
170	15T 610359.02mE 4650005.02mN	15T	610359	4.65001e+06	75489332	2021-04-27	2021-04-27 23:37:20 UTC	samigobeli	research	41.9943	-91.6676	Anas platyrhynchos	Mallard	6930	Animalia	Chordata	Aves	Anseriformes	Anatidae	Anas	Anas platyrhynchos
175	15T 610286.99mE 4649551.81mN	15T	610287	4.64955e+06	76269088	2021-04-28	2021-04-28 23:50:14 UTC	delaney_throckmorton	research	41.9903	-91.6685	Anas platyrhynchos	Mallard	6930	Animalia	Chordata	Aves	Anseriformes	Anatidae	Anas	Anas platyrhynchos
187	15T 610002.87mE 4650095.00mN	15T	610003	4650095	78852487	2021-05-15	2021-05-15 16:35:34 UTC	yellowamv	research	41.9952	-91.6719	Anas platyrhynchos	Mallard	6930	Animalia	Chordata	Aves	Anseriformes	Anatidae	Anas	Anas platyrhynchos
208	15T 610447.04mE 4649468.59mN	15T	610447	4.64947e+06	78911028	2021-05-15	2021-05-15 16:43:26 UTC	jaclynadams	research	41.9895	-91.6666	Anas platyrhynchos	Mallard	6930	Animalia	Chordata	Aves	Anseriformes	Anatidae	Anas	Anas platyrhynchos
219	15T 609774.68mE 4650091.38mN	15T	609775	4.65009e+06	80437084	2021-05-26	2021-05-26 14:04:45 UTC	lyssieahern	research	41.9952	-91.6746	Anas platyrhynchos	Mallard	6930	Animalia	Chordata	Aves	Anseriformes	Anatidae	Anas	Anas platyrhynchos
220	15T 609821.27mE 4649980.67mN	15T	609821	4.64998e+06	80437299	2021-05-26	2021-05-26 14:07:31 UTC	lyssieahern	research	41.9942	-91.6741	Anas platyrhynchos	Mallard	6930	Animalia	Chordata	Aves	Anseriformes	Anatidae	Anas	Anas platyrhynchos
230	15T 609839.66mE 4650075.68mN	15T	609840	4.65008e+06	80677081	2021-05-28	2021-05-28 21:53:35 UTC	dannyhughes	research	41.995	-91.6738	Anas platyrhynchos	Mallard	6930	Animalia	Chordata	Aves	Anseriformes	Anatidae	Anas	Anas platyrhynchos
246	15T 609938.94mE 4650050.06mN	15T	609939	4.65005e+06	80816965	2021-05-29	2021-05-29 16:14:27 UTC	lyssieahern	research	41.9948	-91.6726	Anas platyrhynchos	Mallard	6930	Animalia	Chordata	Aves	Anseriformes	Anatidae	Anas	Anas platyrhynchos
273	15T 610295.74mE 4650042.78mN	15T	610296	4.65004e+06	82623011	2021-06-11	2021-06-11 22:40:34 UTC	dannyhughes	research	41.9947	-91.6683	Anas platyrhynchos	Mallard	6930	Animalia	Chordata	Aves	Anseriformes	Anatidae	Anas	Anas platyrhynchos
353	15T 609777.45mE 4650117.89mN	15T	609777	4.65012e+06	84630526	2021-06-26	2021-06-26 16:35:13 UTC	lyssieahern	research	41.9954	-91.6746	Anas platyrhynchos	Mallard	6930	Animalia	Chordata	Aves	Anseriformes	Anatidae	Anas	Anas platyrhynchos
404	15T 609854.80mE 4650039.86mN	15T	609855	4.65004e+06	86236490	2021-07-08	2021-07-08 21:34:15 UTC	nikki116	research	41.9947	-91.6737	Anas platyrhynchos	Mallard	6930	Animalia	Chordata	Aves	Anseriformes	Anatidae	Anas	Anas platyrhynchos
414	15T 610526.24mE 4649563.15mN	15T	610526	4.64956e+06	86483003	2021-07-10	2021-07-10 21:42:56 UTC	dannyhughes	research	41.9903	-91.6656	Anas platyrhynchos	Mallard	6930	Animalia	Chordata	Aves	Anseriformes	Anatidae	Anas	Anas platyrhynchos
446	15T 610499.03mE 4649611.70mN	15T	610499	4.64961e+06	86507971	2021-07-10	2021-07-10 21:43:53 UTC	jaclynadams	research	41.9908	-91.666	Anas platyrhynchos	Mallard	6930	Animalia	Chordata	Aves	Anseriformes	Anatidae	Anas	Anas platyrhynchos
474	15T 610286.99mE 4649551.81mN	15T	610287	4.64955e+06	87063465	2021-07-10	2021-07-10 14:34:33 UTC	ashna_k	research	41.9903	-91.6685	Anas platyrhynchos	Mallard	6930	Animalia	Chordata	Aves	Anseriformes	Anatidae	Anas	Anas platyrhynchos
495	15T 609765.40mE 4650138.49mN	15T	609765	4.65014e+06	88490159	2021-07-24	2021-07-24 16:06:07 UTC	laurvelez	research	41.9956	-91.6747	Anas platyrhynchos	Mallard	6930	Animalia	Chordata	Aves	Anseriformes	Anatidae	Anas	Anas platyrhynchos
534	15T 610277.87mE 4650018.40mN	15T	610278	4.65002e+06	92043523	2021-08-21	2021-08-21 21:31:14 UTC	samigobeli	research	41.9945	-91.6686	Anas platyrhynchos	Mallard	6930	Animalia	Chordata	Aves	Anseriformes	Anatidae	Anas	Anas platyrhynchos
557	15T 610300.57mE 4650028.79mN	15T	610301	4.65003e+06	92048530	2021-08-21	2021-08-21 19:18:16 UTC	dannyhughes	research	41.9945	-91.6683	Anas platyrhynchos	Mallard	6930	Animalia	Chordata	Aves	Anseriformes	Anatidae	Anas	Anas platyrhynchos
608	15T 609833.18mE 4650033.30mN	15T	609833	4.65003e+06	92841034	2021-08-28	2021-08-28 19:48:46 UTC	dannyhughes	research	41.9947	-91.6739	Anas platyrhynchos	Mallard	6930	Animalia	Chordata	Aves	Anseriformes	Anatidae	Anas	Anas platyrhynchos
617	15T 609850.95mE 4649983.91mN	15T	609851	4.64998e+06	94529058	2021-09-11	2021-09-11 21:56:55 UTC	dannyhughes	research	41.9942	-91.6737	Anas platyrhynchos	Mallard	6930	Animalia	Chordata	Aves	Anseriformes	Anatidae	Anas	Anas platyrhynchos
632	15T 609775.67mE 4650147.48mN	15T	609776	4.65015e+06	94530820	2021-09-11	2021-09-11 22:01:05 UTC	jaclynadams	research	41.9957	-91.6746	Anas platyrhynchos	Mallard	6930	Animalia	Chordata	Aves	Anseriformes	Anatidae	Anas	Anas platyrhynchos
659	15T 609846.70mE 4649895.03mN	15T	609847	4.6499e+06	96127893	2021-09-25	2021-09-25 14:39:44 UTC	bianca361	research	41.9934	-91.6738	Anas platyrhynchos	Mallard	6930	Animalia	Chordata	Aves	Anseriformes	Anatidae	Anas	Anas platyrhynchos
673	15T 610481.46mE 4649508.75mN	15T	610481	4.64951e+06	96137200	2021-09-25	2021-09-25 15:15:05 UTC	laurvelez	research	41.9898	-91.6662	Anas platyrhynchos	Mallard	6930	Animalia	Chordata	Aves	Anseriformes	Anatidae	Anas	Anas platyrhynchos
712	15T 610551.15mE 4649706.41mN	15T	610551	4.64971e+06	96613154	2021-09-28	2021-09-28 12:02:54 UTC	mknoche	research	41.9916	-91.6653	Anas platyrhynchos	Mallard	6930	Animalia	Chordata	Aves	Anseriformes	Anatidae	Anas	Anas platyrhynchos
716	15T 610496.43mE 4649801.00mN	15T	610496	4649801	97482142	2021-08-21	2021-08-21 21:27:00 UTC	emilylarosa	research	41.9925	-91.666	Anas platyrhynchos	Mallard	6930	Animalia	Chordata	Aves	Anseriformes	Anatidae	Anas	Anas platyrhynchos
724	15T 609963.07mE 4650021.86mN	15T	609963	4.65002e+06	97482166	2021-08-21	2021-08-21 22:13:00 UTC	emilylarosa	research	41.9945	-91.6724	Anas platyrhynchos	Mallard	6930	Animalia	Chordata	Aves	Anseriformes	Anatidae	Anas	Anas platyrhynchos
739	15T 609914.38mE 4649810.24mN	15T	609914	4.64981e+06	98405745	2021-10-16	2021-10-16 13:43:19 UTC	gloriamm12	research	41.9926	-91.673	Anas platyrhynchos	Mallard	6930	Animalia	Chordata	Aves	Anseriformes	Anatidae	Anas	Anas platyrhynchos
740	15T 609882.47mE 4649818.18mN	15T	609882	4.64982e+06	98405841	2021-10-16	2021-10-16 13:43:13 UTC	mknoche	research	41.9927	-91.6734	Anas platyrhynchos	Mallard	6930	Animalia	Chordata	Aves	Anseriformes	Anatidae	Anas	Anas platyrhynchos
749	15T 609774.71mE 4650091.25mN	15T	609775	4.65009e+06	98417934	2021-10-16	2021-10-16 15:44:47 UTC	faithresnick	research	41.9952	-91.6746	Anas platyrhynchos	Mallard	6930	Animalia	Chordata	Aves	Anseriformes	Anatidae	Anas	Anas platyrhynchos
785	15T 610000.88mE 4649741.84mN	15T	610001	4.64974e+06	98665702	2021-08-21	2021-08-21 22:37:00 UTC	emilylarosa	research	41.992	-91.6719	Anas platyrhynchos	Mallard	6930	Animalia	Chordata	Aves	Anseriformes	Anatidae	Anas	Anas platyrhynchos
4	15T 610489.69mE 4649543.42mN	15T	610490	4.64954e+06	73794046	2021-04-05	2021-04-05 22:11:00 UTC	dannyhughes	research	41.9902	-91.6661	Branta canadensis	Canada Goose	7089	Animalia	Chordata	Aves	Anseriformes	Anatidae	Branta	Branta canadensis
12	15T 610011.62mE 4650107.12mN	15T	610012	4.65011e+06	74944133	2021-04-23	2021-04-23 11:55:49 UTC	peytynshevchuk	research	41.9953	-91.6718	Branta canadensis	Canada Goose	7089	Animalia	Chordata	Aves	Anseriformes	Anatidae	Branta	Branta canadensis
13	15T 609897.52mE 4650117.06mN	15T	609898	4.65012e+06	74945021	2021-04-23	2021-04-23 12:03:09 UTC	peytynshevchuk	research	41.9954	-91.6731	Branta canadensis	Canada Goose	7089	Animalia	Chordata	Aves	Anseriformes	Anatidae	Branta	Branta canadensis
15	15T 610089.87mE 4649514.35mN	15T	610090	4.64951e+06	74946208	2021-04-23	2021-04-23 12:16:02 UTC	peytynshevchuk	research	41.9899	-91.6709	Branta canadensis	Canada Goose	7089	Animalia	Chordata	Aves	Anseriformes	Anatidae	Branta	Branta canadensis
21	15T 610542.94mE 4649786.11mN	15T	610543	4.64979e+06	75050665	2021-04-24	2021-04-24 16:11:20 UTC	samigobeli	research	41.9923	-91.6654	Branta canadensis	Canada Goose	7089	Animalia	Chordata	Aves	Anseriformes	Anatidae	Branta	Branta canadensis
26	15T 610508.31mE 4649576.76mN	15T	610508	4.64958e+06	75051208	2021-04-24	2021-04-24 11:12:56 UTC	henry_hoyhtya	research	41.9905	-91.6659	Branta canadensis	Canada Goose	7089	Animalia	Chordata	Aves	Anseriformes	Anatidae	Branta	Branta canadensis
38	15T 609780.21mE 4650083.24mN	15T	609780	4.65008e+06	75051884	2021-04-24	2021-04-24 11:21:27 UTC	natalie_prow	research	41.9951	-91.6745	Branta canadensis	Canada Goose	7089	Animalia	Chordata	Aves	Anseriformes	Anatidae	Branta	Branta canadensis
39	15T 610564.11mE 4649713.64mN	15T	610564	4.64971e+06	75051887	2021-04-24	2021-04-24 11:12:08 UTC	kalina_sq	research	41.9917	-91.6652	Branta canadensis	Canada Goose	7089	Animalia	Chordata	Aves	Anseriformes	Anatidae	Branta	Branta canadensis
40	15T 609777.26mE 4650072.32mN	15T	609777	4.65007e+06	75051907	2021-04-24	2021-04-24 11:21:38 UTC	mackenzie_jones1	research	41.995	-91.6746	Branta canadensis	Canada Goose	7089	Animalia	Chordata	Aves	Anseriformes	Anatidae	Branta	Branta canadensis
41	15T 609997.62mE 4649565.53mN	15T	609998	4.64957e+06	75052517	2021-04-24	2021-04-24 11:25:13 UTC	heerickson	research	41.9904	-91.672	Branta canadensis	Canada Goose	7089	Animalia	Chordata	Aves	Anseriformes	Anatidae	Branta	Branta canadensis
45	15T 610515.47mE 4649600.59mN	15T	610515	4.6496e+06	75053206	2021-04-24	2021-04-24 11:24:52 UTC	kalina_sq	research	41.9907	-91.6658	Branta canadensis	Canada Goose	7089	Animalia	Chordata	Aves	Anseriformes	Anatidae	Branta	Branta canadensis
54	15T 610513.43mE 4649594.19mN	15T	610513	4.64959e+06	75054924	2021-04-24	2021-04-24 11:42:54 UTC	natalie_prow	research	41.9906	-91.6658	Branta canadensis	Canada Goose	7089	Animalia	Chordata	Aves	Anseriformes	Anatidae	Branta	Branta canadensis
55	15T 610512.62mE 4649593.82mN	15T	610513	4.64959e+06	75054948	2021-04-24	2021-04-24 11:43:11 UTC	mackenzie_jones1	research	41.9906	-91.6658	Branta canadensis	Canada Goose	7089	Animalia	Chordata	Aves	Anseriformes	Anatidae	Branta	Branta canadensis
58	15T 609885.51mE 4649797.38mN	15T	609886	4.6498e+06	75055389	2021-04-24	2021-04-24 11:45:07 UTC	henry_hoyhtya	research	41.9925	-91.6733	Branta canadensis	Canada Goose	7089	Animalia	Chordata	Aves	Anseriformes	Anatidae	Branta	Branta canadensis
62	15T 610599.06mE 4649709.83mN	15T	610599	4.64971e+06	75056175	2021-04-24	2021-04-24 11:51:32 UTC	ljmosinski	research	41.9916	-91.6647	Branta canadensis	Canada Goose	7089	Animalia	Chordata	Aves	Anseriformes	Anatidae	Branta	Branta canadensis
64	15T 609890.36mE 4650122.17mN	15T	609890	4.65012e+06	75056773	2021-04-24	2021-04-24 11:56:00 UTC	heerickson	research	41.9954	-91.6732	Branta canadensis	Canada Goose	7089	Animalia	Chordata	Aves	Anseriformes	Anatidae	Branta	Branta canadensis
69	15T 610151.31mE 4649490.10mN	15T	610151	4.64949e+06	75057593	2021-04-24	2021-04-24 16:52:01 UTC	cjmaldonado	research	41.9897	-91.6702	Branta canadensis	Canada Goose	7089	Animalia	Chordata	Aves	Anseriformes	Anatidae	Branta	Branta canadensis
72	15T 609987.05mE 4650111.10mN	15T	609987	4.65011e+06	75058401	2021-04-24	2021-04-24 12:07:05 UTC	ckeller2020	research	41.9953	-91.672	Branta canadensis	Canada Goose	7089	Animalia	Chordata	Aves	Anseriformes	Anatidae	Branta	Branta canadensis
79	15T 609852.48mE 4650085.88mN	15T	609852	4.65009e+06	75060027	2021-04-24	2021-04-24 12:17:40 UTC	henry_hoyhtya	research	41.9951	-91.6737	Branta canadensis	Canada Goose	7089	Animalia	Chordata	Aves	Anseriformes	Anatidae	Branta	Branta canadensis
80	15T 609889.21mE 4650116.45mN	15T	609889	4.65012e+06	75060140	2021-04-24	2021-04-24 12:18:22 UTC	peculiar	research	41.9954	-91.6732	Branta canadensis	Canada Goose	7089	Animalia	Chordata	Aves	Anseriformes	Anatidae	Branta	Branta canadensis
81	15T 609887.68mE 4650122.11mN	15T	609888	4.65012e+06	75060293	2021-04-24	2021-04-24 12:19:21 UTC	blyons20	research	41.9954	-91.6732	Branta canadensis	Canada Goose	7089	Animalia	Chordata	Aves	Anseriformes	Anatidae	Branta	Branta canadensis
84	15T 610495.95mE 4649568.46mN	15T	610496	4.64957e+06	75061775	2021-04-24	2021-04-24 12:31:25 UTC	heerickson	research	41.9904	-91.666	Branta canadensis	Canada Goose	7089	Animalia	Chordata	Aves	Anseriformes	Anatidae	Branta	Branta canadensis
88	15T 610030.36mE 4650082.06mN	15T	610030	4.65008e+06	75062023	2021-04-24	2021-04-24 12:31:43 UTC	peculiar	research	41.9951	-91.6715	Branta canadensis	Canada Goose	7089	Animalia	Chordata	Aves	Anseriformes	Anatidae	Branta	Branta canadensis
96	15T 610286.99mE 4649551.81mN	15T	610287	4.64955e+06	75062663	2021-04-24	2021-04-24 07:09:31 UTC	ashna_k	research	41.9903	-91.6685	Branta canadensis	Canada Goose	7089	Animalia	Chordata	Aves	Anseriformes	Anatidae	Branta	Branta canadensis
109	15T 609944.25mE 4650107.39mN	15T	609944	4.65011e+06	75065263	2021-04-24	2021-04-24 17:14:14 UTC	samigobeli	research	41.9953	-91.6726	Branta canadensis	Canada Goose	7089	Animalia	Chordata	Aves	Anseriformes	Anatidae	Branta	Branta canadensis
110	15T 609911.60mE 4650085.08mN	15T	609912	4.65009e+06	75065373	2021-04-24	2021-04-24 17:14:03 UTC	samigobeli	research	41.9951	-91.673	Branta canadensis	Canada Goose	7089	Animalia	Chordata	Aves	Anseriformes	Anatidae	Branta	Branta canadensis
113	15T 609919.99mE 4650070.76mN	15T	609920	4.65007e+06	75066864	2021-04-24	2021-04-24 17:11:12 UTC	samigobeli	research	41.995	-91.6729	Branta canadensis	Canada Goose	7089	Animalia	Chordata	Aves	Anseriformes	Anatidae	Branta	Branta canadensis
127	15T 610515.65mE 4649592.02mN	15T	610516	4.64959e+06	75084098	2021-04-24	2021-04-24 17:46:54 UTC	glueken	research	41.9906	-91.6658	Branta canadensis	Canada Goose	7089	Animalia	Chordata	Aves	Anseriformes	Anatidae	Branta	Branta canadensis
128	15T 610525.55mE 4649795.72mN	15T	610526	4.6498e+06	75084212	2021-04-24	2021-04-24 13:41:11 UTC	kalina_sq	research	41.9924	-91.6656	Branta canadensis	Canada Goose	7089	Animalia	Chordata	Aves	Anseriformes	Anatidae	Branta	Branta canadensis
141	15T 610286.99mE 4649551.81mN	15T	610287	4.64955e+06	75090276	2021-04-24	2021-04-24 11:36:15 UTC	ashna_k	research	41.9903	-91.6685	Branta canadensis	Canada Goose	7089	Animalia	Chordata	Aves	Anseriformes	Anatidae	Branta	Branta canadensis
148	15T 610286.99mE 4649551.81mN	15T	610287	4.64955e+06	75091191	2021-04-24	2021-04-24 11:43:41 UTC	ashna_k	research	41.9903	-91.6685	Branta canadensis	Canada Goose	7089	Animalia	Chordata	Aves	Anseriformes	Anatidae	Branta	Branta canadensis
149	15T 610286.99mE 4649551.81mN	15T	610287	4.64955e+06	75091374	2021-04-24	2021-04-24 11:44:48 UTC	ashna_k	research	41.9903	-91.6685	Branta canadensis	Canada Goose	7089	Animalia	Chordata	Aves	Anseriformes	Anatidae	Branta	Branta canadensis
154	15T 610372.22mE 4649988.67mN	15T	610372	4.64999e+06	75092358	2021-04-24	2021-04-24 13:21:51 UTC	igorito	research	41.9942	-91.6674	Branta canadensis	Canada Goose	7089	Animalia	Chordata	Aves	Anseriformes	Anatidae	Branta	Branta canadensis
161	15T 609884.24mE 4650069.20mN	15T	609884	4.65007e+06	75131754	2021-04-24	2021-04-24 16:11:42 UTC	shuggins21	research	41.995	-91.6733	Branta canadensis	Canada Goose	7089	Animalia	Chordata	Aves	Anseriformes	Anatidae	Branta	Branta canadensis
162	15T 610005.84mE 4650099.22mN	15T	610006	4.6501e+06	75131780	2021-04-24	2021-04-24 16:50:13 UTC	shuggins21	research	41.9952	-91.6718	Branta canadensis	Canada Goose	7089	Animalia	Chordata	Aves	Anseriformes	Anatidae	Branta	Branta canadensis
163	15T 610490.09mE 4649557.56mN	15T	610490	4.64956e+06	75131795	2021-04-24	2021-04-24 17:31:05 UTC	shuggins21	research	41.9903	-91.6661	Branta canadensis	Canada Goose	7089	Animalia	Chordata	Aves	Anseriformes	Anatidae	Branta	Branta canadensis
172	15T 609866.28mE 4649863.68mN	15T	609866	4.64986e+06	75489657	2021-04-27	2021-04-27 23:09:42 UTC	samigobeli	research	41.9931	-91.6736	Branta canadensis	Canada Goose	7089	Animalia	Chordata	Aves	Anseriformes	Anatidae	Branta	Branta canadensis
173	15T 609890.22mE 4650022.04mN	15T	609890	4.65002e+06	75489732	2021-04-27	2021-04-27 23:24:38 UTC	samigobeli	research	41.9945	-91.6732	Branta canadensis	Canada Goose	7089	Animalia	Chordata	Aves	Anseriformes	Anatidae	Branta	Branta canadensis
174	15T 609898.35mE 4649798.50mN	15T	609898	4.6498e+06	75490075	2021-04-27	2021-04-27 23:09:23 UTC	samigobeli	research	41.9925	-91.6732	Branta canadensis	Canada Goose	7089	Animalia	Chordata	Aves	Anseriformes	Anatidae	Branta	Branta canadensis
176	15T 610286.99mE 4649551.81mN	15T	610287	4.64955e+06	76269478	2021-04-28	2021-04-28 23:47:55 UTC	delaney_throckmorton	research	41.9903	-91.6685	Branta canadensis	Canada Goose	7089	Animalia	Chordata	Aves	Anseriformes	Anatidae	Branta	Branta canadensis
186	15T 610060.34mE 4650070.27mN	15T	610060	4.65007e+06	78848970	2021-05-15	2021-05-15 16:10:37 UTC	yellowamv	research	41.995	-91.6712	Branta canadensis	Canada Goose	7089	Animalia	Chordata	Aves	Anseriformes	Anatidae	Branta	Branta canadensis
190	15T 610090.89mE 4649496.09mN	15T	610091	4.6495e+06	78872059	2021-05-15	2021-05-15 18:09:09 UTC	dannyhughes	research	41.9898	-91.6709	Branta canadensis	Canada Goose	7089	Animalia	Chordata	Aves	Anseriformes	Anatidae	Branta	Branta canadensis
194	15T 610310.92mE 4649421.57mN	15T	610311	4.64942e+06	78874102	2021-05-15	2021-05-15 13:15:53 UTC	laurvelez	research	41.9891	-91.6683	Branta canadensis	Canada Goose	7089	Animalia	Chordata	Aves	Anseriformes	Anatidae	Branta	Branta canadensis
199	15T 610151.80mE 4650089.76mN	15T	610152	4.65009e+06	78904558	2021-05-15	2021-05-15 12:41:00 UTC	robbie16	research	41.9951	-91.6701	Branta canadensis	Canada Goose	7089	Animalia	Chordata	Aves	Anseriformes	Anatidae	Branta	Branta canadensis
209	15T 609793.55mE 4650041.88mN	15T	609794	4.65004e+06	78911250	2021-05-15	2021-05-15 16:25:43 UTC	jaclynadams	research	41.9947	-91.6744	Branta canadensis	Canada Goose	7089	Animalia	Chordata	Aves	Anseriformes	Anatidae	Branta	Branta canadensis
212	15T 609981.01mE 4650110.17mN	15T	609981	4.65011e+06	78912524	2021-05-15	2021-05-15 17:13:24 UTC	jaclynadams	research	41.9953	-91.6721	Branta canadensis	Canada Goose	7089	Animalia	Chordata	Aves	Anseriformes	Anatidae	Branta	Branta canadensis
218	15T 609774.95mE 4650145.62mN	15T	609775	4.65015e+06	80436933	2021-05-26	2021-05-26 14:02:53 UTC	lyssieahern	research	41.9957	-91.6746	Branta canadensis	Canada Goose	7089	Animalia	Chordata	Aves	Anseriformes	Anatidae	Branta	Branta canadensis
221	15T 610198.16mE 4649478.43mN	15T	610198	4.64948e+06	80437330	2021-05-26	2021-05-26 14:20:45 UTC	lyssieahern	research	41.9896	-91.6696	Branta canadensis	Canada Goose	7089	Animalia	Chordata	Aves	Anseriformes	Anatidae	Branta	Branta canadensis
242	15T 609989.21mE 4650097.28mN	15T	609989	4.6501e+06	80815827	2021-05-29	2021-05-29 20:52:30 UTC	dannyhughes	research	41.9952	-91.672	Branta canadensis	Canada Goose	7089	Animalia	Chordata	Aves	Anseriformes	Anatidae	Branta	Branta canadensis
245	15T 610015.31mE 4649577.76mN	15T	610015	4.64958e+06	80816679	2021-05-29	2021-05-29 13:29:21 UTC	lyssieahern	research	41.9905	-91.6718	Branta canadensis	Canada Goose	7089	Animalia	Chordata	Aves	Anseriformes	Anatidae	Branta	Branta canadensis
264	15T 610437.18mE 4649426.06mN	15T	610437	4.64943e+06	81772269	2021-06-05	2021-06-05 14:11:54 UTC	lyssieahern	research	41.9891	-91.6667	Branta canadensis	Canada Goose	7089	Animalia	Chordata	Aves	Anseriformes	Anatidae	Branta	Branta canadensis
269	15T 610791.41mE 4649424.18mN	15T	610791	4.64942e+06	81978760	2021-06-06	2021-06-06 12:17:22 UTC	farahsuboh	research	41.989	-91.6625	Branta canadensis	Canada Goose	7089	Animalia	Chordata	Aves	Anseriformes	Anatidae	Branta	Branta canadensis
271	15T 610077.60mE 4649505.80mN	15T	610078	4.64951e+06	81979033	2021-05-29	2021-05-29 16:46:52 UTC	farahsuboh	research	41.9899	-91.6711	Branta canadensis	Canada Goose	7089	Animalia	Chordata	Aves	Anseriformes	Anatidae	Branta	Branta canadensis
303	15T 609778.96mE 4650082.28mN	15T	609779	4.65008e+06	82759182	2021-06-12	2021-06-12 21:21:12 UTC	jaclynadams	research	41.9951	-91.6746	Branta canadensis	Canada Goose	7089	Animalia	Chordata	Aves	Anseriformes	Anatidae	Branta	Branta canadensis
305	15T 610435.44mE 4649602.83mN	15T	610435	4.6496e+06	82759736	2021-06-12	2021-06-12 20:43:06 UTC	dannyhughes	research	41.9907	-91.6667	Branta canadensis	Canada Goose	7089	Animalia	Chordata	Aves	Anseriformes	Anatidae	Branta	Branta canadensis
426	15T 610509.31mE 4649820.34mN	15T	610509	4.64982e+06	86489758	2021-07-10	2021-07-10 19:49:45 UTC	dannyhughes	research	41.9926	-91.6658	Branta canadensis	Canada Goose	7089	Animalia	Chordata	Aves	Anseriformes	Anatidae	Branta	Branta canadensis
452	15T 610479.82mE 4649899.58mN	15T	610480	4.6499e+06	86509874	2021-07-10	2021-07-10 21:37:07 UTC	jaclynadams	research	41.9934	-91.6661	Branta canadensis	Canada Goose	7089	Animalia	Chordata	Aves	Anseriformes	Anatidae	Branta	Branta canadensis
472	15T 610489.75mE 4649880.92mN	15T	610490	4.64988e+06	86516155	2021-07-10	2021-07-10 16:59:05 UTC	lyssieahern	research	41.9932	-91.666	Branta canadensis	Canada Goose	7089	Animalia	Chordata	Aves	Anseriformes	Anatidae	Branta	Branta canadensis
498	15T 609775.48mE 4650084.17mN	15T	609775	4.65008e+06	88500413	2021-07-24	2021-07-24 16:06:44 UTC	lyssieahern	research	41.9951	-91.6746	Branta canadensis	Canada Goose	7089	Animalia	Chordata	Aves	Anseriformes	Anatidae	Branta	Branta canadensis
545	15T 610243.22mE 4649989.86mN	15T	610243	4.64999e+06	92046304	2021-08-21	2021-08-21 21:34:01 UTC	dannyhughes	research	41.9942	-91.669	Branta canadensis	Canada Goose	7089	Animalia	Chordata	Aves	Anseriformes	Anatidae	Branta	Branta canadensis
584	15T 610333.32mE 4649388.15mN	15T	610333	4.64939e+06	92833759	2021-08-28	2021-08-28 19:25:40 UTC	dannyhughes	research	41.9888	-91.668	Branta canadensis	Canada Goose	7089	Animalia	Chordata	Aves	Anseriformes	Anatidae	Branta	Branta canadensis
610	15T 610406.13mE 4649378.12mN	15T	610406	4.64938e+06	94479909	2021-09-11	2021-09-11 14:34:42 UTC	shion2	research	41.9887	-91.6671	Branta canadensis	Canada Goose	7089	Animalia	Chordata	Aves	Anseriformes	Anatidae	Branta	Branta canadensis
618	15T 609961.51mE 4650013.15mN	15T	609962	4.65001e+06	94529108	2021-09-11	2021-09-11 21:55:29 UTC	dannyhughes	research	41.9945	-91.6724	Branta canadensis	Canada Goose	7089	Animalia	Chordata	Aves	Anseriformes	Anatidae	Branta	Branta canadensis
655	15T 610361.21mE 4650006.04mN	15T	610361	4.65001e+06	94533190	2021-09-11	2021-09-11 17:55:48 UTC	dannyhughes	research	41.9943	-91.6675	Branta canadensis	Canada Goose	7089	Animalia	Chordata	Aves	Anseriformes	Anatidae	Branta	Branta canadensis
669	15T 610539.34mE 4649808.58mN	15T	610539	4.64981e+06	96136460	2021-09-25	2021-09-25 15:21:23 UTC	laurvelez	research	41.9925	-91.6654	Branta canadensis	Canada Goose	7089	Animalia	Chordata	Aves	Anseriformes	Anatidae	Branta	Branta canadensis
711	15T 610562.30mE 4649797.28mN	15T	610562	4.6498e+06	96493878	2021-09-28	2021-09-28 12:04:36 UTC	mknoche	research	41.9924	-91.6652	Branta canadensis	Canada Goose	7089	Animalia	Chordata	Aves	Anseriformes	Anatidae	Branta	Branta canadensis
713	15T 609997.01mE 4650098.53mN	15T	609997	4.6501e+06	96613283	2021-09-28	2021-09-28 11:33:05 UTC	mknoche	research	41.9952	-91.6719	Branta canadensis	Canada Goose	7089	Animalia	Chordata	Aves	Anseriformes	Anatidae	Branta	Branta canadensis
714	15T 610395.24mE 4649370.43mN	15T	610395	4.64937e+06	96613932	2021-09-28	2021-09-28 11:55:46 UTC	mknoche	research	41.9886	-91.6673	Branta canadensis	Canada Goose	7089	Animalia	Chordata	Aves	Anseriformes	Anatidae	Branta	Branta canadensis
786	15T 609830.84mE 4650129.45mN	15T	609831	4.65013e+06	98885120	2021-10-16	2021-10-16 15:01:45 UTC	joely98	research	41.9955	-91.6739	Branta canadensis	Canada Goose	7089	Animalia	Chordata	Aves	Anseriformes	Anatidae	Branta	Branta canadensis
340	15T 610546.88mE 4649664.79mN	15T	610547	4.64966e+06	84600908	2021-06-26	2021-06-26 10:03:25 UTC	jane_nesmith	research	41.9912	-91.6654	Aix sponsa	Wood Duck	7107	Animalia	Chordata	Aves	Anseriformes	Anatidae	Aix	Aix sponsa
378	15T 610562.95mE 4649653.21mN	15T	610563	4.64965e+06	84633579	2021-06-26	2021-06-26 19:36:49 UTC	dannyhughes	research	41.9911	-91.6652	Aix sponsa	Wood Duck	7107	Animalia	Chordata	Aves	Anseriformes	Anatidae	Aix	Aix sponsa
579	15T 609835.11mE 4649974.45mN	15T	609835	4.64997e+06	92832735	2021-08-28	2021-08-28 19:41:51 UTC	dannyhughes	research	41.9941	-91.6739	Aix sponsa	Wood Duck	7107	Animalia	Chordata	Aves	Anseriformes	Anatidae	Aix	Aix sponsa
629	15T 610511.35mE 4649649.69mN	15T	610511	4.64965e+06	94530672	2021-09-11	2021-09-11 20:25:57 UTC	dannyhughes	research	41.9911	-91.6658	Aix sponsa	Wood Duck	7107	Animalia	Chordata	Aves	Anseriformes	Anatidae	Aix	Aix sponsa
671	15T 609890.24mE 4649806.82mN	15T	609890	4.64981e+06	96136883	2021-09-25	2021-09-25 14:56:56 UTC	laurvelez	research	41.9926	-91.6733	Aix sponsa	Wood Duck	7107	Animalia	Chordata	Aves	Anseriformes	Anatidae	Aix	Aix sponsa
595	15T 610336.40mE 4650068.07mN	15T	610336	4.65007e+06	92836824	2021-08-28	2021-08-28 17:41:34 UTC	dannyhughes	research	41.9949	-91.6678	Bombycilla cedrorum	Cedar Waxwing	7428	Animalia	Chordata	Aves	Passeriformes	Bombycillidae	Bombycilla	Bombycilla cedrorum
24	15T 609889.78mE 4650109.66mN	15T	609890	4.65011e+06	75050789	2021-04-24	2021-04-24 11:12:32 UTC	janielle_cobler	research	41.9953	-91.6732	Corvus brachyrhynchos	American Crow	8021	Animalia	Chordata	Aves	Passeriformes	Corvidae	Corvus	Corvus brachyrhynchos
642	15T 610382.10mE 4650064.16mN	15T	610382	4.65006e+06	94531802	2021-09-11	2021-09-11 18:34:01 UTC	dannyhughes	research	41.9949	-91.6673	Corvus brachyrhynchos	American Crow	8021	Animalia	Chordata	Aves	Passeriformes	Corvidae	Corvus	Corvus brachyrhynchos
11	15T 610050.95mE 4650098.05mN	15T	610051	4.6501e+06	74943999	2021-04-23	2021-04-23 11:53:59 UTC	peytynshevchuk	research	41.9952	-91.6713	Cardinalis cardinalis	Northern Cardinal	9083	Animalia	Chordata	Aves	Passeriformes	Cardinalidae	Cardinalis	Cardinalis cardinalis
130	15T 610592.71mE 4649679.17mN	15T	610593	4.64968e+06	75084640	2021-04-24	2021-04-24 18:28:03 UTC	dannyhughes	research	41.9914	-91.6648	Cardinalis cardinalis	Northern Cardinal	9083	Animalia	Chordata	Aves	Passeriformes	Cardinalidae	Cardinalis	Cardinalis cardinalis
304	15T 610316.34mE 4650063.77mN	15T	610316	4.65006e+06	82759452	2021-06-12	2021-06-12 20:19:00 UTC	dannyhughes	research	41.9949	-91.6681	Cardinalis cardinalis	Northern Cardinal	9083	Animalia	Chordata	Aves	Passeriformes	Cardinalidae	Cardinalis	Cardinalis cardinalis
436	15T 609863.02mE 4650118.94mN	15T	609863	4.65012e+06	86504710	2021-07-10	2021-07-10 22:27:34 UTC	dannyhughes	research	41.9954	-91.6735	Cardinalis cardinalis	Northern Cardinal	9083	Animalia	Chordata	Aves	Passeriformes	Cardinalidae	Cardinalis	Cardinalis cardinalis
488	15T 609942.87mE 4650166.39mN	15T	609943	4.65017e+06	88442483	2021-07-24	2021-07-24 13:27:01 UTC	laurvelez	research	41.9958	-91.6726	Cardinalis cardinalis	Northern Cardinal	9083	Animalia	Chordata	Aves	Passeriformes	Cardinalidae	Cardinalis	Cardinalis cardinalis
596	15T 610303.15mE 4650055.10mN	15T	610303	4.65006e+06	92836960	2021-08-28	2021-08-28 17:39:50 UTC	dannyhughes	research	41.9948	-91.6682	Cardinalis cardinalis	Northern Cardinal	9083	Animalia	Chordata	Aves	Passeriformes	Cardinalidae	Cardinalis	Cardinalis cardinalis
605	15T 610298.86mE 4650054.08mN	15T	610299	4.65005e+06	92840062	2021-08-28	2021-08-28 17:39:55 UTC	dannyhughes	research	41.9948	-91.6683	Cardinalis cardinalis	Northern Cardinal	9083	Animalia	Chordata	Aves	Passeriformes	Cardinalidae	Cardinalis	Cardinalis cardinalis
625	15T 610449.46mE 4649447.65mN	15T	610449	4.64945e+06	94529954	2021-09-11	2021-09-11 21:14:54 UTC	dannyhughes	research	41.9893	-91.6666	Cardinalis cardinalis	Northern Cardinal	9083	Animalia	Chordata	Aves	Passeriformes	Cardinalidae	Cardinalis	Cardinalis cardinalis
140	15T 609897.05mE 4650092.60mN	15T	609897	4.65009e+06	75090053	2021-04-24	2021-04-24 13:06:26 UTC	kalina_sq	research	41.9952	-91.6731	Melospiza georgiana	Swamp Sparrow	9096	Animalia	Chordata	Aves	Passeriformes	Passerellidae	Melospiza	Melospiza georgiana
43	15T 610487.15mE 4649515.68mN	15T	610487	4.64952e+06	75052787	2021-04-24	2021-04-24 16:20:43 UTC	cjmaldonado	research	41.9899	-91.6661	Melospiza melodia	Song Sparrow	9100	Animalia	Chordata	Aves	Passeriformes	Passerellidae	Melospiza	Melospiza melodia
65	15T 610333.87mE 4649409.27mN	15T	610334	4.64941e+06	75056901	2021-04-24	2021-04-24 11:53:13 UTC	kalina_sq	research	41.989	-91.668	Melospiza melodia	Song Sparrow	9100	Animalia	Chordata	Aves	Passeriformes	Passerellidae	Melospiza	Melospiza melodia
135	15T 610569.64mE 4649674.66mN	15T	610570	4.64967e+06	75085915	2021-04-24	2021-04-24 18:27:23 UTC	dannyhughes	research	41.9913	-91.6651	Melospiza melodia	Song Sparrow	9100	Animalia	Chordata	Aves	Passeriformes	Passerellidae	Melospiza	Melospiza melodia
184	15T 610160.02mE 4649508.02mN	15T	610160	4.64951e+06	78746507	2021-05-14	2021-05-14 19:21:19 UTC	dannyhughes	research	41.9899	-91.6701	Icterus galbula	Baltimore Oriole	9346	Animalia	Chordata	Aves	Passeriformes	Icteridae	Icterus	Icterus galbula
189	15T 610349.05mE 4649997.57mN	15T	610349	4.65e+06	78855280	2021-05-15	2021-05-15 11:43:17 UTC	laurvelez	research	41.9943	-91.6677	Icterus galbula	Baltimore Oriole	9346	Animalia	Chordata	Aves	Passeriformes	Icteridae	Icterus	Icterus galbula
201	15T 609966.28mE 4650125.00mN	15T	609966	4650125	78905905	2021-05-15	2021-05-15 11:59:00 UTC	robbie16	research	41.9955	-91.6723	Icterus galbula	Baltimore Oriole	9346	Animalia	Chordata	Aves	Passeriformes	Icteridae	Icterus	Icterus galbula
53	15T 610515.65mE 4649581.65mN	15T	610516	4.64958e+06	75054908	2021-04-24	2021-04-24 11:42:29 UTC	mackenzie_jones1	research	41.9905	-91.6658	Quiscalus quiscula	Common Grackle	9602	Animalia	Chordata	Aves	Passeriformes	Icteridae	Quiscalus	Quiscalus quiscula
60	15T 610458.50mE 4649446.07mN	15T	610458	4.64945e+06	75055801	2021-04-24	2021-04-24 11:33:23 UTC	kalina_sq	research	41.9893	-91.6665	Quiscalus quiscula	Common Grackle	9602	Animalia	Chordata	Aves	Passeriformes	Icteridae	Quiscalus	Quiscalus quiscula
153	15T 610276.36mE 4650062.14mN	15T	610276	4.65006e+06	75092128	2021-04-24	2021-04-24 13:26:48 UTC	igorito	research	41.9949	-91.6686	Quiscalus quiscula	Common Grackle	9602	Animalia	Chordata	Aves	Passeriformes	Icteridae	Quiscalus	Quiscalus quiscula
215	15T 609992.24mE 4649597.60mN	15T	609992	4.6496e+06	78914868	2021-05-15	2021-05-15 16:29:42 UTC	jaclynadams	research	41.9907	-91.6721	Quiscalus quiscula	Common Grackle	9602	Animalia	Chordata	Aves	Passeriformes	Icteridae	Quiscalus	Quiscalus quiscula
260	15T 609771.71mE 4650113.73mN	15T	609772	4.65011e+06	81771639	2021-06-05	2021-06-05 13:42:52 UTC	lyssieahern	research	41.9954	-91.6746	Quiscalus quiscula	Common Grackle	9602	Animalia	Chordata	Aves	Passeriformes	Icteridae	Quiscalus	Quiscalus quiscula
283	15T 610022.49mE 4650084.14mN	15T	610022	4.65008e+06	82728450	2021-06-12	2021-06-12 14:03:24 UTC	laurvelez	research	41.9951	-91.6716	Quiscalus quiscula	Common Grackle	9602	Animalia	Chordata	Aves	Passeriformes	Icteridae	Quiscalus	Quiscalus quiscula
284	15T 610199.70mE 4650072.61mN	15T	610200	4.65007e+06	82729843	2021-06-12	2021-06-12 14:31:46 UTC	farahsuboh	research	41.995	-91.6695	Quiscalus quiscula	Common Grackle	9602	Animalia	Chordata	Aves	Passeriformes	Icteridae	Quiscalus	Quiscalus quiscula
294	15T 610160.76mE 4650070.02mN	15T	610161	4.65007e+06	82732627	2021-06-12	2021-06-12 19:32:59 UTC	dannyhughes	research	41.9949	-91.67	Quiscalus quiscula	Common Grackle	9602	Animalia	Chordata	Aves	Passeriformes	Icteridae	Quiscalus	Quiscalus quiscula
314	15T 610093.42mE 4650068.09mN	15T	610093	4.65007e+06	82761547	2021-06-12	2021-06-12 20:16:17 UTC	dannyhughes	research	41.9949	-91.6708	Quiscalus quiscula	Common Grackle	9602	Animalia	Chordata	Aves	Passeriformes	Icteridae	Quiscalus	Quiscalus quiscula
368	15T 610445.09mE 4649925.46mN	15T	610445	4.64993e+06	84632632	2021-06-26	2021-06-26 21:03:23 UTC	dannyhughes	research	41.9936	-91.6666	Quiscalus quiscula	Common Grackle	9602	Animalia	Chordata	Aves	Passeriformes	Icteridae	Quiscalus	Quiscalus quiscula
6	15T 610564.70mE 4649672.84mN	15T	610565	4.64967e+06	73794049	2021-04-05	2021-04-05 22:29:00 UTC	dannyhughes	research	41.9913	-91.6652	Agelaius phoeniceus	Red-winged Blackbird	9744	Animalia	Chordata	Aves	Passeriformes	Icteridae	Agelaius	Agelaius phoeniceus
14	15T 609777.03mE 4650138.79mN	15T	609777	4.65014e+06	74945566	2021-04-23	2021-04-23 12:09:22 UTC	peytynshevchuk	research	41.9956	-91.6746	Agelaius phoeniceus	Red-winged Blackbird	9744	Animalia	Chordata	Aves	Passeriformes	Icteridae	Agelaius	Agelaius phoeniceus
30	15T 610573.81mE 4649711.94mN	15T	610574	4.64971e+06	75051441	2021-04-24	2021-04-24 11:13:23 UTC	kalina_sq	research	41.9917	-91.665	Agelaius phoeniceus	Red-winged Blackbird	9744	Animalia	Chordata	Aves	Passeriformes	Icteridae	Agelaius	Agelaius phoeniceus
34	15T 609780.24mE 4650131.91mN	15T	609780	4.65013e+06	75051706	2021-04-24	2021-04-24 06:20:24 UTC	natalie_prow	research	41.9956	-91.6745	Agelaius phoeniceus	Red-winged Blackbird	9744	Animalia	Chordata	Aves	Passeriformes	Icteridae	Agelaius	Agelaius phoeniceus
35	15T 609775.45mE 4650126.17mN	15T	609775	4.65013e+06	75051737	2021-04-24	2021-04-24 11:20:24 UTC	mackenzie_jones1	research	41.9955	-91.6746	Agelaius phoeniceus	Red-winged Blackbird	9744	Animalia	Chordata	Aves	Passeriformes	Icteridae	Agelaius	Agelaius phoeniceus
36	15T 610490.62mE 4649523.70mN	15T	610491	4.64952e+06	75051761	2021-04-24	2021-04-24 16:19:11 UTC	cjmaldonado	research	41.99	-91.6661	Agelaius phoeniceus	Red-winged Blackbird	9744	Animalia	Chordata	Aves	Passeriformes	Icteridae	Agelaius	Agelaius phoeniceus
37	15T 609771.26mE 4650112.64mN	15T	609771	4.65011e+06	75051781	2021-04-24	2021-04-24 11:20:45 UTC	natalie_prow	research	41.9954	-91.6747	Agelaius phoeniceus	Red-winged Blackbird	9744	Animalia	Chordata	Aves	Passeriformes	Icteridae	Agelaius	Agelaius phoeniceus
44	15T 610515.47mE 4649600.59mN	15T	610515	4.6496e+06	75053175	2021-04-24	2021-04-24 11:24:52 UTC	kalina_sq	research	41.9907	-91.6658	Agelaius phoeniceus	Red-winged Blackbird	9744	Animalia	Chordata	Aves	Passeriformes	Icteridae	Agelaius	Agelaius phoeniceus
50	15T 610460.22mE 4649453.81mN	15T	610460	4.64945e+06	75053769	2021-04-24	2021-04-24 11:33:39 UTC	janielle_cobler	research	41.9894	-91.6665	Agelaius phoeniceus	Red-winged Blackbird	9744	Animalia	Chordata	Aves	Passeriformes	Icteridae	Agelaius	Agelaius phoeniceus
51	15T 610497.69mE 4649557.91mN	15T	610498	4.64956e+06	75053865	2021-04-24	2021-04-24 11:35:26 UTC	heerickson	research	41.9903	-91.666	Agelaius phoeniceus	Red-winged Blackbird	9744	Animalia	Chordata	Aves	Passeriformes	Icteridae	Agelaius	Agelaius phoeniceus
68	15T 610564.52mE 4649692.87mN	15T	610565	4.64969e+06	75057237	2021-04-24	2021-04-24 11:58:35 UTC	ljmosinski	research	41.9915	-91.6652	Agelaius phoeniceus	Red-winged Blackbird	9744	Animalia	Chordata	Aves	Passeriformes	Icteridae	Agelaius	Agelaius phoeniceus
74	15T 609778.64mE 4650073.82mN	15T	609779	4.65007e+06	75059161	2021-04-24	2021-04-24 12:12:09 UTC	heerickson	research	41.995	-91.6746	Agelaius phoeniceus	Red-winged Blackbird	9744	Animalia	Chordata	Aves	Passeriformes	Icteridae	Agelaius	Agelaius phoeniceus
97	15T 610204.98mE 4650074.07mN	15T	610205	4.65007e+06	75062665	2021-04-24	2021-04-24 12:37:34 UTC	blyons20	research	41.995	-91.6694	Agelaius phoeniceus	Red-winged Blackbird	9744	Animalia	Chordata	Aves	Passeriformes	Icteridae	Agelaius	Agelaius phoeniceus
99	15T 610204.76mE 4650076.76mN	15T	610205	4.65008e+06	75062731	2021-04-24	2021-04-24 12:38:02 UTC	ckeller2020	research	41.995	-91.6694	Agelaius phoeniceus	Red-winged Blackbird	9744	Animalia	Chordata	Aves	Passeriformes	Icteridae	Agelaius	Agelaius phoeniceus
100	15T 610286.99mE 4649551.81mN	15T	610287	4.64955e+06	75062845	2021-04-24	2021-04-24 12:13:21 UTC	ashna_k	research	41.9903	-91.6685	Agelaius phoeniceus	Red-winged Blackbird	9744	Animalia	Chordata	Aves	Passeriformes	Icteridae	Agelaius	Agelaius phoeniceus
102	15T 610286.99mE 4649551.81mN	15T	610287	4.64955e+06	75063050	2021-04-24	2021-04-24 07:33:43 UTC	ashna_k	research	41.9903	-91.6685	Agelaius phoeniceus	Red-winged Blackbird	9744	Animalia	Chordata	Aves	Passeriformes	Icteridae	Agelaius	Agelaius phoeniceus
108	15T 610275.15mE 4650053.69mN	15T	610275	4.65005e+06	75065094	2021-04-24	2021-04-24 17:21:00 UTC	samigobeli	research	41.9948	-91.6686	Agelaius phoeniceus	Red-winged Blackbird	9744	Animalia	Chordata	Aves	Passeriformes	Icteridae	Agelaius	Agelaius phoeniceus
126	15T 610476.30mE 4649512.37mN	15T	610476	4.64951e+06	75083940	2021-04-24	2021-04-24 17:51:16 UTC	glueken	research	41.9899	-91.6663	Agelaius phoeniceus	Red-winged Blackbird	9744	Animalia	Chordata	Aves	Passeriformes	Icteridae	Agelaius	Agelaius phoeniceus
139	15T 610286.99mE 4649551.81mN	15T	610287	4.64955e+06	75089857	2021-04-24	2021-04-24 12:44:57 UTC	ashna_k	research	41.9903	-91.6685	Agelaius phoeniceus	Red-winged Blackbird	9744	Animalia	Chordata	Aves	Passeriformes	Icteridae	Agelaius	Agelaius phoeniceus
143	15T 610286.99mE 4649551.81mN	15T	610287	4.64955e+06	75090832	2021-04-24	2021-04-24 11:42:29 UTC	ashna_k	research	41.9903	-91.6685	Agelaius phoeniceus	Red-winged Blackbird	9744	Animalia	Chordata	Aves	Passeriformes	Icteridae	Agelaius	Agelaius phoeniceus
145	15T 610286.99mE 4649551.81mN	15T	610287	4.64955e+06	75090962	2021-04-24	2021-04-24 12:33:43 UTC	ashna_k	research	41.9903	-91.6685	Agelaius phoeniceus	Red-winged Blackbird	9744	Animalia	Chordata	Aves	Passeriformes	Icteridae	Agelaius	Agelaius phoeniceus
150	15T 610286.99mE 4649551.81mN	15T	610287	4.64955e+06	75091459	2021-04-24	2021-04-24 12:02:29 UTC	ashna_k	research	41.9903	-91.6685	Agelaius phoeniceus	Red-winged Blackbird	9744	Animalia	Chordata	Aves	Passeriformes	Icteridae	Agelaius	Agelaius phoeniceus
164	15T 609870.41mE 4650071.21mN	15T	609870	4.65007e+06	75131818	2021-04-24	2021-04-24 17:00:05 UTC	shuggins21	research	41.995	-91.6735	Agelaius phoeniceus	Red-winged Blackbird	9744	Animalia	Chordata	Aves	Passeriformes	Icteridae	Agelaius	Agelaius phoeniceus
167	15T 610593.76mE 4649737.41mN	15T	610594	4.64974e+06	75480814	2021-04-24	2021-04-24 17:32:33 UTC	dannyhughes	research	41.9919	-91.6648	Agelaius phoeniceus	Red-winged Blackbird	9744	Animalia	Chordata	Aves	Passeriformes	Icteridae	Agelaius	Agelaius phoeniceus
168	15T 610570.87mE 4649760.66mN	15T	610571	4.64976e+06	75481302	2021-04-24	2021-04-24 16:56:27 UTC	dannyhughes	research	41.9921	-91.6651	Agelaius phoeniceus	Red-winged Blackbird	9744	Animalia	Chordata	Aves	Passeriformes	Icteridae	Agelaius	Agelaius phoeniceus
237	15T 610363.95mE 4649379.91mN	15T	610364	4.64938e+06	80806133	2021-05-29	2021-05-29 22:02:34 UTC	dannyhughes	research	41.9887	-91.6676	Agelaius phoeniceus	Red-winged Blackbird	9744	Animalia	Chordata	Aves	Passeriformes	Icteridae	Agelaius	Agelaius phoeniceus
247	15T 610354.60mE 4649381.83mN	15T	610355	4.64938e+06	80817107	2021-05-29	2021-05-29 16:57:35 UTC	lyssieahern	research	41.9887	-91.6677	Agelaius phoeniceus	Red-winged Blackbird	9744	Animalia	Chordata	Aves	Passeriformes	Icteridae	Agelaius	Agelaius phoeniceus
265	15T 610463.85mE 4649469.05mN	15T	610464	4.64947e+06	81772310	2021-06-05	2021-06-05 14:13:07 UTC	lyssieahern	research	41.9895	-91.6664	Agelaius phoeniceus	Red-winged Blackbird	9744	Animalia	Chordata	Aves	Passeriformes	Icteridae	Agelaius	Agelaius phoeniceus
266	15T 610489.32mE 4649536.26mN	15T	610489	4.64954e+06	81772361	2021-06-05	2021-06-05 14:14:23 UTC	lyssieahern	research	41.9901	-91.6661	Agelaius phoeniceus	Red-winged Blackbird	9744	Animalia	Chordata	Aves	Passeriformes	Icteridae	Agelaius	Agelaius phoeniceus
268	15T 610559.03mE 4649688.02mN	15T	610559	4.64969e+06	81978719	2021-06-06	2021-06-06 12:39:48 UTC	farahsuboh	research	41.9914	-91.6652	Agelaius phoeniceus	Red-winged Blackbird	9744	Animalia	Chordata	Aves	Passeriformes	Icteridae	Agelaius	Agelaius phoeniceus
279	15T 610333.65mE 4650027.13mN	15T	610334	4.65003e+06	82725727	2021-06-12	2021-06-12 14:07:07 UTC	lyssieahern	research	41.9945	-91.6679	Agelaius phoeniceus	Red-winged Blackbird	9744	Animalia	Chordata	Aves	Passeriformes	Icteridae	Agelaius	Agelaius phoeniceus
313	15T 610539.54mE 4649627.28mN	15T	610540	4.64963e+06	82761494	2021-06-12	2021-06-12 21:02:28 UTC	michael1096	research	41.9909	-91.6655	Agelaius phoeniceus	Red-winged Blackbird	9744	Animalia	Chordata	Aves	Passeriformes	Icteridae	Agelaius	Agelaius phoeniceus
350	15T 610363.16mE 4649387.02mN	15T	610363	4.64939e+06	84630214	2021-06-26	2021-06-26 22:05:16 UTC	dannyhughes	research	41.9888	-91.6676	Agelaius phoeniceus	Red-winged Blackbird	9744	Animalia	Chordata	Aves	Passeriformes	Icteridae	Agelaius	Agelaius phoeniceus
360	15T 610526.62mE 4649606.07mN	15T	610527	4.64961e+06	84630977	2021-06-26	2021-06-26 17:22:11 UTC	lyssieahern	research	41.9907	-91.6656	Agelaius phoeniceus	Red-winged Blackbird	9744	Animalia	Chordata	Aves	Passeriformes	Icteridae	Agelaius	Agelaius phoeniceus
367	15T 610211.48mE 4650067.14mN	15T	610211	4.65007e+06	84632488	2021-06-26	2021-06-26 21:13:02 UTC	dannyhughes	research	41.9949	-91.6693	Agelaius phoeniceus	Red-winged Blackbird	9744	Animalia	Chordata	Aves	Passeriformes	Icteridae	Agelaius	Agelaius phoeniceus
379	15T 610588.95mE 4649733.23mN	15T	610589	4.64973e+06	84633640	2021-06-26	2021-06-26 19:36:22 UTC	dannyhughes	research	41.9918	-91.6649	Agelaius phoeniceus	Red-winged Blackbird	9744	Animalia	Chordata	Aves	Passeriformes	Icteridae	Agelaius	Agelaius phoeniceus
454	15T 610348.96mE 4650010.40mN	15T	610349	4.65001e+06	86510406	2021-07-10	2021-07-10 21:34:05 UTC	jaclynadams	research	41.9944	-91.6677	Agelaius phoeniceus	Red-winged Blackbird	9744	Animalia	Chordata	Aves	Passeriformes	Icteridae	Agelaius	Agelaius phoeniceus
469	15T 610462.36mE 4649476.43mN	15T	610462	4.64948e+06	86515871	2021-07-10	2021-07-10 16:40:19 UTC	lyssieahern	research	41.9896	-91.6664	Agelaius phoeniceus	Red-winged Blackbird	9744	Animalia	Chordata	Aves	Passeriformes	Icteridae	Agelaius	Agelaius phoeniceus
473	15T 610286.99mE 4649551.81mN	15T	610287	4.64955e+06	87063216	2021-07-10	2021-07-10 14:27:55 UTC	ashna_k	research	41.9903	-91.6685	Agelaius phoeniceus	Red-winged Blackbird	9744	Animalia	Chordata	Aves	Passeriformes	Icteridae	Agelaius	Agelaius phoeniceus
496	15T 610214.54mE 4649505.03mN	15T	610215	4.64951e+06	88490317	2021-07-24	2021-07-24 16:23:42 UTC	laurvelez	research	41.9898	-91.6694	Agelaius phoeniceus	Red-winged Blackbird	9744	Animalia	Chordata	Aves	Passeriformes	Icteridae	Agelaius	Agelaius phoeniceus
206	15T 609940.73mE 4650112.41mN	15T	609941	4.65011e+06	78905917	2021-05-15	2021-05-15 11:43:00 UTC	robbie16	research	41.9954	-91.6726	Piranga olivacea	Scarlet Tanager	9921	Animalia	Chordata	Aves	Passeriformes	Cardinalidae	Piranga	Piranga olivacea
204	15T 609904.68mE 4650144.78mN	15T	609905	4.65014e+06	78905915	2021-05-15	2021-05-15 11:33:00 UTC	robbie16	research	41.9956	-91.673	Setophaga ruticilla	American Redstart	10247	Animalia	Chordata	Aves	Passeriformes	Parulidae	Setophaga	Setophaga ruticilla
301	15T 609842.38mE 4650122.75mN	15T	609842	4.65012e+06	82759026	2021-06-12	2021-06-12 21:36:45 UTC	jaclynadams	research	41.9955	-91.6738	Setophaga ruticilla	American Redstart	10247	Animalia	Chordata	Aves	Passeriformes	Parulidae	Setophaga	Setophaga ruticilla
364	15T 609960.91mE 4650159.42mN	15T	609961	4.65016e+06	84631666	2021-06-26	2021-06-26 21:28:24 UTC	dannyhughes	research	41.9958	-91.6724	Setophaga ruticilla	American Redstart	10247	Animalia	Chordata	Aves	Passeriformes	Parulidae	Setophaga	Setophaga ruticilla
203	15T 610369.45mE 4649926.70mN	15T	610369	4.64993e+06	78905908	2021-05-15	2021-05-15 12:33:00 UTC	robbie16	research	41.9936	-91.6675	Progne subis	Purple Martin	11867	Animalia	Chordata	Aves	Passeriformes	Hirundinidae	Progne	Progne subis
85	15T 609933.32mE 4649711.86mN	15T	609933	4.64971e+06	75061878	2021-04-24	2021-04-24 12:28:36 UTC	kalina_sq	research	41.9917	-91.6728	Hirundo rustica	Barn Swallow	11901	Animalia	Chordata	Aves	Passeriformes	Hirundinidae	Hirundo	Hirundo rustica
640	15T 610388.57mE 4650023.50mN	15T	610389	4.65002e+06	94531634	2021-09-11	2021-09-11 18:36:06 UTC	dannyhughes	research	41.9945	-91.6672	Hirundo rustica	Barn Swallow	11901	Animalia	Chordata	Aves	Passeriformes	Hirundinidae	Hirundo	Hirundo rustica
93	15T 609915.74mE 4650059.12mN	15T	609916	4.65006e+06	75062355	2021-04-24	2021-04-24 12:33:38 UTC	henry_hoyhtya	research	41.9949	-91.6729	Tachycineta bicolor	Tree Swallow	11935	Animalia	Chordata	Aves	Passeriformes	Hirundinidae	Tachycineta	Tachycineta bicolor
159	15T 609932.38mE 4649713.39mN	15T	609932	4.64971e+06	75110425	2021-04-24	2021-04-24 12:33:15 UTC	kalina_sq	research	41.9918	-91.6728	Tachycineta bicolor	Tree Swallow	11935	Animalia	Chordata	Aves	Passeriformes	Hirundinidae	Tachycineta	Tachycineta bicolor
346	15T 610394.90mE 4649975.15mN	15T	610395	4.64998e+06	84629085	2021-06-26	2021-06-26 22:46:06 UTC	dannyhughes	research	41.9941	-91.6671	Tachycineta bicolor	Tree Swallow	11935	Animalia	Chordata	Aves	Passeriformes	Hirundinidae	Tachycineta	Tachycineta bicolor
369	15T 610535.76mE 4649816.55mN	15T	610536	4.64982e+06	84632715	2021-06-26	2021-06-26 21:01:40 UTC	dannyhughes	research	41.9926	-91.6655	Tachycineta bicolor	Tree Swallow	11935	Animalia	Chordata	Aves	Passeriformes	Hirundinidae	Tachycineta	Tachycineta bicolor
9	15T 610095.21mE 4650088.04mN	15T	610095	4.65009e+06	74943607	2021-04-23	2021-04-23 11:51:23 UTC	peytynshevchuk	research	41.9951	-91.6707	Turdus migratorius	American Robin	12727	Animalia	Chordata	Aves	Passeriformes	Turdidae	Turdus	Turdus migratorius
16	15T 610358.53mE 4649986.79mN	15T	610359	4.64999e+06	75049047	2021-04-24	2021-04-24 15:58:57 UTC	samigobeli	research	41.9942	-91.6676	Turdus migratorius	American Robin	12727	Animalia	Chordata	Aves	Passeriformes	Turdidae	Turdus	Turdus migratorius
18	15T 610107.64mE 4650086.82mN	15T	610108	4.65009e+06	75049662	2021-04-24	2021-04-24 11:03:54 UTC	heerickson	research	41.9951	-91.6706	Turdus migratorius	American Robin	12727	Animalia	Chordata	Aves	Passeriformes	Turdidae	Turdus	Turdus migratorius
19	15T 610107.68mE 4650085.44mN	15T	610108	4.65009e+06	75049784	2021-04-24	2021-04-24 11:03:52 UTC	heerickson	research	41.9951	-91.6706	Turdus migratorius	American Robin	12727	Animalia	Chordata	Aves	Passeriformes	Turdidae	Turdus	Turdus migratorius
47	15T 610205.42mE 4649469.59mN	15T	610205	4.64947e+06	75053622	2021-04-24	2021-04-24 11:33:31 UTC	natalie_prow	research	41.9895	-91.6695	Turdus migratorius	American Robin	12727	Animalia	Chordata	Aves	Passeriformes	Turdidae	Turdus	Turdus migratorius
49	15T 610214.89mE 4649477.55mN	15T	610215	4.64948e+06	75053684	2021-04-24	2021-04-24 11:33:53 UTC	mackenzie_jones1	research	41.9896	-91.6694	Turdus migratorius	American Robin	12727	Animalia	Chordata	Aves	Passeriformes	Turdidae	Turdus	Turdus migratorius
56	15T 610414.56mE 4649388.69mN	15T	610415	4.64939e+06	75055071	2021-04-24	2021-04-24 16:34:08 UTC	cjmaldonado	research	41.9888	-91.667	Turdus migratorius	American Robin	12727	Animalia	Chordata	Aves	Passeriformes	Turdidae	Turdus	Turdus migratorius
59	15T 610458.50mE 4649446.07mN	15T	610458	4.64945e+06	75055684	2021-04-24	2021-04-24 11:33:23 UTC	kalina_sq	research	41.9893	-91.6665	Turdus migratorius	American Robin	12727	Animalia	Chordata	Aves	Passeriformes	Turdidae	Turdus	Turdus migratorius
73	15T 610450.46mE 4649445.29mN	15T	610450	4.64945e+06	75058404	2021-04-24	2021-04-24 12:03:48 UTC	ljmosinski	research	41.9893	-91.6666	Turdus migratorius	American Robin	12727	Animalia	Chordata	Aves	Passeriformes	Turdidae	Turdus	Turdus migratorius
94	15T 610148.43mE 4650089.90mN	15T	610148	4.65009e+06	75062479	2021-04-24	2021-04-24 12:35:35 UTC	blyons20	research	41.9951	-91.6701	Turdus migratorius	American Robin	12727	Animalia	Chordata	Aves	Passeriformes	Turdidae	Turdus	Turdus migratorius
106	15T 610019.91mE 4650102.01mN	15T	610020	4.6501e+06	75064247	2021-04-24	2021-04-24 12:47:13 UTC	henry_hoyhtya	research	41.9952	-91.6717	Turdus migratorius	American Robin	12727	Animalia	Chordata	Aves	Passeriformes	Turdidae	Turdus	Turdus migratorius
118	15T 610276.36mE 4650062.14mN	15T	610276	4.65006e+06	75070112	2021-04-24	2021-04-24 08:26:46 UTC	igorito	research	41.9949	-91.6686	Turdus migratorius	American Robin	12727	Animalia	Chordata	Aves	Passeriformes	Turdidae	Turdus	Turdus migratorius
121	15T 610394.98mE 4649989.95mN	15T	610395	4.64999e+06	75074382	2021-04-24	2021-04-24 12:46:12 UTC	meagan_harvey	research	41.9942	-91.6671	Turdus migratorius	American Robin	12727	Animalia	Chordata	Aves	Passeriformes	Turdidae	Turdus	Turdus migratorius
124	15T 610571.24mE 4649738.75mN	15T	610571	4.64974e+06	75079404	2021-04-24	2021-04-24 12:37:36 UTC	laurvelez	research	41.9919	-91.6651	Turdus migratorius	American Robin	12727	Animalia	Chordata	Aves	Passeriformes	Turdidae	Turdus	Turdus migratorius
138	15T 610286.99mE 4649551.81mN	15T	610287	4.64955e+06	75089264	2021-04-24	2021-04-24 11:43:19 UTC	ashna_k	research	41.9903	-91.6685	Turdus migratorius	American Robin	12727	Animalia	Chordata	Aves	Passeriformes	Turdidae	Turdus	Turdus migratorius
142	15T 610286.99mE 4649551.81mN	15T	610287	4.64955e+06	75090389	2021-04-24	2021-04-24 11:41:31 UTC	ashna_k	research	41.9903	-91.6685	Turdus migratorius	American Robin	12727	Animalia	Chordata	Aves	Passeriformes	Turdidae	Turdus	Turdus migratorius
147	15T 610286.99mE 4649551.81mN	15T	610287	4.64955e+06	75091137	2021-04-24	2021-04-24 11:43:29 UTC	ashna_k	research	41.9903	-91.6685	Turdus migratorius	American Robin	12727	Animalia	Chordata	Aves	Passeriformes	Turdidae	Turdus	Turdus migratorius
156	15T 610135.76mE 4650340.01mN	15T	610136	4.65034e+06	75094004	2021-04-24	2021-04-24 12:46:19 UTC	audreyt123	research	41.9974	-91.6702	Turdus migratorius	American Robin	12727	Animalia	Chordata	Aves	Passeriformes	Turdidae	Turdus	Turdus migratorius
178	15T 610286.99mE 4649551.81mN	15T	610287	4.64955e+06	76269889	2021-04-28	2021-04-28 23:51:15 UTC	delaney_throckmorton	research	41.9903	-91.6685	Turdus migratorius	American Robin	12727	Animalia	Chordata	Aves	Passeriformes	Turdidae	Turdus	Turdus migratorius
205	15T 610052.78mE 4650108.83mN	15T	610053	4.65011e+06	78905916	2021-05-15	2021-05-15 11:37:00 UTC	robbie16	research	41.9953	-91.6713	Turdus migratorius	American Robin	12727	Animalia	Chordata	Aves	Passeriformes	Turdidae	Turdus	Turdus migratorius
211	15T 610311.50mE 4649443.92mN	15T	610312	4.64944e+06	78912100	2021-05-15	2021-05-15 16:32:39 UTC	jaclynadams	research	41.9893	-91.6683	Turdus migratorius	American Robin	12727	Animalia	Chordata	Aves	Passeriformes	Turdidae	Turdus	Turdus migratorius
232	15T 610350.17mE 4650006.77mN	15T	610350	4.65001e+06	80771867	2021-05-29	2021-05-29 13:32:39 UTC	laurvelez	research	41.9943	-91.6677	Turdus migratorius	American Robin	12727	Animalia	Chordata	Aves	Passeriformes	Turdidae	Turdus	Turdus migratorius
259	15T 609884.77mE 4650159.90mN	15T	609885	4.65016e+06	81771570	2021-06-05	2021-06-05 13:38:26 UTC	lyssieahern	research	41.9958	-91.6733	Turdus migratorius	American Robin	12727	Animalia	Chordata	Aves	Passeriformes	Turdidae	Turdus	Turdus migratorius
267	15T 610559.23mE 4649790.38mN	15T	610559	4.64979e+06	81772455	2021-06-05	2021-06-05 14:18:53 UTC	lyssieahern	research	41.9924	-91.6652	Turdus migratorius	American Robin	12727	Animalia	Chordata	Aves	Passeriformes	Turdidae	Turdus	Turdus migratorius
280	15T 609954.24mE 4650164.76mN	15T	609954	4.65016e+06	82726696	2021-06-12	2021-06-12 14:04:24 UTC	laurvelez	research	41.9958	-91.6724	Turdus migratorius	American Robin	12727	Animalia	Chordata	Aves	Passeriformes	Turdidae	Turdus	Turdus migratorius
295	15T 610332.57mE 4650034.08mN	15T	610333	4.65003e+06	82732868	2021-06-12	2021-06-12 14:33:56 UTC	lyssieahern	research	41.9946	-91.6679	Turdus migratorius	American Robin	12727	Animalia	Chordata	Aves	Passeriformes	Turdidae	Turdus	Turdus migratorius
311	15T 610318.74mE 4650067.14mN	15T	610319	4.65007e+06	82761081	2021-06-12	2021-06-12 20:19:44 UTC	dannyhughes	research	41.9949	-91.6681	Turdus migratorius	American Robin	12727	Animalia	Chordata	Aves	Passeriformes	Turdidae	Turdus	Turdus migratorius
338	15T 610345.21mE 4650029.53mN	15T	610345	4.65003e+06	84597612	2021-06-26	2021-06-26 14:44:00 UTC	lyssieahern	research	41.9945	-91.6677	Turdus migratorius	American Robin	12727	Animalia	Chordata	Aves	Passeriformes	Turdidae	Turdus	Turdus migratorius
387	15T 610342.60mE 4650062.88mN	15T	610343	4.65006e+06	84634989	2021-06-26	2021-06-26 19:06:41 UTC	dannyhughes	research	41.9949	-91.6678	Turdus migratorius	American Robin	12727	Animalia	Chordata	Aves	Passeriformes	Turdidae	Turdus	Turdus migratorius
428	15T 610372.13mE 4649973.07mN	15T	610372	4.64997e+06	86501521	2021-07-10	2021-07-10 19:44:08 UTC	dannyhughes	research	41.994	-91.6674	Turdus migratorius	American Robin	12727	Animalia	Chordata	Aves	Passeriformes	Turdidae	Turdus	Turdus migratorius
459	15T 610362.81mE 4649990.38mN	15T	610363	4.64999e+06	86515148	2021-07-10	2021-07-10 14:30:17 UTC	lyssieahern	research	41.9942	-91.6675	Turdus migratorius	American Robin	12727	Animalia	Chordata	Aves	Passeriformes	Turdidae	Turdus	Turdus migratorius
492	15T 610357.55mE 4650006.10mN	15T	610358	4.65001e+06	88443891	2021-07-24	2021-07-24 13:03:38 UTC	laurvelez	research	41.9943	-91.6676	Turdus migratorius	American Robin	12727	Animalia	Chordata	Aves	Passeriformes	Turdidae	Turdus	Turdus migratorius
66	15T 610338.33mE 4649403.79mN	15T	610338	4.6494e+06	75057059	2021-04-24	2021-04-24 11:49:42 UTC	kalina_sq	research	41.9889	-91.6679	Passer domesticus	House Sparrow	13858	Animalia	Chordata	Aves	Passeriformes	Passeridae	Passer	Passer domesticus
122	15T 610176.19mE 4650074.65mN	15T	610176	4.65007e+06	75074443	2021-04-24	2021-04-24 12:53:55 UTC	meagan_harvey	research	41.995	-91.6698	Passer domesticus	House Sparrow	13858	Animalia	Chordata	Aves	Passeriformes	Passeridae	Passer	Passer domesticus
160	15T 610177.48mE 4650080.60mN	15T	610177	4.65008e+06	75131699	2021-04-24	2021-04-24 16:02:28 UTC	shuggins21	research	41.995	-91.6698	Passer domesticus	House Sparrow	13858	Animalia	Chordata	Aves	Passeriformes	Passeridae	Passer	Passer domesticus
213	15T 610347.35mE 4649391.09mN	15T	610347	4.64939e+06	78913021	2021-05-15	2021-05-15 16:36:46 UTC	jaclynadams	research	41.9888	-91.6678	Passer domesticus	House Sparrow	13858	Animalia	Chordata	Aves	Passeriformes	Passeridae	Passer	Passer domesticus
216	15T 610368.45mE 4649365.07mN	15T	610368	4.64937e+06	78915376	2021-05-15	2021-05-15 16:35:00 UTC	jaclynadams	research	41.9886	-91.6676	Passer domesticus	House Sparrow	13858	Animalia	Chordata	Aves	Passeriformes	Passeridae	Passer	Passer domesticus
239	15T 610378.41mE 4649367.49mN	15T	610378	4.64937e+06	80806438	2021-05-29	2021-05-29 21:57:31 UTC	dannyhughes	research	41.9886	-91.6675	Passer domesticus	House Sparrow	13858	Animalia	Chordata	Aves	Passeriformes	Passeridae	Passer	Passer domesticus
274	15T 610349.01mE 4650048.09mN	15T	610349	4.65005e+06	82721648	2021-06-12	2021-06-12 13:25:49 UTC	laurvelez	research	41.9947	-91.6677	Passer domesticus	House Sparrow	13858	Animalia	Chordata	Aves	Passeriformes	Passeridae	Passer	Passer domesticus
292	15T 610357.47mE 4650025.02mN	15T	610357	4.65003e+06	82732086	2021-06-12	2021-06-12 19:45:27 UTC	dannyhughes	research	41.9945	-91.6676	Passer domesticus	House Sparrow	13858	Animalia	Chordata	Aves	Passeriformes	Passeridae	Passer	Passer domesticus
388	15T 610333.25mE 4650077.62mN	15T	610333	4.65008e+06	84635037	2021-06-26	2021-06-26 19:03:16 UTC	dannyhughes	research	41.995	-91.6679	Passer domesticus	House Sparrow	13858	Animalia	Chordata	Aves	Passeriformes	Passeridae	Passer	Passer domesticus
487	15T 610345.73mE 4650023.06mN	15T	610346	4.65002e+06	88425920	2021-07-24	2021-07-24 13:28:18 UTC	lyssieahern	research	41.9945	-91.6677	Passer domesticus	House Sparrow	13858	Animalia	Chordata	Aves	Passeriformes	Passeridae	Passer	Passer domesticus
490	15T 610359.46mE 4650019.68mN	15T	610359	4.65002e+06	88443020	2021-07-24	2021-07-24 13:18:54 UTC	laurvelez	research	41.9945	-91.6676	Passer domesticus	House Sparrow	13858	Animalia	Chordata	Aves	Passeriformes	Passeridae	Passer	Passer domesticus
624	15T 610456.90mE 4649451.92mN	15T	610457	4.64945e+06	94529914	2021-09-11	2021-09-11 21:14:59 UTC	dannyhughes	research	41.9893	-91.6665	Passer domesticus	House Sparrow	13858	Animalia	Chordata	Aves	Passeriformes	Passeridae	Passer	Passer domesticus
328	15T 610329.03mE 4650027.55mN	15T	610329	4.65003e+06	82792015	2021-06-12	2021-06-12 16:09:08 UTC	jaclynadams	research	41.9945	-91.6679	Sitta carolinensis	White-breasted Nuthatch	14801	Animalia	Chordata	Aves	Passeriformes	Sittidae	Sitta	Sitta carolinensis
462	15T 610349.14mE 4650007.93mN	15T	610349	4.65001e+06	86515431	2021-07-10	2021-07-10 14:43:40 UTC	lyssieahern	research	41.9944	-91.6677	Sitta carolinensis	White-breasted Nuthatch	14801	Animalia	Chordata	Aves	Passeriformes	Sittidae	Sitta	Sitta carolinensis
214	15T 609941.95mE 4649673.92mN	15T	609942	4.64967e+06	78913558	2021-05-15	2021-05-15 16:33:10 UTC	jaclynadams	research	41.9914	-91.6727	Tyrannus tyrannus	Eastern Kingbird	16782	Animalia	Chordata	Aves	Passeriformes	Tyrannidae	Tyrannus	Tyrannus tyrannus
347	15T 610333.78mE 4650020.21mN	15T	610334	4.65002e+06	84629204	2021-06-26	2021-06-26 22:37:48 UTC	dannyhughes	research	41.9945	-91.6679	Tyrannus tyrannus	Eastern Kingbird	16782	Animalia	Chordata	Aves	Passeriformes	Tyrannidae	Tyrannus	Tyrannus tyrannus
200	15T 609908.37mE 4650131.96mN	15T	609908	4.65013e+06	78905414	2021-05-15	2021-05-15 11:56:00 UTC	robbie16	research	41.9955	-91.673	Vireo gilvus	Warbling Vireo	17394	Animalia	Chordata	Aves	Passeriformes	Vireonidae	Vireo	Vireo gilvus
681	15T 610104.07mE 4650086.49mN	15T	610104	4.65009e+06	96138964	2021-09-25	2021-09-25 14:31:12 UTC	laurvelez	research	41.9951	-91.6706	Sphyrapicus varius	Yellow-bellied Sapsucker	18463	Animalia	Chordata	Aves	Piciformes	Picidae	Sphyrapicus	Sphyrapicus varius
134	15T 610574.94mE 4649688.65mN	15T	610575	4.64969e+06	75085612	2021-04-24	2021-04-24 18:25:20 UTC	dannyhughes	research	41.9914	-91.665	Strix varia	Barred Owl	19893	Animalia	Chordata	Aves	Strigiformes	Strigidae	Strix	Strix varia
354	15T 609775.25mE 4650098.98mN	15T	609775	4.6501e+06	84630580	2021-06-26	2021-06-26 16:37:15 UTC	lyssieahern	research	41.9953	-91.6746	Storeria dekayi	Dekay's Brownsnake	28562	Animalia	Chordata	Reptilia	Squamata	Colubridae	Storeria	Storeria dekayi
463	15T 609988.03mE 4650099.31mN	15T	609988	4.6501e+06	86515609	2021-07-10	2021-07-10 15:36:29 UTC	lyssieahern	research	41.9952	-91.672	Storeria dekayi	Dekay's Brownsnake	28562	Animalia	Chordata	Reptilia	Squamata	Colubridae	Storeria	Storeria dekayi
728	15T 609958.53mE 4650144.86mN	15T	609959	4.65014e+06	98144445	2021-10-12	2021-10-13 01:56:41 UTC	dannyhughes	research	41.9956	-91.6724	Storeria dekayi	Dekay's Brownsnake	28562	Animalia	Chordata	Reptilia	Squamata	Colubridae	Storeria	Storeria dekayi
217	15T 609877.10mE 4650050.88mN	15T	609877	4.65005e+06	80436707	2021-05-26	2021-05-26 17:39:23 UTC	lyssieahern	research	41.9948	-91.6734	Nerodia sipedon	Common Watersnake	29305	Animalia	Chordata	Reptilia	Squamata	Colubridae	Nerodia	Nerodia sipedon
302	15T 610311.94mE 4650030.00mN	15T	610312	4650030	82759156	2021-06-12	2021-06-12 18:26:25 UTC	legendfranks	research	41.9946	-91.6681	Nerodia sipedon	Common Watersnake	29305	Animalia	Chordata	Reptilia	Squamata	Colubridae	Nerodia	Nerodia sipedon
394	15T 610545.65mE 4649633.46mN	15T	610546	4.64963e+06	84899374	2021-06-28	2021-06-28 15:31:53 UTC	laurvelez	research	41.991	-91.6654	Nerodia sipedon sipedon	Northern Watersnake	29306	Animalia	Chordata	Reptilia	Squamata	Colubridae	Nerodia	Nerodia sipedon
395	15T 610491.56mE 4649534.39mN	15T	610492	4.64953e+06	84899520	2021-06-28	2021-06-28 15:23:17 UTC	laurvelez	research	41.9901	-91.6661	Nerodia sipedon sipedon	Northern Watersnake	29306	Animalia	Chordata	Reptilia	Squamata	Colubridae	Nerodia	Nerodia sipedon
179	15T 610304.56mE 4650037.75mN	15T	610305	4.65004e+06	77350723	2021-05-01	2021-05-01 15:25:00 UTC	juliekraft	research	41.9946	-91.6682	Chelydra serpentina	Common Snapping Turtle	39682	Animalia	Chordata	Reptilia	Testudines	Chelydridae	Chelydra	Chelydra serpentina
312	15T 610546.28mE 4649634.50mN	15T	610546	4.64963e+06	82761157	2021-06-12	2021-06-12 15:50:52 UTC	lyssieahern	research	41.991	-91.6654	Chelydra serpentina	Common Snapping Turtle	39682	Animalia	Chordata	Reptilia	Testudines	Chelydridae	Chelydra	Chelydra serpentina
315	15T 610535.96mE 4649626.76mN	15T	610536	4.64963e+06	82761576	2021-06-12	2021-06-12 15:51:20 UTC	lyssieahern	research	41.9909	-91.6655	Chelydra serpentina	Common Snapping Turtle	39682	Animalia	Chordata	Reptilia	Testudines	Chelydridae	Chelydra	Chelydra serpentina
316	15T 610536.52mE 4649626.22mN	15T	610537	4.64963e+06	82761783	2021-06-12	2021-06-12 15:51:35 UTC	lyssieahern	research	41.9909	-91.6655	Chelydra serpentina	Common Snapping Turtle	39682	Animalia	Chordata	Reptilia	Testudines	Chelydridae	Chelydra	Chelydra serpentina
321	15T 610522.20mE 4649614.89mN	15T	610522	4.64961e+06	82762195	2021-06-12	2021-06-12 16:04:19 UTC	lyssieahern	research	41.9908	-91.6657	Chelydra serpentina	Common Snapping Turtle	39682	Animalia	Chordata	Reptilia	Testudines	Chelydridae	Chelydra	Chelydra serpentina
409	15T 610541.58mE 4649642.10mN	15T	610542	4.64964e+06	86469110	2021-07-10	2021-07-10 19:58:41 UTC	art_and_susan_staed	research	41.991	-91.6654	Chelydra serpentina	Common Snapping Turtle	39682	Animalia	Chordata	Reptilia	Testudines	Chelydridae	Chelydra	Chelydra serpentina
484	15T 610549.76mE 4649646.08mN	15T	610550	4.64965e+06	87999522	2021-07-15	2021-07-15 13:35:41 UTC	laurvelez	research	41.9911	-91.6653	Chelydra serpentina	Common Snapping Turtle	39682	Animalia	Chordata	Reptilia	Testudines	Chelydridae	Chelydra	Chelydra serpentina
502	15T 610160.77mE 4649862.71mN	15T	610161	4.64986e+06	88898564	2021-07-24		myranda_hadley	research	41.9931	-91.67	Chelydra serpentina	Common Snapping Turtle	39682	Animalia	Chordata	Reptilia	Testudines	Chelydridae	Chelydra	Chelydra serpentina
503	15T 610160.77mE 4649862.71mN	15T	610161	4.64986e+06	88898914	2021-07-24	2021-07-24 19:37:17 UTC	myranda_hadley	research	41.9931	-91.67	Chelydra serpentina	Common Snapping Turtle	39682	Animalia	Chordata	Reptilia	Testudines	Chelydridae	Chelydra	Chelydra serpentina
514	15T 610566.07mE 4649716.91mN	15T	610566	4.64972e+06	92019100	2021-08-21	2021-08-21 14:49:47 UTC	laurvelez	research	41.9917	-91.6651	Chelydra serpentina	Common Snapping Turtle	39682	Animalia	Chordata	Reptilia	Testudines	Chelydridae	Chelydra	Chelydra serpentina
588	15T 610555.66mE 4649647.15mN	15T	610556	4.64965e+06	92834384	2021-08-28	2021-08-28 19:16:33 UTC	dannyhughes	research	41.9911	-91.6653	Chelydra serpentina	Common Snapping Turtle	39682	Animalia	Chordata	Reptilia	Testudines	Chelydridae	Chelydra	Chelydra serpentina
736	15T 609881.91mE 4649838.20mN	15T	609882	4.64984e+06	98404719	2021-10-16	2021-10-16 13:32:01 UTC	anja280	research	41.9929	-91.6734	Chelydra serpentina	Common Snapping Turtle	39682	Animalia	Chordata	Reptilia	Testudines	Chelydridae	Chelydra	Chelydra serpentina
777	15T 610160.79mE 4649861.19mN	15T	610161	4.64986e+06	98609490	2021-10-16	2021-10-16 21:04:11 UTC	mirowe21	research	41.9931	-91.67	Chelydra serpentina	Common Snapping Turtle	39682	Animalia	Chordata	Reptilia	Testudines	Chelydridae	Chelydra	Chelydra serpentina
309	15T 610538.59mE 4649626.62mN	15T	610539	4.64963e+06	82760454	2021-06-12	2021-06-12 15:50:01 UTC	lyssieahern	research	41.9909	-91.6655	Chrysemys picta	Painted Turtle	39771	Animalia	Chordata	Reptilia	Testudines	Emydidae	Chrysemys	Chrysemys picta
310	15T 610537.88mE 4649627.72mN	15T	610538	4.64963e+06	82760649	2021-06-12	2021-06-12 15:50:18 UTC	lyssieahern	research	41.9909	-91.6655	Chrysemys picta	Painted Turtle	39771	Animalia	Chordata	Reptilia	Testudines	Emydidae	Chrysemys	Chrysemys picta
322	15T 610529.18mE 4649610.37mN	15T	610529	4.64961e+06	82762262	2021-06-12	2021-06-12 16:05:26 UTC	lyssieahern	research	41.9907	-91.6656	Chrysemys picta	Painted Turtle	39771	Animalia	Chordata	Reptilia	Testudines	Emydidae	Chrysemys	Chrysemys picta
323	15T 610530.56mE 4649609.83mN	15T	610531	4.64961e+06	82762401	2021-06-12	2021-06-12 16:05:43 UTC	lyssieahern	research	41.9907	-91.6656	Chrysemys picta	Painted Turtle	39771	Animalia	Chordata	Reptilia	Testudines	Emydidae	Chrysemys	Chrysemys picta
324	15T 610534.43mE 4649611.99mN	15T	610534	4.64961e+06	82762438	2021-06-12	2021-06-12 16:06:04 UTC	lyssieahern	research	41.9908	-91.6655	Chrysemys picta	Painted Turtle	39771	Animalia	Chordata	Reptilia	Testudines	Emydidae	Chrysemys	Chrysemys picta
325	15T 610530.54mE 4649611.31mN	15T	610531	4.64961e+06	82762591	2021-06-12	2021-06-12 16:06:23 UTC	lyssieahern	research	41.9908	-91.6656	Chrysemys picta	Painted Turtle	39771	Animalia	Chordata	Reptilia	Testudines	Emydidae	Chrysemys	Chrysemys picta
392	15T 610542.85mE 4649629.37mN	15T	610543	4.64963e+06	84769566	2021-06-21	2021-06-21 12:16:16 UTC	laurvelez	research	41.9909	-91.6654	Chrysemys picta	Painted Turtle	39771	Animalia	Chordata	Reptilia	Testudines	Emydidae	Chrysemys	Chrysemys picta
393	15T 610543.57mE 4649620.96mN	15T	610544	4.64962e+06	84769689	2021-06-21	2021-06-21 12:21:49 UTC	laurvelez	research	41.9908	-91.6654	Chrysemys picta	Painted Turtle	39771	Animalia	Chordata	Reptilia	Testudines	Emydidae	Chrysemys	Chrysemys picta
435	15T 609999.78mE 4650077.65mN	15T	610000	4.65008e+06	86504526	2021-07-10	2021-07-10 20:35:10 UTC	dannyhughes	research	41.995	-91.6719	Chrysemys picta	Painted Turtle	39771	Animalia	Chordata	Reptilia	Testudines	Emydidae	Chrysemys	Chrysemys picta
483	15T 610557.17mE 4649657.20mN	15T	610557	4.64966e+06	87999297	2021-07-17	2021-07-17 14:30:38 UTC	laurvelez	research	41.9912	-91.6652	Chrysemys picta	Painted Turtle	39771	Animalia	Chordata	Reptilia	Testudines	Emydidae	Chrysemys	Chrysemys picta
482	15T 610558.49mE 4649659.38mN	15T	610558	4.64966e+06	87999206	2021-07-20	2021-07-20 13:16:34 UTC	laurvelez	research	41.9912	-91.6652	Chrysemys picta bellii	Western Painted Turtle	39773	Animalia	Chordata	Reptilia	Testudines	Emydidae	Chrysemys	Chrysemys picta
485	15T 610535.99mE 4649613.78mN	15T	610536	4.64961e+06	88034559	2021-07-21	2021-07-21 17:56:14 UTC	dannyhughes	research	41.9908	-91.6655	Procyon lotor	Common Raccoon	41663	Animalia	Chordata	Mammalia	Carnivora	Procyonidae	Procyon	Procyon lotor
67	15T 609899.72mE 4650099.69mN	15T	609900	4.6501e+06	75057154	2021-04-24	2021-04-24 11:58:28 UTC	heerickson	research	41.9952	-91.6731	Odocoileus virginianus	White-tailed Deer	42223	Animalia	Chordata	Mammalia	Artiodactyla	Cervidae	Odocoileus	Odocoileus virginianus
133	15T 610612.72mE 4649804.18mN	15T	610613	4.6498e+06	75085398	2021-04-24	2021-04-24 17:11:43 UTC	dannyhughes	research	41.9925	-91.6646	Odocoileus virginianus	White-tailed Deer	42223	Animalia	Chordata	Mammalia	Artiodactyla	Cervidae	Odocoileus	Odocoileus virginianus
155	15T 609897.05mE 4650092.60mN	15T	609897	4.65009e+06	75092938	2021-04-24	2021-04-24 13:06:26 UTC	kalina_sq	research	41.9952	-91.6731	Odocoileus virginianus	White-tailed Deer	42223	Animalia	Chordata	Mammalia	Artiodactyla	Cervidae	Odocoileus	Odocoileus virginianus
223	15T 609868.93mE 4650094.97mN	15T	609869	4.65009e+06	80442751	2021-05-26	2021-05-26 22:34:10 UTC	dannyhughes	research	41.9952	-91.6735	Odocoileus virginianus	White-tailed Deer	42223	Animalia	Chordata	Mammalia	Artiodactyla	Cervidae	Odocoileus	Odocoileus virginianus
434	15T 609858.41mE 4649868.40mN	15T	609858	4.64987e+06	86504395	2021-07-10	2021-07-10 21:16:47 UTC	dannyhughes	research	41.9932	-91.6736	Odocoileus virginianus	White-tailed Deer	42223	Animalia	Chordata	Mammalia	Artiodactyla	Cervidae	Odocoileus	Odocoileus virginianus
437	15T 609967.94mE 4650109.72mN	15T	609968	4.65011e+06	86505139	2021-07-10	2021-07-10 22:30:27 UTC	jaclynadams	research	41.9953	-91.6723	Odocoileus virginianus	White-tailed Deer	42223	Animalia	Chordata	Mammalia	Artiodactyla	Cervidae	Odocoileus	Odocoileus virginianus
493	15T 609837.41mE 4650116.21mN	15T	609837	4.65012e+06	88489020	2021-07-24	2021-07-24 16:04:00 UTC	laurvelez	research	41.9954	-91.6739	Odocoileus virginianus	White-tailed Deer	42223	Animalia	Chordata	Mammalia	Artiodactyla	Cervidae	Odocoileus	Odocoileus virginianus
497	15T 609879.83mE 4650149.46mN	15T	609880	4.65015e+06	88500352	2021-07-24	2021-07-24 16:03:13 UTC	lyssieahern	research	41.9957	-91.6733	Odocoileus virginianus	White-tailed Deer	42223	Animalia	Chordata	Mammalia	Artiodactyla	Cervidae	Odocoileus	Odocoileus virginianus
666	15T 609978.54mE 4650115.15mN	15T	609979	4.65012e+06	96133608	2021-09-25	2021-09-25 20:18:20 UTC	lgmontero	research	41.9954	-91.6721	Odocoileus virginianus	White-tailed Deer	42223	Animalia	Chordata	Mammalia	Artiodactyla	Cervidae	Odocoileus	Odocoileus virginianus
222	15T 609925.75mE 4649689.11mN	15T	609926	4.64969e+06	80442610	2021-05-26	2021-05-26 23:11:01 UTC	dannyhughes	research	41.9915	-91.6729	Sylvilagus floridanus	Eastern Cottontail	43111	Animalia	Chordata	Mammalia	Lagomorpha	Leporidae	Sylvilagus	Sylvilagus floridanus
256	15T 610132.13mE 4650091.35mN	15T	610132	4.65009e+06	80981338	2021-05-30	2021-05-31 00:05:17 UTC	dannyhughes	research	41.9951	-91.6703	Sylvilagus floridanus	Eastern Cottontail	43111	Animalia	Chordata	Mammalia	Lagomorpha	Leporidae	Sylvilagus	Sylvilagus floridanus
299	15T 609944.82mE 4650163.91mN	15T	609945	4.65016e+06	82758618	2021-06-12	2021-06-12 22:17:17 UTC	jaclynadams	research	41.9958	-91.6725	Sylvilagus floridanus	Eastern Cottontail	43111	Animalia	Chordata	Mammalia	Lagomorpha	Leporidae	Sylvilagus	Sylvilagus floridanus
357	15T 609970.81mE 4649624.46mN	15T	609971	4.64962e+06	84630739	2021-06-26	2021-06-26 16:57:18 UTC	lyssieahern	research	41.991	-91.6723	Sylvilagus floridanus	Eastern Cottontail	43111	Animalia	Chordata	Mammalia	Lagomorpha	Leporidae	Sylvilagus	Sylvilagus floridanus
103	15T 609883.69mE 4649840.66mN	15T	609884	4.64984e+06	75063560	2021-04-24	2021-04-24 12:43:06 UTC	kalina_sq	research	41.9929	-91.6733	Castor canadensis	American Beaver	43794	Animalia	Chordata	Mammalia	Rodentia	Castoridae	Castor	Castor canadensis
10	15T 610070.64mE 4650084.60mN	15T	610071	4.65008e+06	74943838	2021-04-23	2021-04-23 11:52:20 UTC	peytynshevchuk	research	41.9951	-91.671	Sciurus niger	Fox Squirrel	46020	Animalia	Chordata	Mammalia	Rodentia	Sciuridae	Sciurus	Sciurus niger
489	15T 609949.04mE 4650181.39mN	15T	609949	4.65018e+06	88442673	2021-07-24	2021-07-24 13:24:39 UTC	laurvelez	research	41.996	-91.6725	Sciurus niger	Fox Squirrel	46020	Animalia	Chordata	Mammalia	Rodentia	Sciuridae	Sciurus	Sciurus niger
491	15T 610375.94mE 4650014.41mN	15T	610376	4.65001e+06	88443224	2021-07-24	2021-07-24 13:15:04 UTC	laurvelez	research	41.9944	-91.6674	Sciurus niger	Fox Squirrel	46020	Animalia	Chordata	Mammalia	Rodentia	Sciuridae	Sciurus	Sciurus niger
679	15T 609966.01mE 4650138.95mN	15T	609966	4.65014e+06	96138794	2021-09-25	2021-09-25 14:38:59 UTC	laurvelez	research	41.9956	-91.6723	Sciurus niger	Fox Squirrel	46020	Animalia	Chordata	Mammalia	Rodentia	Sciuridae	Sciurus	Sciurus niger
680	15T 610005.74mE 4650108.37mN	15T	610006	4.65011e+06	96138879	2021-09-25	2021-09-25 14:37:08 UTC	laurvelez	research	41.9953	-91.6718	Sciurus niger	Fox Squirrel	46020	Animalia	Chordata	Mammalia	Rodentia	Sciuridae	Sciurus	Sciurus niger
198	15T 610223.29mE 4649526.75mN	15T	610223	4.64953e+06	78876076	2021-05-15	2021-05-15 13:11:14 UTC	laurvelez	research	41.99	-91.6693	Marmota monax	Groundhog	46095	Animalia	Chordata	Mammalia	Rodentia	Sciuridae	Marmota	Marmota monax
412	15T 610409.31mE 4649912.01mN	15T	610409	4.64991e+06	86482519	2021-07-10	2021-07-10 22:59:14 UTC	dannyhughes	research	41.9935	-91.667	Tamias striatus	Eastern Chipmunk	46217	Animalia	Chordata	Mammalia	Rodentia	Sciuridae	Tamias	Tamias striatus
287	15T 610345.37mE 4650002.31mN	15T	610345	4.65e+06	82730628	2021-06-12	2021-06-12 18:54:42 UTC	dannyhughes	research	41.9943	-91.6677	Apis mellifera	Western Honey Bee	47219	Animalia	Arthropoda	Insecta	Hymenoptera	Apidae	Apis	Apis mellifera
336	15T 610333.68mE 4650025.09mN	15T	610334	4.65003e+06	84597207	2021-06-26	2021-06-26 14:27:00 UTC	lyssieahern	research	41.9945	-91.6679	Apis mellifera	Western Honey Bee	47219	Animalia	Arthropoda	Insecta	Hymenoptera	Apidae	Apis	Apis mellifera
385	15T 610250.08mE 4650065.79mN	15T	610250	4.65007e+06	84634674	2021-06-26	2021-06-26 19:16:50 UTC	dannyhughes	research	41.9949	-91.6689	Apis mellifera	Western Honey Bee	47219	Animalia	Arthropoda	Insecta	Hymenoptera	Apidae	Apis	Apis mellifera
521	15T 610336.93mE 4649927.11mN	15T	610337	4.64993e+06	92041201	2021-08-21	2021-08-21 21:13:51 UTC	samigobeli	research	41.9936	-91.6679	Apis mellifera	Western Honey Bee	47219	Animalia	Arthropoda	Insecta	Hymenoptera	Apidae	Apis	Apis mellifera
574	15T 610291.06mE 4650223.35mN	15T	610291	4.65022e+06	92832150	2021-08-21	2021-08-21 19:45:23 UTC	sangai	research	41.9963	-91.6684	Apis mellifera	Western Honey Bee	47219	Animalia	Arthropoda	Insecta	Hymenoptera	Apidae	Apis	Apis mellifera
586	15T 610489.33mE 4649574.30mN	15T	610489	4.64957e+06	92833938	2021-08-28	2021-08-28 19:21:13 UTC	dannyhughes	research	41.9904	-91.6661	Apis mellifera	Western Honey Bee	47219	Animalia	Arthropoda	Insecta	Hymenoptera	Apidae	Apis	Apis mellifera
654	15T 610339.25mE 4650014.22mN	15T	610339	4.65001e+06	94533048	2021-09-11	2021-09-11 17:56:59 UTC	dannyhughes	research	41.9944	-91.6678	Apis mellifera	Western Honey Bee	47219	Animalia	Arthropoda	Insecta	Hymenoptera	Apidae	Apis	Apis mellifera
662	15T 609991.73mE 4650103.91mN	15T	609992	4.6501e+06	96130680	2021-09-25	2021-09-25 14:56:45 UTC	lexikrestel	research	41.9953	-91.672	Apis mellifera	Western Honey Bee	47219	Animalia	Arthropoda	Insecta	Hymenoptera	Apidae	Apis	Apis mellifera
667	15T 610318.89mE 4650047.92mN	15T	610319	4.65005e+06	96135718	2021-09-25	2021-09-25 15:31:53 UTC	avery131	research	41.9947	-91.6681	Apis mellifera	Western Honey Bee	47219	Animalia	Arthropoda	Insecta	Hymenoptera	Apidae	Apis	Apis mellifera
687	15T 610206.57mE 4650074.57mN	15T	610207	4.65007e+06	96157802	2021-09-25	2021-09-25 15:01:52 UTC	kiilycook	research	41.995	-91.6694	Apis mellifera	Western Honey Bee	47219	Animalia	Arthropoda	Insecta	Hymenoptera	Apidae	Apis	Apis mellifera
704	15T 610318.21mE 4650027.99mN	15T	610318	4.65003e+06	96162116	2021-09-25	2021-09-25 19:18:58 UTC	dannyhughes	research	41.9945	-91.6681	Apis mellifera	Western Honey Bee	47219	Animalia	Arthropoda	Insecta	Hymenoptera	Apidae	Apis	Apis mellifera
707	15T 610333.63mE 4650022.97mN	15T	610334	4.65002e+06	96182131	2021-09-25	2021-09-25 19:18:58 UTC	jaclynadams	research	41.9945	-91.6679	Apis mellifera	Western Honey Bee	47219	Animalia	Arthropoda	Insecta	Hymenoptera	Apidae	Apis	Apis mellifera
233	15T 610059.54mE 4649530.32mN	15T	610060	4.64953e+06	80795197	2021-05-29	2021-05-29 16:45:45 UTC	memohanna	research	41.9901	-91.6713	Lotus corniculatus	bird's-foot trefoil	47435	Plantae	Tracheophyta	Magnoliopsida	Fabales	Fabaceae	Lotus	Lotus corniculatus
275	15T 609849.86mE 4650140.67mN	15T	609850	4.65014e+06	82724697	2021-06-12	2021-06-12 14:04:13 UTC	farahsuboh	research	41.9956	-91.6737	Lotus corniculatus	bird's-foot trefoil	47435	Plantae	Tracheophyta	Magnoliopsida	Fabales	Fabaceae	Lotus	Lotus corniculatus
444	15T 610536.83mE 4649671.19mN	15T	610537	4.64967e+06	86507404	2021-07-10	2021-07-10 21:44:20 UTC	jaclynadams	research	41.9913	-91.6655	Lotus corniculatus	bird's-foot trefoil	47435	Plantae	Tracheophyta	Magnoliopsida	Fabales	Fabaceae	Lotus	Lotus corniculatus
33	15T 609777.71mE 4650138.91mN	15T	609778	4.65014e+06	75051680	2021-04-24	2021-04-24 11:20:02 UTC	natalie_prow	research	41.9956	-91.6746	Taraxacum officinale	common dandelion	47602	Plantae	Tracheophyta	Magnoliopsida	Asterales	Asteraceae	Taraxacum	Taraxacum officinale
86	15T 610036.12mE 4650077.53mN	15T	610036	4.65008e+06	75061909	2021-04-24	2021-04-24 12:31:53 UTC	ckeller2020	research	41.995	-91.6715	Taraxacum officinale	common dandelion	47602	Plantae	Tracheophyta	Magnoliopsida	Asterales	Asteraceae	Taraxacum	Taraxacum officinale
751	15T 610158.31mE 4650088.26mN	15T	610158	4.65009e+06	98428148	2021-10-16	2021-10-16 14:24:20 UTC	kiilycook	research	41.9951	-91.67	Taraxacum officinale	common dandelion	47602	Plantae	Tracheophyta	Magnoliopsida	Asterales	Asteraceae	Taraxacum	Taraxacum officinale
193	15T 610477.08mE 4649505.16mN	15T	610477	4.64951e+06	78873991	2021-05-15	2021-05-15 13:20:36 UTC	laurvelez	research	41.9898	-91.6662	Hesperis matronalis	dame's rocket	47697	Plantae	Tracheophyta	Magnoliopsida	Brassicales	Brassicaceae	Hesperis	Hesperis matronalis
195	15T 609778.03mE 4650096.49mN	15T	609778	4.6501e+06	78874605	2021-05-15	2021-05-15 12:57:57 UTC	laurvelez	research	41.9952	-91.6746	Hesperis matronalis	dame's rocket	47697	Plantae	Tracheophyta	Magnoliopsida	Brassicales	Brassicaceae	Hesperis	Hesperis matronalis
1	15T 610243.87mE 4650076.38mN	15T	610244	4.65008e+06	73236654	2021-04-07	2021-04-07 15:45:49 UTC	kalina_sq	research	41.995	-91.669	Acer negundo	boxelder	47726	Plantae	Tracheophyta	Magnoliopsida	Sapindales	Sapindaceae	Acer	Acer negundo
333	15T 610315.85mE 4650034.99mN	15T	610316	4.65003e+06	84596826	2021-06-26	2021-06-26 14:20:25 UTC	lyssieahern	research	41.9946	-91.6681	Asclepias syriaca	common milkweed	47911	Plantae	Tracheophyta	Magnoliopsida	Gentianales	Apocynaceae	Asclepias	Asclepias syriaca
448	15T 610543.15mE 4649693.18mN	15T	610543	4.64969e+06	86508567	2021-07-10	2021-07-10 21:40:28 UTC	jaclynadams	research	41.9915	-91.6654	Asclepias syriaca	common milkweed	47911	Plantae	Tracheophyta	Magnoliopsida	Gentianales	Apocynaceae	Asclepias	Asclepias syriaca
500	15T 610336.35mE 4649676.81mN	15T	610336	4.64968e+06	88593916	2021-07-24	2021-07-24 13:33:54 UTC	grant179	research	41.9914	-91.6679	Asclepias syriaca	common milkweed	47911	Plantae	Tracheophyta	Magnoliopsida	Gentianales	Apocynaceae	Asclepias	Asclepias syriaca
507	15T 610501.95mE 4649557.89mN	15T	610502	4.64956e+06	88900637	2021-07-24	2021-07-24 19:02:03 UTC	myranda_hadley	research	41.9903	-91.6659	Asclepias syriaca	common milkweed	47911	Plantae	Tracheophyta	Magnoliopsida	Gentianales	Apocynaceae	Asclepias	Asclepias syriaca
753	15T 610072.51mE 4650082.67mN	15T	610073	4.65008e+06	98428525	2021-10-16	2021-10-16 14:22:55 UTC	kiilycook	research	41.9951	-91.671	Asclepias syriaca	common milkweed	47911	Plantae	Tracheophyta	Magnoliopsida	Gentianales	Apocynaceae	Asclepias	Asclepias syriaca
780	15T 610075.41mE 4650091.41mN	15T	610075	4.65009e+06	98642382	2021-10-18	2021-10-18 14:00:00 UTC	gkerns02	research	41.9951	-91.671	Asclepias syriaca	common milkweed	47911	Plantae	Tracheophyta	Magnoliopsida	Gentianales	Apocynaceae	Asclepias	Asclepias syriaca
293	15T 610396.89mE 4649927.22mN	15T	610397	4.64993e+06	82732624	2021-06-12	2021-06-12 14:18:53 UTC	lyssieahern	research	41.9936	-91.6671	Argia apicalis	Blue-fronted Dancer	47975	Animalia	Arthropoda	Insecta	Odonata	Coenagrionidae	Argia	Argia apicalis
335	15T 610332.76mE 4650013.60mN	15T	610333	4.65001e+06	84597158	2021-06-26	2021-06-26 14:24:20 UTC	lyssieahern	research	41.9944	-91.6679	Argia apicalis	Blue-fronted Dancer	47975	Animalia	Arthropoda	Insecta	Odonata	Coenagrionidae	Argia	Argia apicalis
344	15T 610376.71mE 4649967.19mN	15T	610377	4.64997e+06	84628444	2021-06-26	2021-06-26 22:50:34 UTC	dannyhughes	research	41.994	-91.6674	Argia apicalis	Blue-fronted Dancer	47975	Animalia	Arthropoda	Insecta	Odonata	Coenagrionidae	Argia	Argia apicalis
356	15T 609865.20mE 4649872.70mN	15T	609865	4.64987e+06	84630669	2021-06-26	2021-06-26 16:48:52 UTC	lyssieahern	research	41.9932	-91.6736	Argia apicalis	Blue-fronted Dancer	47975	Animalia	Arthropoda	Insecta	Odonata	Coenagrionidae	Argia	Argia apicalis
361	15T 609816.43mE 4649990.80mN	15T	609816	4.64999e+06	84631109	2021-06-26	2021-06-26 21:48:34 UTC	dannyhughes	research	41.9943	-91.6741	Argia apicalis	Blue-fronted Dancer	47975	Animalia	Arthropoda	Insecta	Odonata	Coenagrionidae	Argia	Argia apicalis
582	15T 609975.55mE 4649600.57mN	15T	609976	4.6496e+06	92833517	2021-08-28	2021-08-28 19:33:13 UTC	dannyhughes	research	41.9907	-91.6723	Argia apicalis	Blue-fronted Dancer	47975	Animalia	Arthropoda	Insecta	Odonata	Coenagrionidae	Argia	Argia apicalis
288	15T 610315.63mE 4650042.89mN	15T	610316	4.65004e+06	82731329	2021-06-12	2021-06-12 19:04:01 UTC	dannyhughes	research	41.9947	-91.6681	Harmonia axyridis	Asian Lady Beetle	48484	Animalia	Arthropoda	Insecta	Coleoptera	Coccinellidae	Harmonia	Harmonia axyridis
386	15T 610292.60mE 4650045.25mN	15T	610293	4.65005e+06	84634909	2021-06-26	2021-06-26 19:12:50 UTC	dannyhughes	research	41.9947	-91.6684	Harmonia axyridis	Asian Lady Beetle	48484	Animalia	Arthropoda	Insecta	Coleoptera	Coccinellidae	Harmonia	Harmonia axyridis
554	15T 610284.27mE 4650051.17mN	15T	610284	4.65005e+06	92048264	2021-08-21	2021-08-21 19:19:14 UTC	dannyhughes	research	41.9948	-91.6685	Harmonia axyridis	Asian Lady Beetle	48484	Animalia	Arthropoda	Insecta	Coleoptera	Coccinellidae	Harmonia	Harmonia axyridis
494	15T 609823.91mE 4650149.59mN	15T	609824	4.65015e+06	88489871	2021-07-24	2021-07-24 16:05:36 UTC	laurvelez	research	41.9957	-91.674	Phytolacca americana	American pokeweed	48599	Plantae	Tracheophyta	Magnoliopsida	Caryophyllales	Phytolaccaceae	Phytolacca	Phytolacca americana
748	15T 610136.27mE 4650088.07mN	15T	610136	4.65009e+06	98417637	2021-10-16	2021-10-16 14:57:52 UTC	caitlinev	research	41.9951	-91.6702	Nepeta cataria	Catnip	48622	Plantae	Tracheophyta	Magnoliopsida	Lamiales	Lamiaceae	Nepeta	Nepeta cataria
422	15T 609965.54mE 4650125.87mN	15T	609966	4.65013e+06	86487519	2021-07-10	2021-07-10 20:39:33 UTC	dannyhughes	research	41.9955	-91.6723	Echinacea purpurea	purple coneflower	48627	Plantae	Tracheophyta	Magnoliopsida	Asterales	Asteraceae	Echinacea	Echinacea purpurea
389	15T 610286.99mE 4649551.81mN	15T	610287	4.64955e+06	84658836	2021-06-26	2021-06-26 14:36:25 UTC	carrieschum	research	41.9903	-91.6685	Danaus plexippus	Monarch	48662	Animalia	Arthropoda	Insecta	Lepidoptera	Nymphalidae	Danaus	Danaus plexippus
405	15T 610025.31mE 4649584.44mN	15T	610025	4.64958e+06	86236764	2021-07-08	2021-07-08 21:25:32 UTC	nikki116	research	41.9906	-91.6717	Danaus plexippus	Monarch	48662	Animalia	Arthropoda	Insecta	Lepidoptera	Nymphalidae	Danaus	Danaus plexippus
431	15T 610315.74mE 4650025.58mN	15T	610316	4.65003e+06	86502827	2021-07-10	2021-07-10 19:25:11 UTC	dannyhughes	research	41.9945	-91.6681	Danaus plexippus	Monarch	48662	Animalia	Arthropoda	Insecta	Lepidoptera	Nymphalidae	Danaus	Danaus plexippus
450	15T 610585.23mE 4649757.40mN	15T	610585	4.64976e+06	86509628	2021-07-10	2021-07-10 21:39:34 UTC	jaclynadams	research	41.9921	-91.6649	Danaus plexippus	Monarch	48662	Animalia	Arthropoda	Insecta	Lepidoptera	Nymphalidae	Danaus	Danaus plexippus
520	15T 610392.66mE 4649935.22mN	15T	610393	4.64994e+06	92041033	2021-08-21	2021-08-21 21:07:30 UTC	samigobeli	research	41.9937	-91.6672	Danaus plexippus	Monarch	48662	Animalia	Arthropoda	Insecta	Lepidoptera	Nymphalidae	Danaus	Danaus plexippus
551	15T 610356.46mE 4649984.45mN	15T	610356	4.64998e+06	92047883	2021-08-21	2021-08-21 19:25:22 UTC	dannyhughes	research	41.9941	-91.6676	Danaus plexippus	Monarch	48662	Animalia	Arthropoda	Insecta	Lepidoptera	Nymphalidae	Danaus	Danaus plexippus
552	15T 610384.37mE 4649983.52mN	15T	610384	4.64998e+06	92047948	2021-08-21	2021-08-21 20:03:18 UTC	dannyhughes	research	41.9941	-91.6673	Danaus plexippus	Monarch	48662	Animalia	Arthropoda	Insecta	Lepidoptera	Nymphalidae	Danaus	Danaus plexippus
587	15T 610527.27mE 4649593.70mN	15T	610527	4.64959e+06	92834224	2021-08-28	2021-08-28 19:17:52 UTC	dannyhughes	research	41.9906	-91.6656	Danaus plexippus	Monarch	48662	Animalia	Arthropoda	Insecta	Lepidoptera	Nymphalidae	Danaus	Danaus plexippus
594	15T 610362.74mE 4649985.98mN	15T	610363	4.64999e+06	92836356	2021-08-28	2021-08-28 18:06:06 UTC	dannyhughes	research	41.9942	-91.6675	Danaus plexippus	Monarch	48662	Animalia	Arthropoda	Insecta	Lepidoptera	Nymphalidae	Danaus	Danaus plexippus
602	15T 610376.10mE 4649957.78mN	15T	610376	4.64996e+06	92838518	2021-08-28	2021-08-28 17:16:55 UTC	dannyhughes	research	41.9939	-91.6674	Danaus plexippus	Monarch	48662	Animalia	Arthropoda	Insecta	Lepidoptera	Nymphalidae	Danaus	Danaus plexippus
606	15T 610377.97mE 4649970.96mN	15T	610378	4.64997e+06	92840098	2021-08-28	2021-08-28 17:27:22 UTC	dannyhughes	research	41.994	-91.6674	Danaus plexippus	Monarch	48662	Animalia	Arthropoda	Insecta	Lepidoptera	Nymphalidae	Danaus	Danaus plexippus
611	15T 610542.10mE 4649640.84mN	15T	610542	4.64964e+06	94482958	2021-09-11	2021-09-11 15:00:07 UTC	shion2	research	41.991	-91.6654	Danaus plexippus	Monarch	48662	Animalia	Arthropoda	Insecta	Lepidoptera	Nymphalidae	Danaus	Danaus plexippus
619	15T 609945.64mE 4649642.05mN	15T	609946	4.64964e+06	94529269	2021-09-11	2021-09-11 21:47:33 UTC	dannyhughes	research	41.9911	-91.6726	Danaus plexippus	Monarch	48662	Animalia	Arthropoda	Insecta	Lepidoptera	Nymphalidae	Danaus	Danaus plexippus
635	15T 609839.12mE 4649915.45mN	15T	609839	4.64992e+06	94531088	2021-09-11	2021-09-11 21:42:33 UTC	jaclynadams	research	41.9936	-91.6739	Danaus plexippus	Monarch	48662	Animalia	Arthropoda	Insecta	Lepidoptera	Nymphalidae	Danaus	Danaus plexippus
638	15T 610377.56mE 4649955.24mN	15T	610378	4.64996e+06	94531304	2021-09-11	2021-09-11 19:42:00 UTC	dannyhughes	research	41.9939	-91.6674	Danaus plexippus	Monarch	48662	Animalia	Arthropoda	Insecta	Lepidoptera	Nymphalidae	Danaus	Danaus plexippus
641	15T 610501.87mE 4649598.99mN	15T	610502	4.6496e+06	94531793	2021-09-11	2021-09-11 21:27:16 UTC	jaclynadams	research	41.9907	-91.6659	Danaus plexippus	Monarch	48662	Animalia	Arthropoda	Insecta	Lepidoptera	Nymphalidae	Danaus	Danaus plexippus
553	15T 610311.23mE 4650031.55mN	15T	610311	4.65003e+06	92048099	2021-08-21	2021-08-21 19:18:59 UTC	dannyhughes	research	41.9946	-91.6681	Sphex pensylvanicus	Great Black Digger Wasp	48738	Animalia	Arthropoda	Insecta	Hymenoptera	Sphecidae	Sphex	Sphex pensylvanicus
285	15T 610332.43mE 4650034.33mN	15T	610332	4.65003e+06	82729999	2021-06-12	2021-06-12 14:20:12 UTC	lyssieahern	research	41.9946	-91.6679	Vanessa atalanta	Red Admiral	49133	Animalia	Arthropoda	Insecta	Lepidoptera	Nymphalidae	Vanessa	Vanessa atalanta
460	15T 610374.76mE 4649950.02mN	15T	610375	4.64995e+06	86515245	2021-07-10	2021-07-10 14:32:49 UTC	lyssieahern	research	41.9938	-91.6674	Juniperus virginiana	eastern redcedar	49399	Plantae	Tracheophyta	Pinopsida	Pinales	Cupressaceae	Juniperus	Juniperus virginiana
3	15T 610356.95mE 4650018.43mN	15T	610357	4.65002e+06	73794045	2021-04-05	2021-04-05 22:04:00 UTC	dannyhughes	research	41.9944	-91.6676	Scutigera coleoptrata	House Centipede	49552	Animalia	Arthropoda	Chilopoda	Scutigeromorpha	Scutigeridae	Scutigera	Scutigera coleoptrata
362	15T 609775.01mE 4650102.43mN	15T	609775	4.6501e+06	84631187	2021-06-26	2021-06-26 21:36:13 UTC	dannyhughes	research	41.9953	-91.6746	Scutigera coleoptrata	House Centipede	49552	Animalia	Arthropoda	Chilopoda	Scutigeromorpha	Scutigeridae	Scutigera	Scutigera coleoptrata
762	15T 610387.49mE 4650056.90mN	15T	610387	4.65006e+06	98436647	2021-10-16	2021-10-16 19:08:56 UTC	dannyhughes	research	41.9948	-91.6672	Scutigera coleoptrata	House Centipede	49552	Animalia	Arthropoda	Chilopoda	Scutigeromorpha	Scutigeridae	Scutigera	Scutigera coleoptrata
2	15T 610307.55mE 4650033.51mN	15T	610308	4.65003e+06	73794044	2021-04-05	2021-04-05 21:58:00 UTC	dannyhughes	research	41.9946	-91.6682	Micropterus salmoides	Largemouth Bass	49587	Animalia	Chordata	Actinopterygii	Centrarchiformes	Centrarchidae	Micropterus	Micropterus salmoides
228	15T 609868.31mE 4650042.42mN	15T	609868	4.65004e+06	80534750	2021-05-27	2021-05-27 14:18:18 UTC	lyssieahern	research	41.9947	-91.6735	Micropterus salmoides	Largemouth Bass	49587	Animalia	Chordata	Actinopterygii	Centrarchiformes	Centrarchidae	Micropterus	Micropterus salmoides
241	15T 609846.98mE 4650046.74mN	15T	609847	4.65005e+06	80815688	2021-05-29	2021-05-29 21:03:27 UTC	dannyhughes	research	41.9948	-91.6737	Micropterus salmoides	Largemouth Bass	49587	Animalia	Chordata	Actinopterygii	Centrarchiformes	Centrarchidae	Micropterus	Micropterus salmoides
250	15T 609818.77mE 4650068.58mN	15T	609819	4.65007e+06	80980341	2021-05-30	2021-05-30 23:11:56 UTC	dannyhughes	research	41.995	-91.6741	Micropterus salmoides	Largemouth Bass	49587	Animalia	Chordata	Actinopterygii	Centrarchiformes	Centrarchidae	Micropterus	Micropterus salmoides
251	15T 609839.13mE 4650050.90mN	15T	609839	4.65005e+06	80980497	2021-05-30	2021-05-30 23:15:41 UTC	dannyhughes	research	41.9948	-91.6738	Micropterus salmoides	Largemouth Bass	49587	Animalia	Chordata	Actinopterygii	Centrarchiformes	Centrarchidae	Micropterus	Micropterus salmoides
253	15T 609829.07mE 4650067.27mN	15T	609829	4.65007e+06	80980814	2021-05-30	2021-05-30 23:25:49 UTC	dannyhughes	research	41.995	-91.674	Micropterus salmoides	Largemouth Bass	49587	Animalia	Chordata	Actinopterygii	Centrarchiformes	Centrarchidae	Micropterus	Micropterus salmoides
270	15T 609834.13mE 4650084.60mN	15T	609834	4.65008e+06	81978926	2021-05-29	2021-05-29 16:08:08 UTC	farahsuboh	research	41.9951	-91.6739	Micropterus salmoides	Largemouth Bass	49587	Animalia	Chordata	Actinopterygii	Centrarchiformes	Centrarchidae	Micropterus	Micropterus salmoides
371	15T 610513.35mE 4649552.84mN	15T	610513	4.64955e+06	84632867	2021-06-26	2021-06-26 20:03:33 UTC	dannyhughes	research	41.9902	-91.6658	Micropterus salmoides	Largemouth Bass	49587	Animalia	Chordata	Actinopterygii	Centrarchiformes	Centrarchidae	Micropterus	Micropterus salmoides
423	15T 610542.59mE 4649621.11mN	15T	610543	4.64962e+06	86488647	2021-07-10	2021-07-10 20:03:38 UTC	dannyhughes	research	41.9908	-91.6654	Micropterus salmoides	Largemouth Bass	49587	Animalia	Chordata	Actinopterygii	Centrarchiformes	Centrarchidae	Micropterus	Micropterus salmoides
546	15T 610551.30mE 4649694.59mN	15T	610551	4.64969e+06	92046370	2021-08-21	2021-08-21 20:45:14 UTC	dannyhughes	research	41.9915	-91.6653	Micropterus salmoides	Largemouth Bass	49587	Animalia	Chordata	Actinopterygii	Centrarchiformes	Centrarchidae	Micropterus	Micropterus salmoides
570	15T 610539.13mE 4649633.35mN	15T	610539	4.64963e+06	92812068	2021-08-21	2021-08-21 20:16:58 UTC	sangai	research	41.991	-91.6655	Micropterus salmoides	Largemouth Bass	49587	Animalia	Chordata	Actinopterygii	Centrarchiformes	Centrarchidae	Micropterus	Micropterus salmoides
116	15T 610486.02mE 4649596.53mN	15T	610486	4.6496e+06	75068173	2021-04-24	2021-04-24 16:14:38 UTC	samigobeli	research	41.9906	-91.6661	Lepomis macrochirus	Bluegill	49591	Animalia	Chordata	Actinopterygii	Centrarchiformes	Centrarchidae	Lepomis	Lepomis macrochirus
191	15T 609823.77mE 4650082.12mN	15T	609824	4.65008e+06	78872209	2021-05-15	2021-05-15 17:32:49 UTC	dannyhughes	research	41.9951	-91.674	Lepomis macrochirus	Bluegill	49591	Animalia	Chordata	Actinopterygii	Centrarchiformes	Centrarchidae	Lepomis	Lepomis macrochirus
224	15T 609825.07mE 4650101.05mN	15T	609825	4.6501e+06	80534418	2021-05-27	2021-05-27 13:50:58 UTC	lyssieahern	research	41.9953	-91.674	Lepomis macrochirus	Bluegill	49591	Animalia	Chordata	Actinopterygii	Centrarchiformes	Centrarchidae	Lepomis	Lepomis macrochirus
229	15T 609838.14mE 4650066.78mN	15T	609838	4.65007e+06	80559415	2021-05-27	2021-05-27 18:47:14 UTC	dannyhughes	research	41.995	-91.6739	Lepomis macrochirus	Bluegill	49591	Animalia	Chordata	Actinopterygii	Centrarchiformes	Centrarchidae	Lepomis	Lepomis macrochirus
238	15T 610401.61mE 4649350.47mN	15T	610402	4.64935e+06	80806230	2021-05-29	2021-05-29 22:00:07 UTC	dannyhughes	research	41.9884	-91.6672	Lepomis macrochirus	Bluegill	49591	Animalia	Chordata	Actinopterygii	Centrarchiformes	Centrarchidae	Lepomis	Lepomis macrochirus
248	15T 609817.53mE 4650066.09mN	15T	609818	4.65007e+06	80817673	2021-05-29	2021-05-29 21:03:05 UTC	dannyhughes	research	41.995	-91.6741	Lepomis macrochirus	Bluegill	49591	Animalia	Chordata	Actinopterygii	Centrarchiformes	Centrarchidae	Lepomis	Lepomis macrochirus
252	15T 609874.77mE 4650058.49mN	15T	609875	4.65006e+06	80980740	2021-05-30	2021-05-30 23:18:59 UTC	dannyhughes	research	41.9949	-91.6734	Lepomis macrochirus	Bluegill	49591	Animalia	Chordata	Actinopterygii	Centrarchiformes	Centrarchidae	Lepomis	Lepomis macrochirus
254	15T 609828.51mE 4650064.50mN	15T	609829	4.65006e+06	80980898	2021-05-30	2021-05-30 23:26:01 UTC	dannyhughes	research	41.9949	-91.674	Lepomis macrochirus	Bluegill	49591	Animalia	Chordata	Actinopterygii	Centrarchiformes	Centrarchidae	Lepomis	Lepomis macrochirus
374	15T 610539.60mE 4649609.12mN	15T	610540	4.64961e+06	84633161	2021-06-26	2021-06-26 19:41:58 UTC	dannyhughes	research	41.9907	-91.6655	Lepomis macrochirus	Bluegill	49591	Animalia	Chordata	Actinopterygii	Centrarchiformes	Centrarchidae	Lepomis	Lepomis macrochirus
375	15T 610547.41mE 4649622.90mN	15T	610547	4.64962e+06	84633257	2021-06-26	2021-06-26 19:42:20 UTC	dannyhughes	research	41.9909	-91.6654	Lepomis macrochirus	Bluegill	49591	Animalia	Chordata	Actinopterygii	Centrarchiformes	Centrarchidae	Lepomis	Lepomis macrochirus
376	15T 610539.39mE 4649609.62mN	15T	610539	4.64961e+06	84633320	2021-06-26	2021-06-26 19:48:05 UTC	dannyhughes	research	41.9907	-91.6655	Lepomis macrochirus	Bluegill	49591	Animalia	Chordata	Actinopterygii	Centrarchiformes	Centrarchidae	Lepomis	Lepomis macrochirus
377	15T 610548.78mE 4649629.39mN	15T	610549	4.64963e+06	84633377	2021-06-26	2021-06-26 19:40:53 UTC	dannyhughes	research	41.9909	-91.6654	Lepomis macrochirus	Bluegill	49591	Animalia	Chordata	Actinopterygii	Centrarchiformes	Centrarchidae	Lepomis	Lepomis macrochirus
410	15T 610541.66mE 4649642.10mN	15T	610542	4.64964e+06	86469269	2021-07-10	2021-07-10 19:56:50 UTC	art_and_susan_staed	research	41.991	-91.6654	Lepomis macrochirus	Bluegill	49591	Animalia	Chordata	Actinopterygii	Centrarchiformes	Centrarchidae	Lepomis	Lepomis macrochirus
566	15T 610472.70mE 4650026.88mN	15T	610473	4.65003e+06	92810888	2021-08-21	2021-08-21 20:21:09 UTC	sangai	research	41.9945	-91.6662	Lepomis macrochirus	Bluegill	49591	Animalia	Chordata	Actinopterygii	Centrarchiformes	Centrarchidae	Lepomis	Lepomis macrochirus
729	15T 609836.85mE 4650081.20mN	15T	609837	4.65008e+06	98144787	2021-10-12	2021-10-13 01:27:13 UTC	dannyhughes	research	41.9951	-91.6739	Lepomis macrochirus	Bluegill	49591	Animalia	Chordata	Actinopterygii	Centrarchiformes	Centrarchidae	Lepomis	Lepomis macrochirus
373	15T 610547.97mE 4649623.70mN	15T	610548	4.64962e+06	84633090	2021-06-26	2021-06-26 19:41:51 UTC	dannyhughes	research	41.9909	-91.6654	Pomoxis annularis	White Crappie	49593	Animalia	Chordata	Actinopterygii	Centrarchiformes	Centrarchidae	Pomoxis	Pomoxis annularis
117	15T 610506.86mE 4649604.57mN	15T	610507	4.6496e+06	75068277	2021-04-24	2021-04-24 16:14:57 UTC	samigobeli	research	41.9907	-91.6659	Pomoxis nigromaculatus	Black Crappie	49594	Animalia	Chordata	Actinopterygii	Centrarchiformes	Centrarchidae	Pomoxis	Pomoxis nigromaculatus
272	15T 609832.43mE 4650071.54mN	15T	609832	4.65007e+06	81979075	2021-05-29	2021-05-29 16:07:37 UTC	farahsuboh	research	41.995	-91.6739	Pomoxis nigromaculatus	Black Crappie	49594	Animalia	Chordata	Actinopterygii	Centrarchiformes	Centrarchidae	Pomoxis	Pomoxis nigromaculatus
372	15T 610546.95mE 4649617.68mN	15T	610547	4.64962e+06	84632954	2021-06-26	2021-06-26 19:41:44 UTC	dannyhughes	research	41.9908	-91.6654	Pomoxis nigromaculatus	Black Crappie	49594	Animalia	Chordata	Actinopterygii	Centrarchiformes	Centrarchidae	Pomoxis	Pomoxis nigromaculatus
476	15T 610548.33mE 4649622.39mN	15T	610548	4.64962e+06	87461100	2021-07-15	2021-07-15 18:10:20 UTC	dannyhughes	research	41.9909	-91.6654	Pomoxis nigromaculatus	Black Crappie	49594	Animalia	Chordata	Actinopterygii	Centrarchiformes	Centrarchidae	Pomoxis	Pomoxis nigromaculatus
567	15T 610472.70mE 4650026.88mN	15T	610473	4.65003e+06	92811463	2021-08-21	2021-08-21 20:21:09 UTC	sangai	research	41.9945	-91.6662	Pomoxis nigromaculatus	Black Crappie	49594	Animalia	Chordata	Actinopterygii	Centrarchiformes	Centrarchidae	Pomoxis	Pomoxis nigromaculatus
569	15T 610539.13mE 4649633.35mN	15T	610539	4.64963e+06	92811970	2021-08-21	2021-08-21 20:16:58 UTC	sangai	research	41.991	-91.6655	Pomoxis nigromaculatus	Black Crappie	49594	Animalia	Chordata	Actinopterygii	Centrarchiformes	Centrarchidae	Pomoxis	Pomoxis nigromaculatus
326	15T 609810.66mE 4650095.27mN	15T	609811	4.6501e+06	82762620	2021-06-12	2021-06-12 16:52:56 UTC	lyssieahern	research	41.9952	-91.6742	Aplodinotus grunniens	Freshwater Drum	49749	Animalia	Chordata	Actinopterygii	Perciformes	Sciaenidae	Aplodinotus	Aplodinotus grunniens
396	15T 610548.86mE 4649641.22mN	15T	610549	4.64964e+06	84900177	2021-06-26	2021-06-26 15:38:53 UTC	laurvelez	research	41.991	-91.6654	Notemigonus crysoleucas	Golden Shiner	51351	Animalia	Chordata	Actinopterygii	Cypriniformes	Leuciscidae	Notemigonus	Notemigonus crysoleucas
643	15T 610481.72mE 4649501.29mN	15T	610482	4.6495e+06	94531973	2021-09-11	2021-09-11 18:29:59 UTC	dannyhughes	research	41.9898	-91.6662	Polistes fuscatus	Dark Paper Wasp	52757	Animalia	Arthropoda	Insecta	Hymenoptera	Vespidae	Polistes	Polistes fuscatus
407	15T 610012.09mE 4649609.14mN	15T	610012	4.64961e+06	86265847	2021-07-08	2021-07-08 21:23:38 UTC	nikki116	research	41.9908	-91.6718	Cephalanthus occidentalis	buttonbush	52763	Plantae	Tracheophyta	Magnoliopsida	Gentianales	Rubiaceae	Cephalanthus	Cephalanthus occidentalis
451	15T 610483.65mE 4649548.61mN	15T	610484	4.64955e+06	86509719	2021-07-10	2021-07-10 21:41:46 UTC	jaclynadams	research	41.9902	-91.6662	Cephalanthus occidentalis	buttonbush	52763	Plantae	Tracheophyta	Magnoliopsida	Gentianales	Rubiaceae	Cephalanthus	Cephalanthus occidentalis
456	15T 610340.52mE 4650002.99mN	15T	610341	4.65e+06	86514961	2021-07-10	2021-07-10 14:21:49 UTC	lyssieahern	research	41.9943	-91.6678	Cephalanthus occidentalis	buttonbush	52763	Plantae	Tracheophyta	Magnoliopsida	Gentianales	Rubiaceae	Cephalanthus	Cephalanthus occidentalis
509	15T 610501.95mE 4649557.89mN	15T	610502	4.64956e+06	88901111	2021-07-24	2021-07-24 19:06:51 UTC	myranda_hadley	research	41.9903	-91.6659	Cephalanthus occidentalis	buttonbush	52763	Plantae	Tracheophyta	Magnoliopsida	Gentianales	Rubiaceae	Cephalanthus	Cephalanthus occidentalis
771	15T 610250.25mE 4650067.97mN	15T	610250	4.65007e+06	98515982	2021-10-17	2021-10-17 13:04:44 UTC	briannastarry	research	41.9949	-91.6689	Cephalanthus occidentalis	buttonbush	52763	Plantae	Tracheophyta	Magnoliopsida	Gentianales	Rubiaceae	Cephalanthus	Cephalanthus occidentalis
585	15T 610432.21mE 4649425.58mN	15T	610432	4.64943e+06	92833849	2021-08-28	2021-08-28 19:23:37 UTC	dannyhughes	research	41.9891	-91.6668	Phyciodes tharos	Pearl Crescent	52925	Animalia	Arthropoda	Insecta	Lepidoptera	Nymphalidae	Phyciodes	Phyciodes tharos
685	15T 610123.61mE 4650081.98mN	15T	610124	4.65008e+06	96142244	2021-09-25	2021-09-25 15:50:30 UTC	joely98	research	41.9951	-91.6704	Phyciodes tharos	Pearl Crescent	52925	Animalia	Arthropoda	Insecta	Lepidoptera	Nymphalidae	Phyciodes	Phyciodes tharos
234	15T 610470.52mE 4650164.37mN	15T	610471	4.65016e+06	80802784	2021-05-29	2021-05-29 21:10:40 UTC	robbie16	research	41.9957	-91.6662	Eupatorium serotinum	late boneset	52934	Plantae	Tracheophyta	Magnoliopsida	Asterales	Asteraceae	Eupatorium	Eupatorium serotinum
741	15T 610255.80mE 4649463.76mN	15T	610256	4.64946e+06	98406982	2021-10-16	2021-10-16 18:53:12 UTC	claire_preheim	research	41.9895	-91.6689	Cirsium vulgare	Bull Thistle	52989	Plantae	Tracheophyta	Magnoliopsida	Asterales	Asteraceae	Cirsium	Cirsium vulgare
263	15T 609878.16mE 4649811.26mN	15T	609878	4.64981e+06	81772137	2021-06-05	2021-06-05 13:49:53 UTC	lyssieahern	research	41.9926	-91.6734	Convolvulus arvensis	field bindweed	53021	Plantae	Tracheophyta	Magnoliopsida	Solanales	Convolvulaceae	Convolvulus	Convolvulus arvensis
129	15T 610515.66mE 4649795.56mN	15T	610516	4.6498e+06	75084349	2021-04-24	2021-04-24 13:40:49 UTC	kalina_sq	research	41.9924	-91.6657	Plantago lanceolata	ribwort plantain	53178	Plantae	Tracheophyta	Magnoliopsida	Lamiales	Plantaginaceae	Plantago	Plantago lanceolata
461	15T 610318.28mE 4650038.73mN	15T	610318	4.65004e+06	86515401	2021-07-10	2021-07-10 14:40:23 UTC	lyssieahern	research	41.9946	-91.6681	Rumex crispus	curly dock	53197	Plantae	Tracheophyta	Magnoliopsida	Caryophyllales	Polygonaceae	Rumex	Rumex crispus
541	15T 609951.61mE 4650155.23mN	15T	609952	4.65016e+06	92044461	2021-08-21	2021-08-21 21:44:00 UTC	dannyhughes	research	41.9957	-91.6725	Boisea trivittata	Eastern Boxelder Bug	53227	Animalia	Arthropoda	Insecta	Hemiptera	Rhopalidae	Boisea	Boisea trivittata
543	15T 610187.30mE 4650071.51mN	15T	610187	4.65007e+06	92044870	2021-08-21	2021-08-21 21:32:42 UTC	dannyhughes	research	41.995	-91.6696	Boisea trivittata	Eastern Boxelder Bug	53227	Animalia	Arthropoda	Insecta	Hemiptera	Rhopalidae	Boisea	Boisea trivittata
572	15T 609981.31mE 4650109.57mN	15T	609981	4.65011e+06	92831952	2021-08-28	2021-08-28 19:53:49 UTC	dannyhughes	research	41.9953	-91.6721	Boisea trivittata	Eastern Boxelder Bug	53227	Animalia	Arthropoda	Insecta	Hemiptera	Rhopalidae	Boisea	Boisea trivittata
720	15T 609762.16mE 4650137.06mN	15T	609762	4.65014e+06	97482154	2021-08-21	2021-08-21 22:00:00 UTC	emilylarosa	research	41.9956	-91.6748	Boisea trivittata	Eastern Boxelder Bug	53227	Animalia	Arthropoda	Insecta	Hemiptera	Rhopalidae	Boisea	Boisea trivittata
755	15T 610345.46mE 4650000.98mN	15T	610345	4.65e+06	98432779	2021-10-16	2021-10-16 21:55:53 UTC	dannyhughes	research	41.9943	-91.6677	Boisea trivittata	Eastern Boxelder Bug	53227	Animalia	Arthropoda	Insecta	Hemiptera	Rhopalidae	Boisea	Boisea trivittata
764	15T 610307.27mE 4650062.46mN	15T	610307	4.65006e+06	98437147	2021-10-16	2021-10-16 18:49:59 UTC	dannyhughes	research	41.9949	-91.6682	Boisea trivittata	Eastern Boxelder Bug	53227	Animalia	Arthropoda	Insecta	Hemiptera	Rhopalidae	Boisea	Boisea trivittata
773	15T 610182.31mE 4650075.33mN	15T	610182	4.65008e+06	98516727	2021-10-17	2021-10-17 13:09:47 UTC	briannastarry	research	41.995	-91.6697	Boisea trivittata	Eastern Boxelder Bug	53227	Animalia	Arthropoda	Insecta	Hemiptera	Rhopalidae	Boisea	Boisea trivittata
433	15T 609981.57mE 4649586.01mN	15T	609982	4.64959e+06	86504280	2021-07-10	2021-07-10 21:16:30 UTC	dannyhughes	research	41.9906	-91.6722	Cyprinus carpio	European Carp	53911	Animalia	Chordata	Actinopterygii	Cypriniformes	Cyprinidae	Cyprinus	Cyprinus carpio
568	15T 610539.13mE 4649633.35mN	15T	610539	4.64963e+06	92811790	2021-08-21	2021-08-21 20:16:58 UTC	sangai	research	41.991	-91.6655	Cyprinus carpio	European Carp	53911	Animalia	Chordata	Actinopterygii	Cypriniformes	Cyprinidae	Cyprinus	Cyprinus carpio
754	15T 609971.90mE 4650133.31mN	15T	609972	4.65013e+06	98428944	2021-10-16	2021-10-16 14:12:44 UTC	kiilycook	research	41.9955	-91.6722	Juglans nigra	eastern black walnut	54504	Plantae	Tracheophyta	Magnoliopsida	Fagales	Juglandaceae	Juglans	Juglans nigra
757	15T 610350.19mE 4649995.89mN	15T	610350	4.65e+06	98433069	2021-09-25	2021-09-25 15:11:50 UTC	jaclynadams	research	41.9942	-91.6677	Gleditsia triacanthos	honey locust	54797	Plantae	Tracheophyta	Magnoliopsida	Fabales	Fabaceae	Gleditsia	Gleditsia triacanthos
61	15T 610349.17mE 4649373.11mN	15T	610349	4.64937e+06	75056013	2021-04-24	2021-04-24 11:46:50 UTC	kalina_sq	research	41.9886	-91.6678	Lamium amplexicaule	henbit deadnettle	55459	Plantae	Tracheophyta	Magnoliopsida	Lamiales	Lamiaceae	Lamium	Lamium amplexicaule
646	15T 610558.17mE 4649690.03mN	15T	610558	4.64969e+06	94532249	2021-09-11	2021-09-11 21:24:31 UTC	jaclynadams	research	41.9915	-91.6652	Diabrotica undecimpunctata	Spotted Cucumber Beetle	55487	Animalia	Arthropoda	Insecta	Coleoptera	Chrysomelidae	Diabrotica	Diabrotica undecimpunctata
516	15T 610574.67mE 4649736.42mN	15T	610575	4.64974e+06	92040305	2021-08-21	2021-08-21 23:07:31 UTC	dannyhughes	research	41.9919	-91.665	Oncopeltus fasciatus	Large Milkweed Bug	55556	Animalia	Arthropoda	Insecta	Hemiptera	Lygaeidae	Oncopeltus	Oncopeltus fasciatus
522	15T 610370.80mE 4649961.95mN	15T	610371	4.64996e+06	92041303	2021-08-21	2021-08-21 21:16:24 UTC	samigobeli	research	41.9939	-91.6674	Oncopeltus fasciatus	Large Milkweed Bug	55556	Animalia	Arthropoda	Insecta	Hemiptera	Lygaeidae	Oncopeltus	Oncopeltus fasciatus
656	15T 610068.15mE 4650079.30mN	15T	610068	4.65008e+06	96124700	2021-09-25	2021-09-25 14:15:19 UTC	bianca361	research	41.995	-91.6711	Oncopeltus fasciatus	Large Milkweed Bug	55556	Animalia	Arthropoda	Insecta	Hemiptera	Lygaeidae	Oncopeltus	Oncopeltus fasciatus
657	15T 610070.85mE 4650077.56mN	15T	610071	4.65008e+06	96124717	2021-09-25	2021-09-25 19:15:24 UTC	lgmontero	research	41.995	-91.671	Oncopeltus fasciatus	Large Milkweed Bug	55556	Animalia	Arthropoda	Insecta	Hemiptera	Lygaeidae	Oncopeltus	Oncopeltus fasciatus
660	15T 610065.51mE 4650084.22mN	15T	610066	4.65008e+06	96130155	2021-09-25	2021-09-25 14:53:52 UTC	faithresnick	research	41.9951	-91.6711	Oncopeltus fasciatus	Large Milkweed Bug	55556	Animalia	Arthropoda	Insecta	Hemiptera	Lygaeidae	Oncopeltus	Oncopeltus fasciatus
675	15T 610063.51mE 4650084.38mN	15T	610064	4.65008e+06	96137830	2021-09-25	2021-09-25 14:33:24 UTC	laurvelez	research	41.9951	-91.6711	Oncopeltus fasciatus	Large Milkweed Bug	55556	Animalia	Arthropoda	Insecta	Hemiptera	Lygaeidae	Oncopeltus	Oncopeltus fasciatus
698	15T 610327.76mE 4650027.72mN	15T	610328	4.65003e+06	96161282	2021-09-25	2021-09-25 20:10:10 UTC	dannyhughes	research	41.9945	-91.6679	Oncopeltus fasciatus	Large Milkweed Bug	55556	Animalia	Arthropoda	Insecta	Hemiptera	Lygaeidae	Oncopeltus	Oncopeltus fasciatus
699	15T 610335.49mE 4650015.50mN	15T	610335	4.65002e+06	96161365	2021-09-25	2021-09-25 20:10:05 UTC	dannyhughes	research	41.9944	-91.6679	Oncopeltus fasciatus	Large Milkweed Bug	55556	Animalia	Arthropoda	Insecta	Hemiptera	Lygaeidae	Oncopeltus	Oncopeltus fasciatus
726	15T 610268.33mE 4650056.70mN	15T	610268	4.65006e+06	98113983	2021-09-11	2021-09-11 18:44:44 UTC	dannyhughes	research	41.9948	-91.6687	Oncopeltus fasciatus	Large Milkweed Bug	55556	Animalia	Arthropoda	Insecta	Hemiptera	Lygaeidae	Oncopeltus	Oncopeltus fasciatus
742	15T 610446.07mE 4649443.53mN	15T	610446	4.64944e+06	98407590	2021-10-16	2021-10-16 13:59:07 UTC	gloriamm12	research	41.9893	-91.6666	Oncopeltus fasciatus	Large Milkweed Bug	55556	Animalia	Arthropoda	Insecta	Hemiptera	Lygaeidae	Oncopeltus	Oncopeltus fasciatus
670	15T 610066.32mE 4649538.39mN	15T	610066	4.64954e+06	96136797	2021-09-25	2021-09-25 14:29:15 UTC	teparenteau21	research	41.9902	-91.6712	Solanum dulcamara	bittersweet nightshade	55620	Plantae	Tracheophyta	Magnoliopsida	Solanales	Solanaceae	Solanum	Solanum dulcamara
291	15T 610396.31mE 4649917.05mN	15T	610396	4.64992e+06	82731870	2021-06-12	2021-06-12 14:18:23 UTC	lyssieahern	research	41.9935	-91.6671	Pieris rapae	Cabbage White	55626	Animalia	Arthropoda	Insecta	Lepidoptera	Pieridae	Pieris	Pieris rapae
351	15T 610027.56mE 4650087.53mN	15T	610028	4.65009e+06	84630292	2021-06-26	2021-06-26 16:23:50 UTC	lyssieahern	research	41.9951	-91.6716	Pieris rapae	Cabbage White	55626	Animalia	Arthropoda	Insecta	Lepidoptera	Pieridae	Pieris	Pieris rapae
429	15T 610328.49mE 4650025.86mN	15T	610328	4.65003e+06	86502233	2021-07-10	2021-07-10 19:37:28 UTC	dannyhughes	research	41.9945	-91.6679	Pieris rapae	Cabbage White	55626	Animalia	Arthropoda	Insecta	Lepidoptera	Pieridae	Pieris	Pieris rapae
453	15T 610410.88mE 4649992.49mN	15T	610411	4.64999e+06	86510078	2021-07-10	2021-07-10 21:34:34 UTC	jaclynadams	research	41.9942	-91.667	Pieris rapae	Cabbage White	55626	Animalia	Arthropoda	Insecta	Lepidoptera	Pieridae	Pieris	Pieris rapae
458	15T 610368.11mE 4649978.06mN	15T	610368	4.64998e+06	86515130	2021-07-10	2021-07-10 14:28:22 UTC	lyssieahern	research	41.9941	-91.6675	Pieris rapae	Cabbage White	55626	Animalia	Arthropoda	Insecta	Lepidoptera	Pieridae	Pieris	Pieris rapae
464	15T 609978.27mE 4650122.85mN	15T	609978	4.65012e+06	86515661	2021-07-10	2021-07-10 15:38:39 UTC	lyssieahern	research	41.9954	-91.6722	Pieris rapae	Cabbage White	55626	Animalia	Arthropoda	Insecta	Lepidoptera	Pieridae	Pieris	Pieris rapae
528	15T 610165.06mE 4650080.07mN	15T	610165	4.65008e+06	92042130	2021-08-21	2021-08-21 21:43:49 UTC	samigobeli	research	41.995	-91.6699	Pieris rapae	Cabbage White	55626	Animalia	Arthropoda	Insecta	Lepidoptera	Pieridae	Pieris	Pieris rapae
549	15T 610316.41mE 4650025.59mN	15T	610316	4.65003e+06	92047086	2021-08-21	2021-08-21 19:26:24 UTC	dannyhughes	research	41.9945	-91.6681	Pieris rapae	Cabbage White	55626	Animalia	Arthropoda	Insecta	Lepidoptera	Pieridae	Pieris	Pieris rapae
576	15T 610349.16mE 4650009.54mN	15T	610349	4.65001e+06	92832227	2021-08-21	2021-08-21 19:53:28 UTC	sangai	research	41.9944	-91.6677	Pieris rapae	Cabbage White	55626	Animalia	Arthropoda	Insecta	Lepidoptera	Pieridae	Pieris	Pieris rapae
593	15T 610372.33mE 4649980.20mN	15T	610372	4.64998e+06	92836205	2021-08-28	2021-08-28 18:06:53 UTC	dannyhughes	research	41.9941	-91.6674	Pieris rapae	Cabbage White	55626	Animalia	Arthropoda	Insecta	Lepidoptera	Pieridae	Pieris	Pieris rapae
653	15T 610319.83mE 4650029.51mN	15T	610320	4.65003e+06	94532968	2021-09-11	2021-09-11 17:59:56 UTC	dannyhughes	research	41.9946	-91.668	Pieris rapae	Cabbage White	55626	Animalia	Arthropoda	Insecta	Lepidoptera	Pieridae	Pieris	Pieris rapae
702	15T 610303.14mE 4650043.12mN	15T	610303	4.65004e+06	96161684	2021-09-25	2021-09-25 19:42:56 UTC	dannyhughes	research	41.9947	-91.6682	Pieris rapae	Cabbage White	55626	Animalia	Arthropoda	Insecta	Lepidoptera	Pieridae	Pieris	Pieris rapae
774	15T 610274.28mE 4650068.51mN	15T	610274	4.65007e+06	98517869	2021-10-17	2021-10-17 13:18:33 UTC	briannastarry	research	41.9949	-91.6686	Pieris rapae	Cabbage White	55626	Animalia	Arthropoda	Insecta	Lepidoptera	Pieridae	Pieris	Pieris rapae
779	15T 610283.19mE 4650066.51mN	15T	610283	4.65007e+06	98614919	2021-10-16	2021-10-16 14:42:19 UTC	joely98	research	41.9949	-91.6685	Pieris rapae	Cabbage White	55626	Animalia	Arthropoda	Insecta	Lepidoptera	Pieridae	Pieris	Pieris rapae
709	15T 610334.44mE 4650027.88mN	15T	610334	4.65003e+06	96183590	2021-09-25	2021-09-25 19:59:47 UTC	jaclynadams	research	41.9945	-91.6679	Eristalis tenax	Common Drone Fly	55719	Animalia	Arthropoda	Insecta	Diptera	Syrphidae	Eristalis	Eristalis tenax
42	15T 610524.80mE 4649622.33mN	15T	610525	4.64962e+06	75052707	2021-04-24	2021-04-24 11:19:11 UTC	kalina_sq	research	41.9909	-91.6656	Veronica arvensis	corn speedwell	55748	Plantae	Tracheophyta	Magnoliopsida	Lamiales	Plantaginaceae	Veronica	Veronica arvensis
25	15T 609937.28mE 4650156.97mN	15T	609937	4.65016e+06	75050971	2021-04-24	2021-04-24 11:14:26 UTC	natalie_prow	research	41.9958	-91.6726	Glechoma hederacea	ground-ivy	55830	Plantae	Tracheophyta	Magnoliopsida	Lamiales	Lamiaceae	Glechoma	Glechoma hederacea
29	15T 610485.79mE 4649558.79mN	15T	610486	4.64956e+06	75051413	2021-04-24	2021-04-24 16:17:35 UTC	cjmaldonado	research	41.9903	-91.6661	Glechoma hederacea	ground-ivy	55830	Plantae	Tracheophyta	Magnoliopsida	Lamiales	Lamiaceae	Glechoma	Glechoma hederacea
28	15T 609825.83mE 4650040.94mN	15T	609826	4.65004e+06	75051398	2021-04-24	2021-04-24 11:17:54 UTC	natalie_prow	research	41.9947	-91.674	Alliaria petiolata	garlic mustard	56061	Plantae	Tracheophyta	Magnoliopsida	Brassicales	Brassicaceae	Alliaria	Alliaria petiolata
76	15T 610014.35mE 4649577.38mN	15T	610014	4.64958e+06	75059720	2021-04-24	2021-04-24 12:13:44 UTC	kalina_sq	research	41.9905	-91.6718	Armadillidium vulgare	Common Pill Woodlouse	56083	Animalia	Arthropoda	Malacostraca	Isopoda	Armadillidiidae	Armadillidium	Armadillidium vulgare
188	15T 610326.08mE 4650022.73mN	15T	610326	4.65002e+06	78854465	2021-05-15	2021-05-15 16:34:15 UTC	dannyhughes	research	41.9945	-91.668	Armadillidium vulgare	Common Pill Woodlouse	56083	Animalia	Arthropoda	Malacostraca	Isopoda	Armadillidiidae	Armadillidium	Armadillidium vulgare
327	15T 610013.96mE 4649595.94mN	15T	610014	4.6496e+06	82762635	2021-06-12	2021-06-12 21:31:55 UTC	dannyhughes	research	41.9907	-91.6718	Armadillidium vulgare	Common Pill Woodlouse	56083	Animalia	Arthropoda	Malacostraca	Isopoda	Armadillidiidae	Armadillidium	Armadillidium vulgare
348	15T 610230.94mE 4649460.36mN	15T	610231	4.64946e+06	84629734	2021-06-26	2021-06-26 22:08:13 UTC	dannyhughes	research	41.9894	-91.6692	Armadillidium vulgare	Common Pill Woodlouse	56083	Animalia	Arthropoda	Malacostraca	Isopoda	Armadillidiidae	Armadillidium	Armadillidium vulgare
349	15T 610257.61mE 4650077.59mN	15T	610258	4.65008e+06	84630205	2021-06-26	2021-06-26 16:15:57 UTC	lyssieahern	research	41.995	-91.6688	Armadillidium vulgare	Common Pill Woodlouse	56083	Animalia	Arthropoda	Malacostraca	Isopoda	Armadillidiidae	Armadillidium	Armadillidium vulgare
411	15T 610515.83mE 4649811.43mN	15T	610516	4.64981e+06	86482271	2021-07-10	2021-07-10 21:56:00 UTC	dannyhughes	research	41.9926	-91.6657	Armadillidium vulgare	Common Pill Woodlouse	56083	Animalia	Arthropoda	Malacostraca	Isopoda	Armadillidiidae	Armadillidium	Armadillidium vulgare
542	15T 609972.64mE 4650141.39mN	15T	609973	4.65014e+06	92044532	2021-08-21	2021-08-21 21:48:25 UTC	dannyhughes	research	41.9956	-91.6722	Armadillidium vulgare	Common Pill Woodlouse	56083	Animalia	Arthropoda	Malacostraca	Isopoda	Armadillidiidae	Armadillidium	Armadillidium vulgare
620	15T 610280.37mE 4649445.70mN	15T	610280	4.64945e+06	94529332	2021-09-11	2021-09-11 21:38:19 UTC	dannyhughes	research	41.9893	-91.6686	Armadillidium vulgare	Common Pill Woodlouse	56083	Animalia	Arthropoda	Malacostraca	Isopoda	Armadillidiidae	Armadillidium	Armadillidium vulgare
769	15T 610349.74mE 4649996.13mN	15T	610350	4.65e+06	98440144	2021-10-16	2021-10-16 18:12:12 UTC	dannyhughes	research	41.9942	-91.6677	Armadillidium vulgare	Common Pill Woodlouse	56083	Animalia	Arthropoda	Malacostraca	Isopoda	Armadillidiidae	Armadillidium	Armadillidium vulgare
770	15T 610404.86mE 4650031.94mN	15T	610405	4.65003e+06	98440334	2021-10-16	2021-10-16 19:09:03 UTC	dannyhughes	research	41.9946	-91.667	Armadillidium vulgare	Common Pill Woodlouse	56083	Animalia	Arthropoda	Malacostraca	Isopoda	Armadillidiidae	Armadillidium	Armadillidium vulgare
27	15T 610573.81mE 4649711.94mN	15T	610574	4.64971e+06	75051367	2021-04-24	2021-04-24 11:13:23 UTC	kalina_sq	research	41.9917	-91.665	Barbarea vulgaris	garden yellowrocket	56126	Plantae	Tracheophyta	Magnoliopsida	Brassicales	Brassicaceae	Barbarea	Barbarea vulgaris
598	15T 610355.37mE 4650000.75mN	15T	610355	4.65e+06	92837654	2021-08-28	2021-08-28 17:22:14 UTC	dannyhughes	research	41.9943	-91.6676	Bombus pensylvanicus	American Bumble Bee	56887	Animalia	Arthropoda	Insecta	Hymenoptera	Apidae	Bombus	Bombus pensylvanicus
258	15T 610301.58mE 4650063.03mN	15T	610302	4.65006e+06	81438026	2021-06-03	2021-06-03 15:11:48 UTC	lrachela	research	41.9949	-91.6683	Melilotus officinalis	Yellow Sweetclover	57066	Plantae	Tracheophyta	Magnoliopsida	Fabales	Fabaceae	Melilotus	Melilotus officinalis
262	15T 609890.31mE 4649846.99mN	15T	609890	4.64985e+06	81771918	2021-06-05	2021-06-05 13:49:16 UTC	lyssieahern	research	41.993	-91.6733	Melilotus officinalis	Yellow Sweetclover	57066	Plantae	Tracheophyta	Magnoliopsida	Fabales	Fabaceae	Melilotus	Melilotus officinalis
307	15T 610239.97mE 4650075.65mN	15T	610240	4.65008e+06	82760209	2021-06-12	2021-06-12 15:06:13 UTC	lyssieahern	research	41.995	-91.669	Bromus tectorum	Cheatgrass	58369	Plantae	Tracheophyta	Liliopsida	Poales	Poaceae	Bromus	Bromus tectorum
519	15T 609977.13mE 4649619.71mN	15T	609977	4.64962e+06	92040884	2021-08-21	2021-08-21 22:45:05 UTC	dannyhughes	research	41.9909	-91.6723	Pholisora catullus	Common Sootywing	58479	Animalia	Arthropoda	Insecta	Lepidoptera	Hesperiidae	Pholisora	Pholisora catullus
563	15T 610013.61mE 4649565.33mN	15T	610014	4.64957e+06	92406059	2021-08-21	2021-08-21 22:44:16 UTC	sangai	research	41.9904	-91.6718	Pholisora catullus	Common Sootywing	58479	Animalia	Arthropoda	Insecta	Lepidoptera	Hesperiidae	Pholisora	Pholisora catullus
417	15T 610368.13mE 4649378.08mN	15T	610368	4.64938e+06	86484064	2021-07-10	2021-07-10 21:30:27 UTC	dannyhughes	research	41.9887	-91.6676	Papilio polyxenes	Black Swallowtail	58523	Animalia	Arthropoda	Insecta	Lepidoptera	Papilionidae	Papilio	Papilio polyxenes
512	15T 610326.87mE 4650032.38mN	15T	610327	4.65003e+06	92007334	2021-08-21	2021-08-21 14:48:14 UTC	laduron20	research	41.9946	-91.668	Papilio polyxenes	Black Swallowtail	58523	Animalia	Arthropoda	Insecta	Lepidoptera	Papilionidae	Papilio	Papilio polyxenes
513	15T 610325.18mE 4650034.43mN	15T	610325	4.65003e+06	92009131	2021-08-21	2021-08-21 14:48:38 UTC	laduron20	research	41.9946	-91.668	Papilio polyxenes	Black Swallowtail	58523	Animalia	Arthropoda	Insecta	Lepidoptera	Papilionidae	Papilio	Papilio polyxenes
529	15T 609790.26mE 4650122.23mN	15T	609790	4.65012e+06	92042667	2021-08-21	2021-08-21 22:05:57 UTC	dannyhughes	research	41.9955	-91.6744	Papilio polyxenes	Black Swallowtail	58523	Animalia	Arthropoda	Insecta	Lepidoptera	Papilionidae	Papilio	Papilio polyxenes
561	15T 610305.65mE 4650042.04mN	15T	610306	4.65004e+06	92049162	2021-08-21	2021-08-21 19:17:00 UTC	dannyhughes	research	41.9947	-91.6682	Papilio polyxenes	Black Swallowtail	58523	Animalia	Arthropoda	Insecta	Lepidoptera	Papilionidae	Papilio	Papilio polyxenes
517	15T 610381.88mE 4649348.77mN	15T	610382	4.64935e+06	92040460	2021-08-21	2021-08-21 22:55:32 UTC	dannyhughes	research	41.9884	-91.6674	Limenitis archippus	Viceroy	58586	Animalia	Arthropoda	Insecta	Lepidoptera	Nymphalidae	Limenitis	Limenitis archippus
207	15T 610097.33mE 4650073.21mN	15T	610097	4.65007e+06	78909567	2021-05-15	2021-05-15 17:14:13 UTC	jaclynadams	research	41.995	-91.6707	Lepomis cyanellus	Green Sunfish	58636	Animalia	Chordata	Actinopterygii	Centrarchiformes	Centrarchidae	Lepomis	Lepomis cyanellus
225	15T 609831.26mE 4650102.44mN	15T	609831	4.6501e+06	80534450	2021-05-27	2021-05-27 13:51:15 UTC	lyssieahern	research	41.9953	-91.6739	Lepomis cyanellus	Green Sunfish	58636	Animalia	Chordata	Actinopterygii	Centrarchiformes	Centrarchidae	Lepomis	Lepomis cyanellus
226	15T 609833.19mE 4650102.47mN	15T	609833	4.6501e+06	80534561	2021-05-27	2021-05-27 13:51:27 UTC	lyssieahern	research	41.9953	-91.6739	Lepomis cyanellus	Green Sunfish	58636	Animalia	Chordata	Actinopterygii	Centrarchiformes	Centrarchidae	Lepomis	Lepomis cyanellus
227	15T 609862.80mE 4650072.01mN	15T	609863	4.65007e+06	80534679	2021-05-27	2021-05-27 13:58:11 UTC	lyssieahern	research	41.995	-91.6736	Lepomis cyanellus	Green Sunfish	58636	Animalia	Chordata	Actinopterygii	Centrarchiformes	Centrarchidae	Lepomis	Lepomis cyanellus
244	15T 609840.34mE 4650095.73mN	15T	609840	4.6501e+06	80816567	2021-05-29	2021-05-29 16:05:14 UTC	lyssieahern	research	41.9952	-91.6738	Lepomis cyanellus	Green Sunfish	58636	Animalia	Chordata	Actinopterygii	Centrarchiformes	Centrarchidae	Lepomis	Lepomis cyanellus
255	15T 609833.35mE 4650094.51mN	15T	609833	4.65009e+06	80980953	2021-05-30	2021-05-30 23:26:45 UTC	dannyhughes	research	41.9952	-91.6739	Lepomis cyanellus	Green Sunfish	58636	Animalia	Chordata	Actinopterygii	Centrarchiformes	Centrarchidae	Lepomis	Lepomis cyanellus
317	15T 610539.67mE 4649628.12mN	15T	610540	4.64963e+06	82761869	2021-06-12	2021-06-12 15:57:32 UTC	lyssieahern	research	41.9909	-91.6655	Lepomis cyanellus	Green Sunfish	58636	Animalia	Chordata	Actinopterygii	Centrarchiformes	Centrarchidae	Lepomis	Lepomis cyanellus
318	15T 610538.97mE 4649629.03mN	15T	610539	4.64963e+06	82761942	2021-06-12	2021-06-12 15:57:36 UTC	lyssieahern	research	41.9909	-91.6655	Lepomis cyanellus	Green Sunfish	58636	Animalia	Chordata	Actinopterygii	Centrarchiformes	Centrarchidae	Lepomis	Lepomis cyanellus
319	15T 610538.56mE 4649628.65mN	15T	610539	4.64963e+06	82762003	2021-06-12	2021-06-12 15:57:53 UTC	lyssieahern	research	41.9909	-91.6655	Lepomis cyanellus	Green Sunfish	58636	Animalia	Chordata	Actinopterygii	Centrarchiformes	Centrarchidae	Lepomis	Lepomis cyanellus
320	15T 610537.87mE 4649628.64mN	15T	610538	4.64963e+06	82762029	2021-06-12	2021-06-12 15:58:02 UTC	lyssieahern	research	41.9909	-91.6655	Lepomis cyanellus	Green Sunfish	58636	Animalia	Chordata	Actinopterygii	Centrarchiformes	Centrarchidae	Lepomis	Lepomis cyanellus
370	15T 610545.58mE 4649618.78mN	15T	610546	4.64962e+06	84632821	2021-06-26	2021-06-26 20:06:30 UTC	dannyhughes	research	41.9908	-91.6654	Lepomis cyanellus	Green Sunfish	58636	Animalia	Chordata	Actinopterygii	Centrarchiformes	Centrarchidae	Lepomis	Lepomis cyanellus
590	15T 610547.32mE 4649623.82mN	15T	610547	4.64962e+06	92834605	2021-08-28	2021-08-28 18:32:33 UTC	dannyhughes	research	41.9909	-91.6654	Lepomis cyanellus	Green Sunfish	58636	Animalia	Chordata	Actinopterygii	Centrarchiformes	Centrarchidae	Lepomis	Lepomis cyanellus
612	15T 610537.62mE 4649636.19mN	15T	610538	4.64964e+06	94483428	2021-09-11	2021-09-11 15:02:50 UTC	shion2	research	41.991	-91.6655	Lepomis cyanellus	Green Sunfish	58636	Animalia	Chordata	Actinopterygii	Centrarchiformes	Centrarchidae	Lepomis	Lepomis cyanellus
481	15T 610561.81mE 4649654.26mN	15T	610562	4.64965e+06	87889884	2021-07-20	2021-07-20 18:13:45 UTC	dannyhughes	research	41.9911	-91.6652	Ameiurus natalis	Yellow Bullhead	58657	Animalia	Chordata	Actinopterygii	Siluriformes	Ictaluridae	Ameiurus	Ameiurus natalis
235	15T 610470.52mE 4650164.37mN	15T	610471	4.65016e+06	80803113	2021-05-29	2021-05-29 21:01:09 UTC	robbie16	research	41.9957	-91.6662	Toxicodendron radicans	poison ivy	58732	Plantae	Tracheophyta	Magnoliopsida	Sapindales	Anacardiaceae	Toxicodendron	Toxicodendron radicans
337	15T 610319.70mE 4650036.16mN	15T	610320	4.65004e+06	84597314	2021-06-26	2021-06-26 14:32:28 UTC	lyssieahern	research	41.9946	-91.668	Melilotus albus	White Sweetclover	58907	Plantae	Tracheophyta	Magnoliopsida	Fabales	Fabaceae	Melilotus	Melilotus albus
0	15T 610267.49mE 4650066.88mN	15T	610267	4.65007e+06	72969838	2021-04-03	2021-04-03 15:28:20 UTC	kalina_sq	research	41.9949	-91.6687	Verbascum thapsus	great mullein	59029	Plantae	Tracheophyta	Magnoliopsida	Lamiales	Scrophulariaceae	Verbascum	Verbascum thapsus
8	15T 610235.90mE 4650074.56mN	15T	610236	4.65007e+06	74943379	2021-04-23	2021-04-23 11:48:30 UTC	peytynshevchuk	research	41.995	-91.669	Verbascum thapsus	great mullein	59029	Plantae	Tracheophyta	Magnoliopsida	Lamiales	Scrophulariaceae	Verbascum	Verbascum thapsus
17	15T 610239.31mE 4650079.08mN	15T	610239	4.65008e+06	75049252	2021-04-24	2021-04-24 11:01:10 UTC	janielle_cobler	research	41.995	-91.669	Verbascum thapsus	great mullein	59029	Plantae	Tracheophyta	Magnoliopsida	Lamiales	Scrophulariaceae	Verbascum	Verbascum thapsus
63	15T 610342.44mE 4649416.79mN	15T	610342	4.64942e+06	75056338	2021-04-24	2021-04-24 16:44:26 UTC	cjmaldonado	research	41.989	-91.6679	Verbascum thapsus	great mullein	59029	Plantae	Tracheophyta	Magnoliopsida	Lamiales	Scrophulariaceae	Verbascum	Verbascum thapsus
75	15T 610277.06mE 4650073.37mN	15T	610277	4.65007e+06	75059277	2021-04-24	2021-04-24 12:12:58 UTC	noahgrow	research	41.995	-91.6686	Verbascum thapsus	great mullein	59029	Plantae	Tracheophyta	Magnoliopsida	Lamiales	Scrophulariaceae	Verbascum	Verbascum thapsus
95	15T 610184.71mE 4650083.90mN	15T	610185	4.65008e+06	75062626	2021-04-24	2021-04-24 12:36:38 UTC	ckeller2020	research	41.9951	-91.6697	Verbascum thapsus	great mullein	59029	Plantae	Tracheophyta	Magnoliopsida	Lamiales	Scrophulariaceae	Verbascum	Verbascum thapsus
98	15T 610170.83mE 4650078.09mN	15T	610171	4.65008e+06	75062705	2021-04-24	2021-04-24 12:37:05 UTC	peculiar	research	41.995	-91.6698	Verbascum thapsus	great mullein	59029	Plantae	Tracheophyta	Magnoliopsida	Lamiales	Scrophulariaceae	Verbascum	Verbascum thapsus
101	15T 610286.99mE 4649551.81mN	15T	610287	4.64955e+06	75062944	2021-04-24	2021-04-24 12:18:10 UTC	ashna_k	research	41.9903	-91.6685	Verbascum thapsus	great mullein	59029	Plantae	Tracheophyta	Magnoliopsida	Lamiales	Scrophulariaceae	Verbascum	Verbascum thapsus
104	15T 609899.20mE 4649775.19mN	15T	609899	4.64978e+06	75063643	2021-04-24	2021-04-24 12:40:55 UTC	kalina_sq	research	41.9923	-91.6732	Verbascum thapsus	great mullein	59029	Plantae	Tracheophyta	Magnoliopsida	Lamiales	Scrophulariaceae	Verbascum	Verbascum thapsus
107	15T 610173.45mE 4650074.31mN	15T	610173	4.65007e+06	75064816	2021-04-24	2021-04-24 17:21:24 UTC	samigobeli	research	41.995	-91.6698	Verbascum thapsus	great mullein	59029	Plantae	Tracheophyta	Magnoliopsida	Lamiales	Scrophulariaceae	Verbascum	Verbascum thapsus
119	15T 610236.89mE 4650078.19mN	15T	610237	4.65008e+06	75073552	2021-04-24	2021-04-24 12:52:39 UTC	meagan_harvey	research	41.995	-91.669	Verbascum thapsus	great mullein	59029	Plantae	Tracheophyta	Magnoliopsida	Lamiales	Scrophulariaceae	Verbascum	Verbascum thapsus
120	15T 610236.89mE 4650078.19mN	15T	610237	4.65008e+06	75074237	2021-04-24	2021-04-24 12:52:39 UTC	meagan_harvey	research	41.995	-91.669	Verbascum thapsus	great mullein	59029	Plantae	Tracheophyta	Magnoliopsida	Lamiales	Scrophulariaceae	Verbascum	Verbascum thapsus
123	15T 609988.85mE 4650116.31mN	15T	609989	4.65012e+06	75078869	2021-04-24	2021-04-24 12:29:22 UTC	laurvelez	research	41.9954	-91.672	Verbascum thapsus	great mullein	59029	Plantae	Tracheophyta	Magnoliopsida	Lamiales	Scrophulariaceae	Verbascum	Verbascum thapsus
157	15T 610182.59mE 4650080.68mN	15T	610183	4.65008e+06	75094117	2021-04-24	2021-04-24 12:53:35 UTC	audreyt123	research	41.995	-91.6697	Verbascum thapsus	great mullein	59029	Plantae	Tracheophyta	Magnoliopsida	Lamiales	Scrophulariaceae	Verbascum	Verbascum thapsus
177	15T 610286.99mE 4649551.81mN	15T	610287	4.64955e+06	76269691	2021-04-28	2021-04-28 23:48:28 UTC	delaney_throckmorton	research	41.9903	-91.6685	Verbascum thapsus	great mullein	59029	Plantae	Tracheophyta	Magnoliopsida	Lamiales	Scrophulariaceae	Verbascum	Verbascum thapsus
185	15T 610237.81mE 4650064.36mN	15T	610238	4.65006e+06	78847852	2021-05-15	2021-05-15 11:02:43 UTC	yellowamv	research	41.9949	-91.669	Verbascum thapsus	great mullein	59029	Plantae	Tracheophyta	Magnoliopsida	Lamiales	Scrophulariaceae	Verbascum	Verbascum thapsus
282	15T 610359.68mE 4650092.34mN	15T	610360	4.65009e+06	82727090	2021-06-12	2021-06-12 14:01:49 UTC	laurvelez	research	41.9951	-91.6676	Verbascum thapsus	great mullein	59029	Plantae	Tracheophyta	Magnoliopsida	Lamiales	Scrophulariaceae	Verbascum	Verbascum thapsus
467	15T 609814.38mE 4649979.64mN	15T	609814	4.64998e+06	86515763	2021-07-10	2021-07-10 16:02:01 UTC	lyssieahern	research	41.9942	-91.6742	Verbascum thapsus	great mullein	59029	Plantae	Tracheophyta	Magnoliopsida	Lamiales	Scrophulariaceae	Verbascum	Verbascum thapsus
510	15T 610501.95mE 4649557.89mN	15T	610502	4.64956e+06	88901758	2021-07-24	2021-07-24 19:53:35 UTC	myranda_hadley	research	41.9903	-91.6659	Verbascum thapsus	great mullein	59029	Plantae	Tracheophyta	Magnoliopsida	Lamiales	Scrophulariaceae	Verbascum	Verbascum thapsus
684	15T 610214.14mE 4650076.54mN	15T	610214	4.65008e+06	96142212	2021-09-25	2021-09-25 15:45:44 UTC	joely98	research	41.995	-91.6693	Verbascum thapsus	great mullein	59029	Plantae	Tracheophyta	Magnoliopsida	Lamiales	Scrophulariaceae	Verbascum	Verbascum thapsus
731	15T 609824.14mE 4649967.36mN	15T	609824	4.64997e+06	98403775	2021-10-16	2021-10-16 13:23:51 UTC	anja280	research	41.9941	-91.674	Verbascum thapsus	great mullein	59029	Plantae	Tracheophyta	Magnoliopsida	Lamiales	Scrophulariaceae	Verbascum	Verbascum thapsus
746	15T 610297.44mE 4650062.19mN	15T	610297	4.65006e+06	98417385	2021-10-16	2021-10-16 14:54:52 UTC	caitlinev	research	41.9949	-91.6683	Verbascum thapsus	great mullein	59029	Plantae	Tracheophyta	Magnoliopsida	Lamiales	Scrophulariaceae	Verbascum	Verbascum thapsus
772	15T 610220.57mE 4650074.66mN	15T	610221	4.65007e+06	98516299	2021-10-17	2021-10-17 13:06:43 UTC	briannastarry	research	41.995	-91.6692	Verbascum thapsus	great mullein	59029	Plantae	Tracheophyta	Magnoliopsida	Lamiales	Scrophulariaceae	Verbascum	Verbascum thapsus
778	15T 610160.79mE 4649861.19mN	15T	610161	4.64986e+06	98609886	2021-10-16	2021-10-16 21:04:11 UTC	mirowe21	research	41.9931	-91.67	Verbascum thapsus	great mullein	59029	Plantae	Tracheophyta	Magnoliopsida	Lamiales	Scrophulariaceae	Verbascum	Verbascum thapsus
536	15T 609878.33mE 4650146.92mN	15T	609878	4.65015e+06	92043690	2021-08-21	2021-08-21 21:56:09 UTC	dannyhughes	research	41.9957	-91.6734	Aquarius remigis	Common Water Strider	59651	Animalia	Arthropoda	Insecta	Hemiptera	Gerridae	Aquarius	Aquarius remigis
732	15T 609870.26mE 4650137.57mN	15T	609870	4.65014e+06	98404338	2021-10-16	2021-10-16 08:30:08 UTC	gloriamm12	research	41.9956	-91.6735	Pyrrharctia isabella	Isabella Tiger Moth	59675	Animalia	Arthropoda	Insecta	Lepidoptera	Erebidae	Pyrrharctia	Pyrrharctia isabella
733	15T 609853.25mE 4650128.20mN	15T	609853	4.65013e+06	98404487	2021-10-16	2021-10-16 13:30:58 UTC	gloriamm12	research	41.9955	-91.6737	Pyrrharctia isabella	Isabella Tiger Moth	59675	Animalia	Arthropoda	Insecta	Lepidoptera	Erebidae	Pyrrharctia	Pyrrharctia isabella
734	15T 609851.81mE 4650127.46mN	15T	609852	4.65013e+06	98404618	2021-10-16	2021-10-16 13:30:34 UTC	mknoche	research	41.9955	-91.6737	Pyrrharctia isabella	Isabella Tiger Moth	59675	Animalia	Arthropoda	Insecta	Lepidoptera	Erebidae	Pyrrharctia	Pyrrharctia isabella
735	15T 609851.13mE 4650137.33mN	15T	609851	4.65014e+06	98404629	2021-10-16	2021-10-16 18:30:55 UTC	claire_preheim	research	41.9956	-91.6737	Pyrrharctia isabella	Isabella Tiger Moth	59675	Animalia	Arthropoda	Insecta	Lepidoptera	Erebidae	Pyrrharctia	Pyrrharctia isabella
737	15T 609787.25mE 4650056.79mN	15T	609787	4.65006e+06	98405306	2021-10-16	2021-10-16 13:38:07 UTC	anja280	research	41.9949	-91.6745	Pyrrharctia isabella	Isabella Tiger Moth	59675	Animalia	Arthropoda	Insecta	Lepidoptera	Erebidae	Pyrrharctia	Pyrrharctia isabella
750	15T 609845.13mE 4649910.47mN	15T	609845	4.64991e+06	98419042	2021-10-16	2021-10-16 15:55:49 UTC	faithresnick	research	41.9935	-91.6738	Pyrrharctia isabella	Isabella Tiger Moth	59675	Animalia	Arthropoda	Insecta	Lepidoptera	Erebidae	Pyrrharctia	Pyrrharctia isabella
276	15T 610340.50mE 4650002.90mN	15T	610340	4.65e+06	82724773	2021-06-12	2021-06-12 13:57:52 UTC	lyssieahern	research	41.9943	-91.6678	Perithemis tenera	Eastern Amberwing	59776	Animalia	Arthropoda	Insecta	Odonata	Libellulidae	Perithemis	Perithemis tenera
277	15T 610336.23mE 4650007.25mN	15T	610336	4.65001e+06	82724902	2021-06-12	2021-06-12 08:58:56 UTC	lyssieahern	research	41.9944	-91.6679	Perithemis tenera	Eastern Amberwing	59776	Animalia	Arthropoda	Insecta	Odonata	Libellulidae	Perithemis	Perithemis tenera
418	15T 609891.15mE 4649787.89mN	15T	609891	4.64979e+06	86484355	2021-07-10	2021-07-10 21:08:34 UTC	dannyhughes	research	41.9924	-91.6733	Perithemis tenera	Eastern Amberwing	59776	Animalia	Arthropoda	Insecta	Odonata	Libellulidae	Perithemis	Perithemis tenera
547	15T 610293.03mE 4650041.07mN	15T	610293	4.65004e+06	92046439	2021-08-21	2021-08-21 19:51:03 UTC	dannyhughes	research	41.9947	-91.6684	Perithemis tenera	Eastern Amberwing	59776	Animalia	Arthropoda	Insecta	Odonata	Libellulidae	Perithemis	Perithemis tenera
648	15T 610357.73mE 4649981.24mN	15T	610358	4.64998e+06	94532558	2021-09-11	2021-09-11 18:13:39 UTC	dannyhughes	research	41.9941	-91.6676	Perithemis tenera	Eastern Amberwing	59776	Animalia	Arthropoda	Insecta	Odonata	Libellulidae	Perithemis	Perithemis tenera
403	15T 610376.29mE 4649900.02mN	15T	610376	4.6499e+06	86236199	2021-07-08	2021-07-08 21:40:48 UTC	nikki116	research	41.9934	-91.6674	Lythrum salicaria	purple loosestrife	61321	Plantae	Tracheophyta	Magnoliopsida	Myrtales	Lythraceae	Lythrum	Lythrum salicaria
445	15T 610539.86mE 4649674.41mN	15T	610540	4.64967e+06	86507585	2021-07-10	2021-07-10 21:44:09 UTC	jaclynadams	research	41.9913	-91.6655	Lythrum salicaria	purple loosestrife	61321	Plantae	Tracheophyta	Magnoliopsida	Myrtales	Lythraceae	Lythrum	Lythrum salicaria
524	15T 609840.66mE 4650093.88mN	15T	609841	4.65009e+06	92041525	2021-08-21	2021-08-21 22:13:40 UTC	dannyhughes	research	41.9952	-91.6738	Erythemis simplicicollis	Eastern Pondhawk	61495	Animalia	Arthropoda	Insecta	Odonata	Libellulidae	Erythemis	Erythemis simplicicollis
710	15T 610331.62mE 4650025.27mN	15T	610332	4.65003e+06	96352385	2021-09-25	2021-09-25 20:10:48 UTC	jaclynadams	research	41.9945	-91.6679	Lygaeus kalmii	Small Milkweed Bug	62045	Animalia	Arthropoda	Insecta	Hemiptera	Lygaeidae	Lygaeus	Lygaeus kalmii
727	15T 610268.33mE 4650056.70mN	15T	610268	4.65006e+06	98114023	2021-09-11	2021-09-11 18:44:44 UTC	dannyhughes	research	41.9948	-91.6687	Lygaeus kalmii	Small Milkweed Bug	62045	Animalia	Arthropoda	Insecta	Hemiptera	Lygaeidae	Lygaeus	Lygaeus kalmii
743	15T 610025.71mE 4650087.79mN	15T	610026	4.65009e+06	98409129	2021-10-16	2021-10-16 14:13:17 UTC	lexikrestel	research	41.9951	-91.6716	Lygaeus kalmii	Small Milkweed Bug	62045	Animalia	Arthropoda	Insecta	Hemiptera	Lygaeidae	Lygaeus	Lygaeus kalmii
745	15T 610062.46mE 4650085.79mN	15T	610062	4.65009e+06	98416875	2021-10-16	2021-10-16 15:34:59 UTC	faithresnick	research	41.9951	-91.6711	Lygaeus kalmii	Small Milkweed Bug	62045	Animalia	Arthropoda	Insecta	Hemiptera	Lygaeidae	Lygaeus	Lygaeus kalmii
752	15T 610025.43mE 4650091.56mN	15T	610025	4.65009e+06	98428265	2021-10-16	2021-10-16 14:10:29 UTC	kiilycook	research	41.9952	-91.6716	Lygaeus kalmii	Small Milkweed Bug	62045	Animalia	Arthropoda	Insecta	Hemiptera	Lygaeidae	Lygaeus	Lygaeus kalmii
400	15T 610548.74mE 4649644.99mN	15T	610549	4.64964e+06	85040073	2021-06-29	2021-06-29 14:39:24 UTC	laurvelez	research	41.9911	-91.6654	Apalone spinifera spinifera	Northern Spiny Softshell Turtle	62722	Animalia	Chordata	Reptilia	Testudines	Trionychidae	Apalone	Apalone spinifera
359	15T 610043.74mE 4649533.96mN	15T	610044	4.64953e+06	84630809	2021-06-26	2021-06-26 17:01:39 UTC	lyssieahern	research	41.9901	-91.6715	Rudbeckia hirta	black-eyed Susan	62741	Plantae	Tracheophyta	Magnoliopsida	Asterales	Asteraceae	Rudbeckia	Rudbeckia hirta
715	15T 610266.21mE 4650063.29mN	15T	610266	4.65006e+06	97343785	2021-10-05	2021-10-06 00:40:39 UTC	dannyhughes	research	41.9949	-91.6687	Hypercompe scribonia	Giant Leopard Moth	63028	Animalia	Arthropoda	Insecta	Lepidoptera	Erebidae	Hypercompe	Hypercompe scribonia
526	15T 610348.98mE 4649984.66mN	15T	610349	4.64998e+06	92041843	2021-08-21	2021-08-21 21:16:43 UTC	samigobeli	research	41.9941	-91.6677	Melanoplus differentialis	Differential Grasshopper	63518	Animalia	Arthropoda	Insecta	Orthoptera	Acrididae	Melanoplus	Melanoplus differentialis
544	15T 610376.78mE 4649938.64mN	15T	610377	4.64994e+06	92046093	2021-08-21	2021-08-21 20:03:35 UTC	dannyhughes	research	41.9937	-91.6674	Melanoplus differentialis	Differential Grasshopper	63518	Animalia	Arthropoda	Insecta	Orthoptera	Acrididae	Melanoplus	Melanoplus differentialis
556	15T 610371.59mE 4649978.76mN	15T	610372	4.64998e+06	92048428	2021-08-21	2021-08-21 20:00:09 UTC	dannyhughes	research	41.9941	-91.6674	Melanoplus differentialis	Differential Grasshopper	63518	Animalia	Arthropoda	Insecta	Orthoptera	Acrididae	Melanoplus	Melanoplus differentialis
600	15T 610347.82mE 4649994.13mN	15T	610348	4.64999e+06	92838303	2021-08-28	2021-08-28 17:44:41 UTC	dannyhughes	research	41.9942	-91.6677	Melanoplus differentialis	Differential Grasshopper	63518	Animalia	Arthropoda	Insecta	Orthoptera	Acrididae	Melanoplus	Melanoplus differentialis
645	15T 610547.89mE 4649663.33mN	15T	610548	4.64966e+06	94532092	2021-09-11	2021-09-11 21:25:19 UTC	jaclynadams	research	41.9912	-91.6654	Melanoplus differentialis	Differential Grasshopper	63518	Animalia	Arthropoda	Insecta	Orthoptera	Acrididae	Melanoplus	Melanoplus differentialis
647	15T 610393.61mE 4649918.19mN	15T	610394	4.64992e+06	94532252	2021-09-11	2021-09-11 18:20:58 UTC	dannyhughes	research	41.9935	-91.6672	Melanoplus differentialis	Differential Grasshopper	63518	Animalia	Arthropoda	Insecta	Orthoptera	Acrididae	Melanoplus	Melanoplus differentialis
650	15T 610339.68mE 4650014.51mN	15T	610340	4.65001e+06	94532747	2021-09-11	2021-09-11 18:15:20 UTC	dannyhughes	research	41.9944	-91.6678	Melanoplus differentialis	Differential Grasshopper	63518	Animalia	Arthropoda	Insecta	Orthoptera	Acrididae	Melanoplus	Melanoplus differentialis
668	15T 610341.23mE 4650031.11mN	15T	610341	4.65003e+06	96136314	2021-09-25	2021-09-25 15:35:49 UTC	laurvelez	research	41.9946	-91.6678	Melanoplus differentialis	Differential Grasshopper	63518	Animalia	Arthropoda	Insecta	Orthoptera	Acrididae	Melanoplus	Melanoplus differentialis
676	15T 610029.53mE 4650085.15mN	15T	610030	4.65009e+06	96138048	2021-09-25	2021-09-25 15:20:09 UTC	gkerns02	research	41.9951	-91.6715	Melanoplus differentialis	Differential Grasshopper	63518	Animalia	Arthropoda	Insecta	Orthoptera	Acrididae	Melanoplus	Melanoplus differentialis
682	15T 609803.04mE 4650141.08mN	15T	609803	4.65014e+06	96140201	2021-09-25	2021-09-25 15:57:16 UTC	avery131	research	41.9956	-91.6743	Melanoplus differentialis	Differential Grasshopper	63518	Animalia	Arthropoda	Insecta	Orthoptera	Acrididae	Melanoplus	Melanoplus differentialis
691	15T 610362.38mE 4649980.80mN	15T	610362	4.64998e+06	96159447	2021-09-25	2021-09-25 21:51:44 UTC	dannyhughes	research	41.9941	-91.6675	Melanoplus differentialis	Differential Grasshopper	63518	Animalia	Arthropoda	Insecta	Orthoptera	Acrididae	Melanoplus	Melanoplus differentialis
706	15T 610367.53mE 4649981.83mN	15T	610368	4.64998e+06	96162538	2021-09-25	2021-09-25 19:18:50 UTC	dannyhughes	research	41.9941	-91.6675	Melanoplus differentialis	Differential Grasshopper	63518	Animalia	Arthropoda	Insecta	Orthoptera	Acrididae	Melanoplus	Melanoplus differentialis
747	15T 609860.93mE 4650132.78mN	15T	609861	4.65013e+06	98417578	2021-10-16	2021-10-16 15:41:19 UTC	faithresnick	research	41.9955	-91.6736	Melanoplus differentialis	Differential Grasshopper	63518	Animalia	Arthropoda	Insecta	Orthoptera	Acrididae	Melanoplus	Melanoplus differentialis
760	15T 610309.78mE 4650039.68mN	15T	610310	4.65004e+06	98434858	2021-10-16	2021-10-16 19:43:42 UTC	dannyhughes	research	41.9946	-91.6682	Melanoplus differentialis	Differential Grasshopper	63518	Animalia	Arthropoda	Insecta	Orthoptera	Acrididae	Melanoplus	Melanoplus differentialis
767	15T 610306.04mE 4650040.74mN	15T	610306	4.65004e+06	98439438	2021-10-16	2021-10-16 18:24:47 UTC	dannyhughes	research	41.9947	-91.6682	Melanoplus differentialis	Differential Grasshopper	63518	Animalia	Arthropoda	Insecta	Orthoptera	Acrididae	Melanoplus	Melanoplus differentialis
768	15T 610363.13mE 4649977.79mN	15T	610363	4.64998e+06	98440027	2021-10-16	2021-10-16 18:13:10 UTC	dannyhughes	research	41.9941	-91.6675	Melanoplus differentialis	Differential Grasshopper	63518	Animalia	Arthropoda	Insecta	Orthoptera	Acrididae	Melanoplus	Melanoplus differentialis
181	15T 609821.79mE 4650120.07mN	15T	609822	4.65012e+06	78740431	2021-05-14	2021-05-14 12:57:08 UTC	laurvelez	research	41.9954	-91.674	Anaxyrus americanus	American Toad	64968	Animalia	Chordata	Amphibia	Anura	Bufonidae	Anaxyrus	Anaxyrus americanus
352	15T 609871.30mE 4650138.23mN	15T	609871	4.65014e+06	84630324	2021-06-26	2021-06-26 16:29:38 UTC	lyssieahern	research	41.9956	-91.6734	Anaxyrus americanus	American Toad	64968	Animalia	Chordata	Amphibia	Anura	Bufonidae	Anaxyrus	Anaxyrus americanus
363	15T 609852.32mE 4650127.46mN	15T	609852	4.65013e+06	84631302	2021-06-26	2021-06-26 21:30:43 UTC	dannyhughes	research	41.9955	-91.6737	Anaxyrus americanus	American Toad	64968	Animalia	Chordata	Amphibia	Anura	Bufonidae	Anaxyrus	Anaxyrus americanus
530	15T 609909.89mE 4650052.37mN	15T	609910	4.65005e+06	92042875	2021-08-21	2021-08-21 22:03:12 UTC	samigobeli	research	41.9948	-91.673	Anaxyrus americanus	American Toad	64968	Animalia	Chordata	Amphibia	Anura	Bufonidae	Anaxyrus	Anaxyrus americanus
531	15T 609908.62mE 4650060.46mN	15T	609909	4.65006e+06	92042926	2021-08-21	2021-08-21 22:03:14 UTC	samigobeli	research	41.9949	-91.673	Anaxyrus americanus	American Toad	64968	Animalia	Chordata	Amphibia	Anura	Bufonidae	Anaxyrus	Anaxyrus americanus
539	15T 609872.77mE 4650063.24mN	15T	609873	4.65006e+06	92044334	2021-08-21	2021-08-21 22:10:15 UTC	dannyhughes	research	41.9949	-91.6734	Anaxyrus americanus	American Toad	64968	Animalia	Chordata	Amphibia	Anura	Bufonidae	Anaxyrus	Anaxyrus americanus
721	15T 609871.30mE 4650093.50mN	15T	609871	4.65009e+06	97482156	2021-08-21	2021-08-21 22:03:00 UTC	emilylarosa	research	41.9952	-91.6734	Anaxyrus americanus	American Toad	64968	Animalia	Chordata	Amphibia	Anura	Bufonidae	Anaxyrus	Anaxyrus americanus
784	15T 609855.17mE 4649874.86mN	15T	609855	4.64987e+06	98665701	2021-08-21	2021-08-21 22:31:00 UTC	emilylarosa	research	41.9932	-91.6737	Anaxyrus americanus	American Toad	64968	Animalia	Chordata	Amphibia	Anura	Bufonidae	Anaxyrus	Anaxyrus americanus
398	15T 610533.85mE 4649606.39mN	15T	610534	4.64961e+06	85018843	2021-06-29	2021-06-29 20:10:25 UTC	dannyhughes	research	41.9907	-91.6655	Lithobates catesbeianus	American Bullfrog	65979	Animalia	Chordata	Amphibia	Anura	Ranidae	Lithobates	Lithobates catesbeianus
613	15T 610544.04mE 4649630.96mN	15T	610544	4.64963e+06	94485129	2021-09-11	2021-09-11 15:12:47 UTC	shion2	research	41.9909	-91.6654	Lithobates catesbeianus	American Bullfrog	65979	Animalia	Chordata	Amphibia	Anura	Ranidae	Lithobates	Lithobates catesbeianus
478	15T 610541.42mE 4649622.82mN	15T	610541	4.64962e+06	87735614	2021-07-19	2021-07-19 14:55:27 UTC	dannyhughes	research	41.9909	-91.6654	Lithobates clamitans	Green Frog	65982	Animalia	Chordata	Amphibia	Anura	Ranidae	Lithobates	Lithobates clamitans
180	15T 609905.36mE 4649797.89mN	15T	609905	4.6498e+06	78626501	2021-05-13	2021-05-13 16:15:25 UTC	laurvelez	research	41.9925	-91.6731	Lithobates pipiens	Northern Leopard Frog	66003	Animalia	Chordata	Amphibia	Anura	Ranidae	Lithobates	Lithobates pipiens
345	15T 610371.72mE 4649975.62mN	15T	610372	4.64998e+06	84628560	2021-06-26	2021-06-26 22:49:58 UTC	dannyhughes	research	41.9941	-91.6674	Popillia japonica	Japanese Beetle	67760	Animalia	Arthropoda	Insecta	Coleoptera	Scarabaeidae	Popillia	Popillia japonica
384	15T 610295.18mE 4650045.56mN	15T	610295	4.65005e+06	84634545	2021-06-26	2021-06-26 19:17:20 UTC	dannyhughes	research	41.9947	-91.6683	Popillia japonica	Japanese Beetle	67760	Animalia	Arthropoda	Insecta	Coleoptera	Scarabaeidae	Popillia	Popillia japonica
599	15T 610367.21mE 4649982.44mN	15T	610367	4.64998e+06	92837820	2021-08-28	2021-08-28 17:23:10 UTC	dannyhughes	research	41.9941	-91.6675	Tenodera sinensis	Chinese Mantis	71034	Animalia	Arthropoda	Insecta	Mantodea	Mantidae	Tenodera	Tenodera sinensis
690	15T 610373.59mE 4649964.74mN	15T	610374	4.64996e+06	96159333	2021-09-25	2021-09-25 21:55:34 UTC	dannyhughes	research	41.994	-91.6674	Tenodera sinensis	Chinese Mantis	71034	Animalia	Arthropoda	Insecta	Mantodea	Mantidae	Tenodera	Tenodera sinensis
449	15T 610515.20mE 4649632.71mN	15T	610515	4.64963e+06	86509018	2021-07-10	2021-07-10 21:40:05 UTC	jaclynadams	research	41.991	-91.6658	Daucus carota	Queen Anne's lace	76610	Plantae	Tracheophyta	Magnoliopsida	Apiales	Apiaceae	Daucus	Daucus carota
781	15T 609805.31mE 4650114.65mN	15T	609805	4.65011e+06	98665696	2021-08-21	2021-08-21 22:19:00 UTC	emilylarosa	research	41.9954	-91.6742	Helenium autumnale	common sneezeweed	77349	Plantae	Tracheophyta	Magnoliopsida	Asterales	Asteraceae	Helenium	Helenium autumnale
511	15T 610160.77mE 4649862.71mN	15T	610161	4.64986e+06	88901886	2021-07-24	2021-07-24 19:07:00 UTC	myranda_hadley	research	41.9931	-91.67	Verbena bracteata	Bigbract Verbena	79488	Plantae	Tracheophyta	Magnoliopsida	Lamiales	Verbenaceae	Verbena	Verbena bracteata
761	15T 610385.13mE 4650059.30mN	15T	610385	4.65006e+06	98436584	2021-10-16	2021-10-16 19:10:03 UTC	dannyhughes	research	41.9948	-91.6673	Lumbricus terrestris	Common Earthworm	81545	Animalia	Annelida	Clitellata	Haplotaxida	Lumbricidae	Lumbricus	Lumbricus terrestris
399	15T 610525.80mE 4649655.29mN	15T	610526	4.64966e+06	85039833	2021-06-29	2021-06-29 14:52:56 UTC	laurvelez	research	41.9912	-91.6656	Ictalurus punctatus	Channel Catfish	81554	Animalia	Chordata	Actinopterygii	Siluriformes	Ictaluridae	Ictalurus	Ictalurus punctatus
614	15T 610543.92mE 4649630.71mN	15T	610544	4.64963e+06	94487114	2021-09-11	2021-09-11 15:16:54 UTC	shion2	research	41.9909	-91.6654	Epargyreus clarus	Silver-spotted Skipper	81559	Animalia	Arthropoda	Insecta	Lepidoptera	Hesperiidae	Epargyreus	Epargyreus clarus
486	15T 610530.96mE 4649595.93mN	15T	610531	4.6496e+06	88034821	2021-07-21	2021-07-21 18:15:09 UTC	dannyhughes	research	41.9906	-91.6656	Belostoma flumineum		81575	Animalia	Arthropoda	Insecta	Hemiptera	Belostomatidae	Belostoma	Belostoma flumineum
571	15T 610369.73mE 4650015.37mN	15T	610370	4.65002e+06	92831817	2021-08-28	2021-08-28 20:00:17 UTC	dannyhughes	research	41.9944	-91.6674	Platycryptus undatus	Tan Jumping Spider	81839	Animalia	Arthropoda	Arachnida	Araneae	Salticidae	Platycryptus	Platycryptus undatus
591	15T 610365.47mE 4650007.72mN	15T	610365	4.65001e+06	92835377	2021-08-28	2021-08-28 18:10:20 UTC	dannyhughes	research	41.9944	-91.6675	Platycryptus undatus	Tan Jumping Spider	81839	Animalia	Arthropoda	Arachnida	Araneae	Salticidae	Platycryptus	Platycryptus undatus
696	15T 610358.27mE 4649983.12mN	15T	610358	4.64998e+06	96160689	2021-09-25	2021-09-25 20:58:13 UTC	dannyhughes	research	41.9941	-91.6676	Halyomorpha halys	Brown Marmorated Stink Bug	81923	Animalia	Arthropoda	Insecta	Hemiptera	Pentatomidae	Halyomorpha	Halyomorpha halys
694	15T 610325.12mE 4650028.22mN	15T	610325	4.65003e+06	96160204	2021-09-25	2021-09-25 21:09:11 UTC	dannyhughes	research	41.9945	-91.668	Syritta pipiens	Common Compost Fly	81979	Animalia	Arthropoda	Insecta	Diptera	Syrphidae	Syritta	Syritta pipiens
397	15T 610521.04mE 4649579.62mN	15T	610521	4.64958e+06	85018769	2021-06-29	2021-06-29 20:13:52 UTC	dannyhughes	research	41.9905	-91.6657	Ameiurus melas	Black Bullhead	82278	Animalia	Chordata	Actinopterygii	Siluriformes	Ictaluridae	Ameiurus	Ameiurus melas
420	15T 609925.25mE 4650105.03mN	15T	609925	4.65011e+06	86486137	2021-07-10	2021-07-10 20:48:42 UTC	dannyhughes	research	41.9953	-91.6728	Celastrina neglecta	Summer Azure	82792	Animalia	Arthropoda	Insecta	Lepidoptera	Lycaenidae	Celastrina	Celastrina neglecta
439	15T 609868.77mE 4650146.10mN	15T	609869	4.65015e+06	86505848	2021-07-10	2021-07-10 17:22:35 UTC	jaclynadams	research	41.9957	-91.6735	Celastrina neglecta	Summer Azure	82792	Animalia	Arthropoda	Insecta	Lepidoptera	Lycaenidae	Celastrina	Celastrina neglecta
331	15T 610314.27mE 4650039.38mN	15T	610314	4.65004e+06	84596646	2021-06-26	2021-06-26 14:16:42 UTC	lyssieahern	research	41.9946	-91.6681	Chauliognathus marginatus	Margined Leatherwing Beetle	84040	Animalia	Arthropoda	Insecta	Coleoptera	Cantharidae	Chauliognathus	Chauliognathus marginatus
380	15T 610385.52mE 4649972.57mN	15T	610386	4.64997e+06	84633919	2021-06-26	2021-06-26 19:24:14 UTC	dannyhughes	research	41.994	-91.6673	Chauliognathus marginatus	Margined Leatherwing Beetle	84040	Animalia	Arthropoda	Insecta	Coleoptera	Cantharidae	Chauliognathus	Chauliognathus marginatus
383	15T 610314.85mE 4650037.02mN	15T	610315	4.65004e+06	84634406	2021-06-26	2021-06-26 19:17:55 UTC	dannyhughes	research	41.9946	-91.6681	Chauliognathus marginatus	Margined Leatherwing Beetle	84040	Animalia	Arthropoda	Insecta	Coleoptera	Cantharidae	Chauliognathus	Chauliognathus marginatus
391	15T 610322.33mE 4650040.97mN	15T	610322	4.65004e+06	84769408	2021-06-26	2021-06-26 14:15:29 UTC	laurvelez	research	41.9947	-91.668	Chauliognathus marginatus	Margined Leatherwing Beetle	84040	Animalia	Arthropoda	Insecta	Coleoptera	Cantharidae	Chauliognathus	Chauliognathus marginatus
343	15T 610347.03mE 4650030.06mN	15T	610347	4.65003e+06	84604672	2021-06-26	2021-06-26 15:35:33 UTC	lyssieahern	research	41.9946	-91.6677	Chrysochus auratus	Dogbane Leaf Beetle	84162	Animalia	Arthropoda	Insecta	Coleoptera	Chrysomelidae	Chrysochus	Chrysochus auratus
381	15T 610367.56mE 4649965.40mN	15T	610368	4.64997e+06	84634218	2021-06-26	2021-06-26 19:21:46 UTC	dannyhughes	research	41.994	-91.6675	Chrysochus auratus	Dogbane Leaf Beetle	84162	Animalia	Arthropoda	Insecta	Coleoptera	Chrysomelidae	Chrysochus	Chrysochus auratus
442	15T 609948.24mE 4650142.24mN	15T	609948	4.65014e+06	86506760	2021-07-10	2021-07-10 21:50:09 UTC	jaclynadams	research	41.9956	-91.6725	Chrysochus auratus	Dogbane Leaf Beetle	84162	Animalia	Arthropoda	Insecta	Coleoptera	Chrysomelidae	Chrysochus	Chrysochus auratus
430	15T 610339.90mE 4650004.01mN	15T	610340	4.65e+06	86502400	2021-07-10	2021-07-10 19:34:35 UTC	dannyhughes	research	41.9943	-91.6678	Lygus lineolaris	North American Tarnished Plant Bug	84507	Animalia	Arthropoda	Insecta	Hemiptera	Miridae	Lygus	Lygus lineolaris
475	15T 610540.54mE 4649598.73mN	15T	610541	4.6496e+06	87460920	2021-07-15	2021-07-15 19:00:31 UTC	dannyhughes	research	41.9906	-91.6655	Plathemis lydia	Common Whitetail	84549	Animalia	Arthropoda	Insecta	Odonata	Libellulidae	Plathemis	Plathemis lydia
523	15T 609772.64mE 4650113.51mN	15T	609773	4.65011e+06	92041360	2021-08-21	2021-08-21 22:23:18 UTC	dannyhughes	research	41.9954	-91.6746	Plathemis lydia	Common Whitetail	84549	Animalia	Arthropoda	Insecta	Odonata	Libellulidae	Plathemis	Plathemis lydia
782	15T 609773.83mE 4650094.79mN	15T	609774	4.65009e+06	98665697	2021-08-21	2021-08-21 22:22:00 UTC	emilylarosa	research	41.9952	-91.6746	Plathemis lydia	Common Whitetail	84549	Animalia	Arthropoda	Insecta	Odonata	Libellulidae	Plathemis	Plathemis lydia
580	15T 609805.22mE 4650054.16mN	15T	609805	4.65005e+06	92832930	2021-08-28	2021-08-28 19:38:21 UTC	dannyhughes	research	41.9948	-91.6743	Polistes dominula	European Paper Wasp	84640	Animalia	Arthropoda	Insecta	Hymenoptera	Vespidae	Polistes	Polistes dominula
628	15T 610487.61mE 4649574.20mN	15T	610488	4.64957e+06	94530632	2021-09-11	2021-09-11 20:19:37 UTC	dannyhughes	research	41.9904	-91.6661	Polistes dominula	European Paper Wasp	84640	Animalia	Arthropoda	Insecta	Hymenoptera	Vespidae	Polistes	Polistes dominula
532	15T 609784.09mE 4650123.69mN	15T	609784	4.65012e+06	92043057	2021-08-21	2021-08-21 22:03:35 UTC	dannyhughes	research	41.9955	-91.6745	Ischnura verticalis	Eastern Forktail	84722	Animalia	Arthropoda	Insecta	Odonata	Coenagrionidae	Ischnura	Ischnura verticalis
342	15T 610496.74mE 4649390.66mN	15T	610497	4.64939e+06	84602766	2021-06-26	2021-06-26 15:23:09 UTC	jane_nesmith	research	41.9888	-91.666	Monarda fistulosa	wild bergamot	85320	Plantae	Tracheophyta	Magnoliopsida	Lamiales	Lamiaceae	Monarda	Monarda fistulosa
406	15T 610503.73mE 4649789.42mN	15T	610504	4.64979e+06	86236885	2021-07-08	2021-07-08 21:10:21 UTC	nikki116	research	41.9924	-91.6659	Monarda fistulosa	wild bergamot	85320	Plantae	Tracheophyta	Magnoliopsida	Lamiales	Lamiaceae	Monarda	Monarda fistulosa
447	15T 610490.24mE 4649812.24mN	15T	610490	4.64981e+06	86508442	2021-07-10	2021-07-10 21:42:56 UTC	jaclynadams	research	41.9926	-91.666	Ratibida pinnata	grey-headed coneflower	85331	Plantae	Tracheophyta	Magnoliopsida	Asterales	Asteraceae	Ratibida	Ratibida pinnata
505	15T 610160.77mE 4649862.71mN	15T	610161	4.64986e+06	88899591	2021-07-24	2021-07-24 19:53:04 UTC	myranda_hadley	research	41.9931	-91.67	Ratibida pinnata	grey-headed coneflower	85331	Plantae	Tracheophyta	Magnoliopsida	Asterales	Asteraceae	Ratibida	Ratibida pinnata
562	15T 609960.24mE 4650158.56mN	15T	609960	4.65016e+06	92049229	2021-08-21	2021-08-21 21:54:05 UTC	dannyhughes	research	41.9958	-91.6724	Sphex ichneumoneus	Great Golden Digger Wasp	85362	Animalia	Arthropoda	Insecta	Hymenoptera	Sphecidae	Sphex	Sphex ichneumoneus
564	15T 609984.08mE 4650119.24mN	15T	609984	4.65012e+06	92408892	2021-08-21	2021-08-21 21:49:57 UTC	sangai	research	41.9954	-91.6721	Sphex ichneumoneus	Great Golden Digger Wasp	85362	Animalia	Arthropoda	Insecta	Hymenoptera	Sphecidae	Sphex	Sphex ichneumoneus
719	15T 610108.94mE 4650092.89mN	15T	610109	4.65009e+06	97482151	2021-08-21	2021-08-21 21:50:00 UTC	emilylarosa	research	41.9952	-91.6706	Sphex ichneumoneus	Great Golden Digger Wasp	85362	Animalia	Arthropoda	Insecta	Hymenoptera	Sphecidae	Sphex	Sphex ichneumoneus
289	15T 610385.97mE 4649943.37mN	15T	610386	4.64994e+06	82731480	2021-06-12	2021-06-12 14:17:34 UTC	lyssieahern	research	41.9938	-91.6673	Arigomphus submedianus	Jade Clubtail	94624	Animalia	Arthropoda	Insecta	Odonata	Gomphidae	Arigomphus	Arigomphus submedianus
664	15T 609901.33mE 4650039.91mN	15T	609901	4.65004e+06	96131514	2021-09-25	2021-09-25 15:02:54 UTC	bianca361	research	41.9947	-91.6731	Dorosoma cepedianum	American Gizzard Shad	99544	Animalia	Chordata	Actinopterygii	Clupeiformes	Clupeidae	Dorosoma	Dorosoma cepedianum
725	15T 609802.15mE 4650102.11mN	15T	609802	4.6501e+06	97482173	2021-08-21	2021-08-21 22:18:00 UTC	emilylarosa	research	41.9953	-91.6743	Enallagma civile	Familiar Bluet	99897	Animalia	Arthropoda	Insecta	Odonata	Coenagrionidae	Enallagma	Enallagma civile
290	15T 610218.56mE 4650060.56mN	15T	610219	4.65006e+06	82731835	2021-06-12	2021-06-12 19:00:35 UTC	dannyhughes	research	41.9948	-91.6693	Epitheca princeps	Prince Baskettail	100215	Animalia	Arthropoda	Insecta	Odonata	Corduliidae	Epitheca	Epitheca princeps
730	15T 609796.23mE 4650113.13mN	15T	609796	4.65011e+06	98145325	2021-10-12	2021-10-13 01:26:20 UTC	dannyhughes	research	41.9954	-91.6743	Labidesthes sicculus	Brook Silverside	103870	Animalia	Chordata	Actinopterygii	Atheriniformes	Atherinopsidae	Labidesthes	Labidesthes sicculus
240	15T 609824.92mE 4650062.24mN	15T	609825	4.65006e+06	80815495	2021-05-29	2021-05-29 21:02:48 UTC	dannyhughes	research	41.9949	-91.674	Morone mississippiensis	Yellow Bass	106196	Animalia	Chordata	Actinopterygii	Perciformes	Moronidae	Morone	Morone mississippiensis
341	15T 610530.70mE 4649610.69mN	15T	610531	4.64961e+06	84602278	2021-06-26	2021-06-26 15:19:29 UTC	jane_nesmith	research	41.9908	-91.6656	Morone mississippiensis	Yellow Bass	106196	Animalia	Chordata	Actinopterygii	Perciformes	Moronidae	Morone	Morone mississippiensis
329	15T 610358.74mE 4650022.98mN	15T	610359	4.65002e+06	84595485	2021-06-26	2021-06-26 14:33:12 UTC	katdwoman	research	41.9945	-91.6676	Atteva aurea	Ailanthus Webworm Moth	116681	Animalia	Arthropoda	Insecta	Lepidoptera	Attevidae	Atteva	Atteva aurea
339	15T 610346.94mE 4650029.26mN	15T	610347	4.65003e+06	84598097	2021-06-26	2021-06-26 14:49:43 UTC	lyssieahern	research	41.9945	-91.6677	Atteva aurea	Ailanthus Webworm Moth	116681	Animalia	Arthropoda	Insecta	Lepidoptera	Attevidae	Atteva	Atteva aurea
604	15T 610398.82mE 4649992.41mN	15T	610399	4.64999e+06	92839949	2021-08-28	2021-08-28 17:29:24 UTC	dannyhughes	research	41.9942	-91.6671	Atteva aurea	Ailanthus Webworm Moth	116681	Animalia	Arthropoda	Insecta	Lepidoptera	Attevidae	Atteva	Atteva aurea
689	15T 610387.48mE 4649936.60mN	15T	610387	4.64994e+06	96159029	2021-09-25	2021-09-25 22:22:03 UTC	dannyhughes	research	41.9937	-91.6672	Atteva aurea	Ailanthus Webworm Moth	116681	Animalia	Arthropoda	Insecta	Lepidoptera	Attevidae	Atteva	Atteva aurea
506	15T 610501.95mE 4649557.89mN	15T	610502	4.64956e+06	88900299	2021-07-24	2021-07-24 19:52:25 UTC	myranda_hadley	research	41.9903	-91.6659	Rudbeckia laciniata	cutleaf coneflower	116735	Plantae	Tracheophyta	Magnoliopsida	Asterales	Asteraceae	Rudbeckia	Rudbeckia laciniata
192	15T 610563.25mE 4649781.81mN	15T	610563	4.64978e+06	78872763	2021-05-15	2021-05-15 18:26:30 UTC	dannyhughes	research	41.9923	-91.6652	Pandion haliaetus	Osprey	116999	Animalia	Chordata	Aves	Accipitriformes	Pandionidae	Pandion	Pandion haliaetus
202	15T 609922.11mE 4649990.47mN	15T	609922	4.64999e+06	78905907	2021-05-15	2021-05-15 12:13:00 UTC	robbie16	research	41.9943	-91.6729	Pandion haliaetus	Osprey	116999	Animalia	Chordata	Aves	Accipitriformes	Pandionidae	Pandion	Pandion haliaetus
674	15T 610516.97mE 4649595.93mN	15T	610517	4.6496e+06	96137428	2021-09-25	2021-09-25 14:39:49 UTC	teparenteau21	research	41.9906	-91.6657	Symphyotrichum novae-angliae	New England aster	117443	Plantae	Tracheophyta	Magnoliopsida	Asterales	Asteraceae	Symphyotrichum	Symphyotrichum novae-angliae
518	15T 610280.44mE 4649450.37mN	15T	610280	4.64945e+06	92040607	2021-08-21	2021-08-21 22:54:48 UTC	dannyhughes	research	41.9893	-91.6686	Haematopis grataria	Chickweed Geometer Moth	118490	Animalia	Arthropoda	Insecta	Lepidoptera	Geometridae	Haematopis	Haematopis grataria
573	15T 609811.82mE 4650136.28mN	15T	609812	4.65014e+06	92832093	2021-08-28	2021-08-28 19:50:44 UTC	dannyhughes	research	41.9956	-91.6742	Helicoverpa zea	Corn Earworm Moth	118492	Animalia	Arthropoda	Insecta	Lepidoptera	Noctuidae	Helicoverpa	Helicoverpa zea
286	15T 610315.20mE 4650032.66mN	15T	610315	4.65003e+06	82730264	2021-06-12	2021-06-12 18:49:15 UTC	dannyhughes	research	41.9946	-91.6681	Tetraopes tetrophthalmus	Red Milkweed Beetle	118559	Animalia	Arthropoda	Insecta	Coleoptera	Cerambycidae	Tetraopes	Tetraopes tetrophthalmus
332	15T 610313.15mE 4650038.57mN	15T	610313	4.65004e+06	84596729	2021-06-26	2021-06-26 14:20:52 UTC	lyssieahern	research	41.9946	-91.6681	Tetraopes tetrophthalmus	Red Milkweed Beetle	118559	Animalia	Arthropoda	Insecta	Coleoptera	Cerambycidae	Tetraopes	Tetraopes tetrophthalmus
355	15T 609800.29mE 4650024.77mN	15T	609800	4.65002e+06	84630648	2021-06-26	2021-06-26 16:44:23 UTC	lyssieahern	research	41.9946	-91.6743	Tetraopes tetrophthalmus	Red Milkweed Beetle	118559	Animalia	Arthropoda	Insecta	Coleoptera	Cerambycidae	Tetraopes	Tetraopes tetrophthalmus
390	15T 610324.08mE 4650044.96mN	15T	610324	4.65004e+06	84769128	2021-06-26	2021-06-26 14:21:44 UTC	laurvelez	research	41.9947	-91.668	Tetraopes tetrophthalmus	Red Milkweed Beetle	118559	Animalia	Arthropoda	Insecta	Coleoptera	Cerambycidae	Tetraopes	Tetraopes tetrophthalmus
183	15T 609793.32mE 4650054.94mN	15T	609793	4.65005e+06	78742839	2021-05-14	2021-05-14 14:00:16 UTC	laurvelez	research	41.9949	-91.6744	Bombus impatiens	Common Eastern Bumble Bee	118970	Animalia	Arthropoda	Insecta	Hymenoptera	Apidae	Bombus	Bombus impatiens
366	15T 610301.02mE 4650040.18mN	15T	610301	4.65004e+06	84632369	2021-06-26	2021-06-26 21:14:36 UTC	dannyhughes	research	41.9947	-91.6683	Bombus impatiens	Common Eastern Bumble Bee	118970	Animalia	Arthropoda	Insecta	Hymenoptera	Apidae	Bombus	Bombus impatiens
408	15T 610348.47mE 4650019.36mN	15T	610348	4.65002e+06	86452296	2021-07-10	2021-07-10 19:23:09 UTC	art_and_susan_staed	research	41.9945	-91.6677	Bombus impatiens	Common Eastern Bumble Bee	118970	Animalia	Arthropoda	Insecta	Hymenoptera	Apidae	Bombus	Bombus impatiens
413	15T 610174.75mE 4650070.00mN	15T	610175	4650070	86482718	2021-07-10	2021-07-10 21:55:33 UTC	dannyhughes	research	41.9949	-91.6698	Bombus impatiens	Common Eastern Bumble Bee	118970	Animalia	Arthropoda	Insecta	Hymenoptera	Apidae	Bombus	Bombus impatiens
465	15T 609968.37mE 4650111.22mN	15T	609968	4.65011e+06	86515691	2021-07-10	2021-07-10 15:43:06 UTC	lyssieahern	research	41.9953	-91.6723	Bombus impatiens	Common Eastern Bumble Bee	118970	Animalia	Arthropoda	Insecta	Hymenoptera	Apidae	Bombus	Bombus impatiens
559	15T 610336.07mE 4650008.77mN	15T	610336	4.65001e+06	92048925	2021-08-21	2021-08-21 20:07:32 UTC	dannyhughes	research	41.9944	-91.6679	Bombus impatiens	Common Eastern Bumble Bee	118970	Animalia	Arthropoda	Insecta	Hymenoptera	Apidae	Bombus	Bombus impatiens
560	15T 610359.44mE 4649980.12mN	15T	610359	4.64998e+06	92049086	2021-08-21	2021-08-21 19:21:34 UTC	dannyhughes	research	41.9941	-91.6676	Bombus impatiens	Common Eastern Bumble Bee	118970	Animalia	Arthropoda	Insecta	Hymenoptera	Apidae	Bombus	Bombus impatiens
577	15T 609828.07mE 4649983.08mN	15T	609828	4.64998e+06	92832377	2021-08-28	2021-08-28 19:40:03 UTC	dannyhughes	research	41.9942	-91.674	Bombus impatiens	Common Eastern Bumble Bee	118970	Animalia	Arthropoda	Insecta	Hymenoptera	Apidae	Bombus	Bombus impatiens
581	15T 610044.44mE 4649544.53mN	15T	610044	4.64954e+06	92833428	2021-08-28	2021-08-28 19:37:28 UTC	dannyhughes	research	41.9902	-91.6715	Bombus impatiens	Common Eastern Bumble Bee	118970	Animalia	Arthropoda	Insecta	Hymenoptera	Apidae	Bombus	Bombus impatiens
633	15T 610375.49mE 4649969.79mN	15T	610375	4.64997e+06	94531022	2021-09-11	2021-09-11 20:15:59 UTC	dannyhughes	research	41.994	-91.6674	Bombus impatiens	Common Eastern Bumble Bee	118970	Animalia	Arthropoda	Insecta	Hymenoptera	Apidae	Bombus	Bombus impatiens
649	15T 610556.39mE 4649715.30mN	15T	610556	4.64972e+06	94532684	2021-09-11	2021-09-11 21:20:54 UTC	jaclynadams	research	41.9917	-91.6652	Bombus impatiens	Common Eastern Bumble Bee	118970	Animalia	Arthropoda	Insecta	Hymenoptera	Apidae	Bombus	Bombus impatiens
651	15T 610378.55mE 4649948.45mN	15T	610379	4.64995e+06	94532798	2021-09-11	2021-09-11 18:11:05 UTC	dannyhughes	research	41.9938	-91.6674	Bombus impatiens	Common Eastern Bumble Bee	118970	Animalia	Arthropoda	Insecta	Hymenoptera	Apidae	Bombus	Bombus impatiens
678	15T 610294.52mE 4650058.02mN	15T	610295	4.65006e+06	96138281	2021-09-25	2021-09-25 14:25:32 UTC	laurvelez	research	41.9948	-91.6683	Bombus impatiens	Common Eastern Bumble Bee	118970	Animalia	Arthropoda	Insecta	Hymenoptera	Apidae	Bombus	Bombus impatiens
686	15T 610207.29mE 4650072.73mN	15T	610207	4.65007e+06	96157698	2021-09-25	2021-09-25 15:01:24 UTC	kiilycook	research	41.995	-91.6694	Bombus impatiens	Common Eastern Bumble Bee	118970	Animalia	Arthropoda	Insecta	Hymenoptera	Apidae	Bombus	Bombus impatiens
701	15T 610329.58mE 4650022.38mN	15T	610330	4.65002e+06	96161539	2021-09-25	2021-09-25 19:56:08 UTC	dannyhughes	research	41.9945	-91.6679	Bombus impatiens	Common Eastern Bumble Bee	118970	Animalia	Arthropoda	Insecta	Hymenoptera	Apidae	Bombus	Bombus impatiens
708	15T 610332.50mE 4650022.51mN	15T	610332	4.65002e+06	96182532	2021-09-25	2021-09-25 19:26:01 UTC	jaclynadams	research	41.9945	-91.6679	Bombus impatiens	Common Eastern Bumble Bee	118970	Animalia	Arthropoda	Insecta	Hymenoptera	Apidae	Bombus	Bombus impatiens
775	15T 610299.88mE 4650070.47mN	15T	610300	4.65007e+06	98580483	2021-10-16	2021-10-16 19:36:16 UTC	sangai	research	41.9949	-91.6683	Bombus impatiens	Common Eastern Bumble Bee	118970	Animalia	Arthropoda	Insecta	Hymenoptera	Apidae	Bombus	Bombus impatiens
744	15T 609962.04mE 4650141.82mN	15T	609962	4.65014e+06	98409894	2021-10-16	2021-10-16 14:16:25 UTC	lexikrestel	research	41.9956	-91.6723	Ageratina altissima	white snakeroot	119048	Plantae	Tracheophyta	Magnoliopsida	Asterales	Asteraceae	Ageratina	Ageratina altissima
477	15T 610514.16mE 4649570.74mN	15T	610514	4.64957e+06	87621603	2021-07-18	2021-07-18 18:43:13 UTC	dannyhughes	research	41.9904	-91.6658	Ranatra		119346	Animalia	Arthropoda	Insecta	Hemiptera	Nepidae	Ranatra
440	15T 609935.51mE 4650167.78mN	15T	609936	4.65017e+06	86506368	2021-07-10	2021-07-10 22:19:46 UTC	jaclynadams	research	41.9959	-91.6727	Cisseps fulvicollis	Yellow-collared Scape Moth	119789	Animalia	Arthropoda	Insecta	Lepidoptera	Erebidae	Cisseps	Cisseps fulvicollis
231	15T 610336.61mE 4650013.78mN	15T	610337	4.65001e+06	80768247	2021-05-29	2021-05-29 13:30:06 UTC	laurvelez	research	41.9944	-91.6678	Bombus griseocollis	Brown-belted Bumble Bee	120215	Animalia	Arthropoda	Insecta	Hymenoptera	Apidae	Bombus	Bombus griseocollis
330	15T 610313.96mE 4650044.11mN	15T	610314	4.65004e+06	84596537	2021-06-26	2021-06-26 14:15:33 UTC	lyssieahern	research	41.9947	-91.6681	Bombus griseocollis	Brown-belted Bumble Bee	120215	Animalia	Arthropoda	Insecta	Hymenoptera	Apidae	Bombus	Bombus griseocollis
334	15T 610315.43mE 4650035.91mN	15T	610315	4.65004e+06	84597046	2021-06-26	2021-06-26 14:20:58 UTC	lyssieahern	research	41.9946	-91.6681	Bombus griseocollis	Brown-belted Bumble Bee	120215	Animalia	Arthropoda	Insecta	Hymenoptera	Apidae	Bombus	Bombus griseocollis
382	15T 610275.58mE 4650044.04mN	15T	610276	4.65004e+06	84634335	2021-06-26	2021-06-26 19:18:59 UTC	dannyhughes	research	41.9947	-91.6686	Bombus griseocollis	Brown-belted Bumble Bee	120215	Animalia	Arthropoda	Insecta	Hymenoptera	Apidae	Bombus	Bombus griseocollis
421	15T 609906.79mE 4650090.98mN	15T	609907	4.65009e+06	86486304	2021-07-10	2021-07-10 20:45:06 UTC	dannyhughes	research	41.9952	-91.673	Bombus griseocollis	Brown-belted Bumble Bee	120215	Animalia	Arthropoda	Insecta	Hymenoptera	Apidae	Bombus	Bombus griseocollis
535	15T 609878.80mE 4650147.76mN	15T	609879	4.65015e+06	92043556	2021-08-21	2021-08-21 21:57:28 UTC	dannyhughes	research	41.9957	-91.6733	Bombus griseocollis	Brown-belted Bumble Bee	120215	Animalia	Arthropoda	Insecta	Hymenoptera	Apidae	Bombus	Bombus griseocollis
565	15T 609858.08mE 4650127.16mN	15T	609858	4.65013e+06	92408968	2021-08-21	2021-08-21 21:57:53 UTC	sangai	research	41.9955	-91.6736	Bombus griseocollis	Brown-belted Bumble Bee	120215	Animalia	Arthropoda	Insecta	Hymenoptera	Apidae	Bombus	Bombus griseocollis
401	15T 610537.71mE 4649609.90mN	15T	610538	4.64961e+06	85160755	2021-06-30	2021-06-30 13:42:27 UTC	laurvelez	research	41.9907	-91.6655	Dolomedes triton	Six-spotted Fishing Spider	121437	Animalia	Arthropoda	Arachnida	Araneae	Pisauridae	Dolomedes	Dolomedes triton
402	15T 610547.17mE 4649634.58mN	15T	610547	4.64963e+06	85160811	2021-06-30	2021-06-30 13:42:12 UTC	laurvelez	research	41.991	-91.6654	Dolomedes triton	Six-spotted Fishing Spider	121437	Animalia	Arthropoda	Arachnida	Araneae	Pisauridae	Dolomedes	Dolomedes triton
296	15T 610384.48mE 4649955.42mN	15T	610384	4.64996e+06	82733085	2021-06-12	2021-06-12 19:10:51 UTC	dannyhughes	research	41.9939	-91.6673	Sceliphron caementarium	Yellow-legged Mud-dauber Wasp	121821	Animalia	Arthropoda	Insecta	Hymenoptera	Sphecidae	Sceliphron	Sceliphron caementarium
300	15T 610388.72mE 4649911.97mN	15T	610389	4.64991e+06	82758712	2021-06-12	2021-06-12 20:07:33 UTC	dannyhughes	research	41.9935	-91.6672	Sceliphron caementarium	Yellow-legged Mud-dauber Wasp	121821	Animalia	Arthropoda	Insecta	Hymenoptera	Sphecidae	Sceliphron	Sceliphron caementarium
548	15T 610315.44mE 4650033.89mN	15T	610315	4.65003e+06	92046946	2021-08-21	2021-08-21 19:43:34 UTC	dannyhughes	research	41.9946	-91.6681	Sceliphron caementarium	Yellow-legged Mud-dauber Wasp	121821	Animalia	Arthropoda	Insecta	Hymenoptera	Sphecidae	Sceliphron	Sceliphron caementarium
601	15T 610379.70mE 4649975.52mN	15T	610380	4.64998e+06	92838427	2021-08-28	2021-08-28 17:17:21 UTC	dannyhughes	research	41.9941	-91.6673	Sceliphron caementarium	Yellow-legged Mud-dauber Wasp	121821	Animalia	Arthropoda	Insecta	Hymenoptera	Sphecidae	Sceliphron	Sceliphron caementarium
609	15T 610368.75mE 4650014.32mN	15T	610369	4.65001e+06	92841134	2021-08-28	2021-08-28 18:09:55 UTC	dannyhughes	research	41.9944	-91.6675	Sceliphron caementarium	Yellow-legged Mud-dauber Wasp	121821	Animalia	Arthropoda	Insecta	Hymenoptera	Sphecidae	Sceliphron	Sceliphron caementarium
717	15T 610350.63mE 4649988.49mN	15T	610351	4.64999e+06	97482145	2021-08-21	2021-08-21 21:40:00 UTC	emilylarosa	research	41.9942	-91.6677	Sceliphron caementarium	Yellow-legged Mud-dauber Wasp	121821	Animalia	Arthropoda	Insecta	Hymenoptera	Sphecidae	Sceliphron	Sceliphron caementarium
468	15T 609871.55mE 4649836.71mN	15T	609872	4.64984e+06	86515825	2021-07-10	2021-07-10 16:09:55 UTC	lyssieahern	research	41.9929	-91.6735	Gryllus pennsylvanicus	Fall Field Cricket	122193	Animalia	Arthropoda	Insecta	Orthoptera	Gryllidae	Gryllus	Gryllus pennsylvanicus
504	15T 610160.77mE 4649862.71mN	15T	610161	4.64986e+06	88899275	2021-07-24	2021-07-24 19:03:51 UTC	myranda_hadley	research	41.9931	-91.67	Asclepias incarnata	swamp milkweed	125381	Plantae	Tracheophyta	Magnoliopsida	Gentianales	Apocynaceae	Asclepias	Asclepias incarnata
471	15T 610379.85mE 4649941.77mN	15T	610380	4.64994e+06	86516082	2021-07-10	2021-07-10 17:02:46 UTC	lyssieahern	research	41.9938	-91.6673	Dissosteira carolina	Carolina Grasshopper	126206	Animalia	Arthropoda	Insecta	Orthoptera	Acrididae	Dissosteira	Dissosteira carolina
499	15T 610275.68mE 4649744.67mN	15T	610276	4.64974e+06	88593343	2021-07-24	2021-07-24 18:43:11 UTC	grant179	research	41.992	-91.6686	Dissosteira carolina	Carolina Grasshopper	126206	Animalia	Arthropoda	Insecta	Orthoptera	Acrididae	Dissosteira	Dissosteira carolina
550	15T 610303.64mE 4650043.29mN	15T	610304	4.65004e+06	92047758	2021-08-21	2021-08-21 19:52:46 UTC	dannyhughes	research	41.9947	-91.6682	Dissosteira carolina	Carolina Grasshopper	126206	Animalia	Arthropoda	Insecta	Orthoptera	Acrididae	Dissosteira	Dissosteira carolina
631	15T 610386.31mE 4649925.66mN	15T	610386	4.64993e+06	94530738	2021-09-11	2021-09-11 19:07:25 UTC	dannyhughes	research	41.9936	-91.6673	Dissosteira carolina	Carolina Grasshopper	126206	Animalia	Arthropoda	Insecta	Orthoptera	Acrididae	Dissosteira	Dissosteira carolina
683	15T 610315.98mE 4650042.81mN	15T	610316	4.65004e+06	96142136	2021-09-25	2021-09-25 15:40:00 UTC	joely98	research	41.9947	-91.6681	Dissosteira carolina	Carolina Grasshopper	126206	Animalia	Arthropoda	Insecta	Orthoptera	Acrididae	Dissosteira	Dissosteira carolina
419	15T 610047.46mE 4650071.24mN	15T	610047	4.65007e+06	86484716	2021-07-10	2021-07-10 20:54:35 UTC	dannyhughes	research	41.995	-91.6713	Coleomegilla maculata	Spotted Pink Ladybeetle	126267	Animalia	Arthropoda	Insecta	Coleoptera	Coccinellidae	Coleomegilla	Coleomegilla maculata
457	15T 610357.78mE 4649984.74mN	15T	610358	4.64998e+06	86515028	2021-07-10	2021-07-10 14:24:16 UTC	lyssieahern	research	41.9941	-91.6676	Toxomerus marginatus	Margined Calligrapher	126889	Animalia	Arthropoda	Insecta	Diptera	Syrphidae	Toxomerus	Toxomerus marginatus
243	15T 609866.50mE 4649869.02mN	15T	609866	4.64987e+06	80816330	2021-05-29	2021-05-29 13:22:21 UTC	lyssieahern	research	41.9932	-91.6735	Securigera varia	purple crownvetch	127186	Plantae	Tracheophyta	Magnoliopsida	Fabales	Fabaceae	Securigera	Securigera varia
257	15T 610301.58mE 4650063.03mN	15T	610302	4.65006e+06	81437954	2021-06-03	2021-06-03 15:10:57 UTC	lrachela	research	41.9949	-91.6683	Securigera varia	purple crownvetch	127186	Plantae	Tracheophyta	Magnoliopsida	Fabales	Fabaceae	Securigera	Securigera varia
261	15T 609875.84mE 4649845.10mN	15T	609876	4.64985e+06	81771760	2021-06-05	2021-06-05 13:48:48 UTC	lyssieahern	research	41.993	-91.6734	Securigera varia	purple crownvetch	127186	Plantae	Tracheophyta	Magnoliopsida	Fabales	Fabaceae	Securigera	Securigera varia
278	15T 609785.42mE 4650086.47mN	15T	609785	4.65009e+06	82725374	2021-06-12	2021-06-12 14:09:02 UTC	farahsuboh	research	41.9951	-91.6745	Securigera varia	purple crownvetch	127186	Plantae	Tracheophyta	Magnoliopsida	Fabales	Fabaceae	Securigera	Securigera varia
281	15T 610237.71mE 4650098.85mN	15T	610238	4.6501e+06	82726808	2021-06-12	2021-06-12 14:02:13 UTC	laurvelez	research	41.9952	-91.669	Securigera varia	purple crownvetch	127186	Plantae	Tracheophyta	Magnoliopsida	Fabales	Fabaceae	Securigera	Securigera varia
308	15T 610207.23mE 4650076.80mN	15T	610207	4.65008e+06	82760297	2021-06-12	2021-06-12 15:07:01 UTC	lyssieahern	research	41.995	-91.6694	Securigera varia	purple crownvetch	127186	Plantae	Tracheophyta	Magnoliopsida	Fabales	Fabaceae	Securigera	Securigera varia
443	15T 610554.98mE 4649716.94mN	15T	610555	4.64972e+06	86507094	2021-07-10	2021-07-10 21:44:29 UTC	jaclynadams	research	41.9917	-91.6653	Securigera varia	purple crownvetch	127186	Plantae	Tracheophyta	Magnoliopsida	Fabales	Fabaceae	Securigera	Securigera varia
501	15T 610334.32mE 4649641.05mN	15T	610334	4.64964e+06	88843996	2021-07-24	2021-07-24 18:37:37 UTC	grant179	research	41.9911	-91.6679	Securigera varia	purple crownvetch	127186	Plantae	Tracheophyta	Magnoliopsida	Fabales	Fabaceae	Securigera	Securigera varia
658	15T 609851.32mE 4649905.52mN	15T	609851	4.64991e+06	96127696	2021-09-25	2021-09-25 14:38:08 UTC	bianca361	research	41.9935	-91.6737	Securigera varia	purple crownvetch	127186	Plantae	Tracheophyta	Magnoliopsida	Fabales	Fabaceae	Securigera	Securigera varia
661	15T 610046.50mE 4650079.22mN	15T	610046	4.65008e+06	96130343	2021-09-25	2021-09-25 14:54:47 UTC	lexikrestel	research	41.995	-91.6713	Securigera varia	purple crownvetch	127186	Plantae	Tracheophyta	Magnoliopsida	Fabales	Fabaceae	Securigera	Securigera varia
665	15T 609785.44mE 4650068.38mN	15T	609785	4.65007e+06	96131829	2021-09-25	2021-09-25 15:05:42 UTC	faithresnick	research	41.995	-91.6745	Securigera varia	purple crownvetch	127186	Plantae	Tracheophyta	Magnoliopsida	Fabales	Fabaceae	Securigera	Securigera varia
677	15T 610044.18mE 4650075.20mN	15T	610044	4.65008e+06	96138212	2021-09-25	2021-09-25 15:25:14 UTC	gkerns02	research	41.995	-91.6714	Securigera varia	purple crownvetch	127186	Plantae	Tracheophyta	Magnoliopsida	Fabales	Fabaceae	Securigera	Securigera varia
688	15T 610073.07mE 4650082.31mN	15T	610073	4.65008e+06	96158050	2021-09-25	2021-09-25 15:16:12 UTC	kiilycook	research	41.9951	-91.671	Securigera varia	purple crownvetch	127186	Plantae	Tracheophyta	Magnoliopsida	Fabales	Fabaceae	Securigera	Securigera varia
644	15T 610369.47mE 4649976.89mN	15T	610369	4.64998e+06	94532075	2021-09-11	2021-09-11 18:27:50 UTC	dannyhughes	research	41.9941	-91.6675	Lucilia sericata	Common European Greenbottle Fly	128824	Animalia	Arthropoda	Insecta	Diptera	Calliphoridae	Lucilia	Lucilia sericata
555	15T 610340.77mE 4650006.78mN	15T	610341	4.65001e+06	92048311	2021-08-21	2021-08-21 19:16:29 UTC	dannyhughes	research	41.9943	-91.6678	Melanoplus femurrubrum	Red-legged Grasshopper	129094	Animalia	Arthropoda	Insecta	Orthoptera	Acrididae	Melanoplus	Melanoplus femurrubrum
558	15T 610343.52mE 4649997.78mN	15T	610344	4.65e+06	92048592	2021-08-21	2021-08-21 19:28:12 UTC	dannyhughes	research	41.9943	-91.6678	Melanoplus femurrubrum	Red-legged Grasshopper	129094	Animalia	Arthropoda	Insecta	Orthoptera	Acrididae	Melanoplus	Melanoplus femurrubrum
759	15T 610339.88mE 4650009.97mN	15T	610340	4.65001e+06	98434756	2021-10-16	2021-10-16 19:45:47 UTC	dannyhughes	research	41.9944	-91.6678	Camponotus pennsylvanicus	Eastern Black Carpenter Ant	129902	Animalia	Arthropoda	Insecta	Hymenoptera	Formicidae	Camponotus	Camponotus pennsylvanicus
538	15T 610193.61mE 4650094.19mN	15T	610194	4.65009e+06	92043796	2021-08-21	2021-08-21 21:37:27 UTC	samigobeli	research	41.9952	-91.6696	Porcellio spinicornis	Brickwork Woodlouse	130169	Animalia	Arthropoda	Malacostraca	Isopoda	Porcellionidae	Porcellio	Porcellio spinicornis
700	15T 610302.27mE 4650039.87mN	15T	610302	4.65004e+06	96161431	2021-09-25	2021-09-25 20:07:55 UTC	dannyhughes	research	41.9946	-91.6683	Porcellio spinicornis	Brickwork Woodlouse	130169	Animalia	Arthropoda	Malacostraca	Isopoda	Porcellionidae	Porcellio	Porcellio spinicornis
114	15T 609858.30mE 4650061.50mN	15T	609858	4.65006e+06	75067033	2021-04-24	2021-04-24 17:05:22 UTC	samigobeli	research	41.9949	-91.6736	Pyganodon grandis	Giant Floater Mussel	130983	Animalia	Mollusca	Bivalvia	Unionida	Unionidae	Pyganodon	Pyganodon grandis
136	15T 610563.50mE 4649719.78mN	15T	610564	4.64972e+06	75087474	2021-04-24	2021-04-24 18:07:44 UTC	dannyhughes	research	41.9917	-91.6652	Pyganodon grandis	Giant Floater Mussel	130983	Animalia	Mollusca	Bivalvia	Unionida	Unionidae	Pyganodon	Pyganodon grandis
169	15T 610570.30mE 4649735.04mN	15T	610570	4.64974e+06	75481419	2021-04-24	2021-04-24 16:28:17 UTC	dannyhughes	research	41.9919	-91.6651	Pyganodon grandis	Giant Floater Mussel	130983	Animalia	Mollusca	Bivalvia	Unionida	Unionidae	Pyganodon	Pyganodon grandis
182	15T 609962.27mE 4650029.34mN	15T	609962	4.65003e+06	78740702	2021-05-14	2021-05-14 13:37:45 UTC	laurvelez	research	41.9946	-91.6724	Pyganodon grandis	Giant Floater Mussel	130983	Animalia	Mollusca	Bivalvia	Unionida	Unionidae	Pyganodon	Pyganodon grandis
236	15T 610579.28mE 4649747.94mN	15T	610579	4.64975e+06	80805681	2021-05-29	2021-05-29 22:08:32 UTC	dannyhughes	research	41.992	-91.665	Pyganodon grandis	Giant Floater Mussel	130983	Animalia	Mollusca	Bivalvia	Unionida	Unionidae	Pyganodon	Pyganodon grandis
479	15T 610521.43mE 4649573.99mN	15T	610521	4.64957e+06	87889294	2021-07-20	2021-07-20 18:22:34 UTC	dannyhughes	research	41.9904	-91.6657	Pyganodon grandis	Giant Floater Mussel	130983	Animalia	Mollusca	Bivalvia	Unionida	Unionidae	Pyganodon	Pyganodon grandis
480	15T 610519.97mE 4649596.03mN	15T	610520	4.6496e+06	87889775	2021-07-20	2021-07-20 18:22:46 UTC	dannyhughes	research	41.9906	-91.6657	Pyganodon grandis	Giant Floater Mussel	130983	Animalia	Mollusca	Bivalvia	Unionida	Unionidae	Pyganodon	Pyganodon grandis
533	15T 609837.31mE 4650059.16mN	15T	609837	4.65006e+06	92043107	2021-08-21	2021-08-21 22:13:20 UTC	samigobeli	research	41.9949	-91.6739	Pyganodon grandis	Giant Floater Mussel	130983	Animalia	Mollusca	Bivalvia	Unionida	Unionidae	Pyganodon	Pyganodon grandis
634	15T 610534.05mE 4649597.39mN	15T	610534	4.6496e+06	94531054	2021-09-11	2021-09-11 20:12:18 UTC	dannyhughes	research	41.9906	-91.6655	Pyganodon grandis	Giant Floater Mussel	130983	Animalia	Mollusca	Bivalvia	Unionida	Unionidae	Pyganodon	Pyganodon grandis
663	15T 609938.39mE 4650030.37mN	15T	609938	4.65003e+06	96131217	2021-09-25	2021-09-25 15:00:49 UTC	bianca361	research	41.9946	-91.6726	Pyganodon grandis	Giant Floater Mussel	130983	Animalia	Mollusca	Bivalvia	Unionida	Unionidae	Pyganodon	Pyganodon grandis
695	15T 610372.49mE 4649977.27mN	15T	610372	4.64998e+06	96160573	2021-09-25	2021-09-25 21:02:06 UTC	dannyhughes	research	41.9941	-91.6674	Philanthus gibbosus	Hump-backed Beewolf	133268	Animalia	Arthropoda	Insecta	Hymenoptera	Crabronidae	Philanthus	Philanthus gibbosus
693	15T 610305.46mE 4650039.26mN	15T	610305	4.65004e+06	96160127	2021-09-25	2021-09-25 21:12:53 UTC	dannyhughes	research	41.9946	-91.6682	Sinea diadema	Spined Assassin Bug	133977	Animalia	Arthropoda	Insecta	Hemiptera	Reduviidae	Sinea	Sinea diadema
783	15T 609795.69mE 4650003.97mN	15T	609796	4.65e+06	98665699	2021-08-21	2021-08-21 22:28:00 UTC	emilylarosa	research	41.9944	-91.6744	Sinea diadema	Spined Assassin Bug	133977	Animalia	Arthropoda	Insecta	Hemiptera	Reduviidae	Sinea	Sinea diadema
508	15T 610160.77mE 4649862.71mN	15T	610161	4.64986e+06	88901009	2021-07-24	2021-07-24 19:00:55 UTC	myranda_hadley	research	41.9931	-91.67	Ipomoea lacunosa	White Morning-glory	135262	Plantae	Tracheophyta	Magnoliopsida	Solanales	Convolvulaceae	Ipomoea	Ipomoea lacunosa
756	15T 610351.15mE 4650001.49mN	15T	610351	4.65e+06	98432884	2021-10-16	2021-10-16 21:55:42 UTC	dannyhughes	research	41.9943	-91.6677	Lygaeus turcicus	False Milkweed Bug	141626	Animalia	Arthropoda	Insecta	Hemiptera	Lygaeidae	Lygaeus	Lygaeus turcicus
758	15T 610355.09mE 4650006.08mN	15T	610355	4.65001e+06	98434645	2021-10-16	2021-10-16 19:57:50 UTC	dannyhughes	research	41.9943	-91.6676	Lygaeus turcicus	False Milkweed Bug	141626	Animalia	Arthropoda	Insecta	Hemiptera	Lygaeidae	Lygaeus	Lygaeus turcicus
776	15T 609830.11mE 4650120.25mN	15T	609830	4.65012e+06	98580625	2021-10-16	2021-10-16 20:03:13 UTC	sangai	research	41.9954	-91.6739	Lygaeus turcicus	False Milkweed Bug	141626	Animalia	Arthropoda	Insecta	Hemiptera	Lygaeidae	Lygaeus	Lygaeus turcicus
627	15T 610544.13mE 4649666.50mN	15T	610544	4.64967e+06	94530389	2021-09-11	2021-09-11 20:20:35 UTC	dannyhughes	research	41.9913	-91.6654	Orchelimum nigripes	Black-legged Meadow Katydid	143151	Animalia	Arthropoda	Insecta	Orthoptera	Tettigoniidae	Orchelimum	Orchelimum nigripes
525	15T 609837.75mE 4650142.99mN	15T	609838	4.65014e+06	92041646	2021-08-21	2021-08-21 22:06:55 UTC	dannyhughes	research	41.9956	-91.6738	Ammophila pictipennis		143571	Animalia	Arthropoda	Insecta	Hymenoptera	Sphecidae	Ammophila	Ammophila pictipennis
527	15T 609967.40mE 4650001.21mN	15T	609967	4.65e+06	92042095	2021-08-21	2021-08-21 21:41:13 UTC	samigobeli	research	41.9943	-91.6723	Ardea alba	Great Egret	144455	Animalia	Chordata	Aves	Pelecaniformes	Ardeidae	Ardea	Ardea alba
718	15T 610017.09mE 4649900.45mN	15T	610017	4.6499e+06	97482149	2021-08-21	2021-08-21 21:45:00 UTC	emilylarosa	research	41.9934	-91.6717	Ardea alba	Great Egret	144455	Animalia	Chordata	Aves	Pelecaniformes	Ardeidae	Ardea	Ardea alba
692	15T 610393.70mE 4649997.86mN	15T	610394	4.65e+06	96160047	2021-09-25	2021-09-25 21:22:15 UTC	dannyhughes	research	41.9943	-91.6672	Poecile atricapillus	Black-capped Chickadee	144815	Animalia	Chordata	Aves	Passeriformes	Paridae	Poecile	Poecile atricapillus
131	15T 610575.20mE 4649686.83mN	15T	610575	4.64969e+06	75084857	2021-04-24	2021-04-24 19:24:19 UTC	dannyhughes	research	41.9914	-91.665	Setophaga coronata	Yellow-rumped Warbler	145245	Animalia	Chordata	Aves	Passeriformes	Parulidae	Setophaga	Setophaga coronata
652	15T 610389.66mE 4650001.66mN	15T	610390	4.65e+06	94532849	2021-09-11	2021-09-11 18:10:01 UTC	dannyhughes	research	41.9943	-91.6672	Setophaga virens	Black-throated Green Warbler	145258	Animalia	Chordata	Aves	Passeriformes	Parulidae	Setophaga	Setophaga virens
197	15T 610344.48mE 4650038.96mN	15T	610344	4.65004e+06	78875069	2021-05-15	2021-05-15 12:01:18 UTC	laurvelez	research	41.9946	-91.6677	Spinus tristis	American Goldfinch	145310	Animalia	Chordata	Aves	Passeriformes	Fringillidae	Spinus	Spinus tristis
432	15T 610331.75mE 4650042.45mN	15T	610332	4.65004e+06	86503377	2021-07-10	2021-07-10 19:01:57 UTC	dannyhughes	research	41.9947	-91.6679	Spinus tristis	American Goldfinch	145310	Animalia	Chordata	Aves	Passeriformes	Fringillidae	Spinus	Spinus tristis
455	15T 610331.10mE 4650031.16mN	15T	610331	4.65003e+06	86514938	2021-07-10	2021-07-10 14:04:15 UTC	lyssieahern	research	41.9946	-91.6679	Spinus tristis	American Goldfinch	145310	Animalia	Chordata	Aves	Passeriformes	Fringillidae	Spinus	Spinus tristis
416	15T 610420.63mE 4649402.81mN	15T	610421	4.6494e+06	86483525	2021-07-10	2021-07-10 21:38:04 UTC	dannyhughes	research	41.9889	-91.6669	Eristalis transversa	Transverse-banded Flower Fly	145436	Animalia	Arthropoda	Insecta	Diptera	Syrphidae	Eristalis	Eristalis transversa
515	15T 610350.39mE 4650025.54mN	15T	610350	4.65003e+06	92040183	2021-08-21	2021-08-21 23:23:05 UTC	dannyhughes	research	41.9945	-91.6677	Toxomerus politus	Maize Calligrapher	146632	Animalia	Arthropoda	Insecta	Diptera	Syrphidae	Toxomerus	Toxomerus politus
697	15T 610340.63mE 4650012.63mN	15T	610341	4.65001e+06	96161053	2021-09-25	2021-09-25 20:23:07 UTC	dannyhughes	research	41.9944	-91.6678	Tetragnatha extensa		153757	Animalia	Arthropoda	Arachnida	Araneae	Tetragnathidae	Tetragnatha	Tetragnatha extensa
575	15T 609829.51mE 4649985.89mN	15T	609830	4.64999e+06	92832223	2021-08-28	2021-08-28 19:47:11 UTC	dannyhughes	research	41.9942	-91.674	Halictus ligatus	Ligated Furrow Bee	154298	Animalia	Arthropoda	Insecta	Hymenoptera	Halictidae	Halictus	Halictus ligatus
703	15T 610334.18mE 4650028.16mN	15T	610334	4.65003e+06	96161908	2021-09-25	2021-09-25 19:28:38 UTC	dannyhughes	research	41.9945	-91.6679	Eristalis flavipes	Orange-legged Drone Fly	200144	Animalia	Arthropoda	Insecta	Diptera	Syrphidae	Eristalis	Eristalis flavipes
766	15T 610354.63mE 4650005.31mN	15T	610355	4.65001e+06	98437540	2021-10-16	2021-10-16 18:44:02 UTC	dannyhughes	research	41.9943	-91.6676	Trachelipus rathkii	Rathke’s Woodlouse	203479	Animalia	Arthropoda	Malacostraca	Isopoda	Trachelipodidae	Trachelipus	Trachelipus rathkii
583	15T 609971.97mE 4649607.75mN	15T	609972	4.64961e+06	92833646	2021-08-28	2021-08-28 19:28:22 UTC	dannyhughes	research	41.9908	-91.6723	Chauliognathus pensylvanicus	Goldenrod Soldier Beetle	216649	Animalia	Arthropoda	Insecta	Coleoptera	Cantharidae	Chauliognathus	Chauliognathus pensylvanicus
603	15T 610289.58mE 4650048.47mN	15T	610290	4.65005e+06	92838881	2021-08-28	2021-08-28 17:46:31 UTC	dannyhughes	research	41.9947	-91.6684	Chauliognathus pensylvanicus	Goldenrod Soldier Beetle	216649	Animalia	Arthropoda	Insecta	Coleoptera	Cantharidae	Chauliognathus	Chauliognathus pensylvanicus
621	15T 609946.96mE 4649644.97mN	15T	609947	4.64964e+06	94529468	2021-09-11	2021-09-11 21:35:41 UTC	dannyhughes	research	41.9911	-91.6726	Chauliognathus pensylvanicus	Goldenrod Soldier Beetle	216649	Animalia	Arthropoda	Insecta	Coleoptera	Cantharidae	Chauliognathus	Chauliognathus pensylvanicus
637	15T 609830.23mE 4649944.20mN	15T	609830	4.64994e+06	94531245	2021-09-11	2021-09-11 21:42:03 UTC	jaclynadams	research	41.9939	-91.674	Chauliognathus pensylvanicus	Goldenrod Soldier Beetle	216649	Animalia	Arthropoda	Insecta	Coleoptera	Cantharidae	Chauliognathus	Chauliognathus pensylvanicus
537	15T 609940.75mE 4650162.67mN	15T	609941	4.65016e+06	92043741	2021-08-21	2021-08-21 21:47:23 UTC	dannyhughes	research	41.9958	-91.6726	Neandra brunnea	Pole Borer	225465	Animalia	Arthropoda	Insecta	Coleoptera	Cerambycidae	Neandra	Neandra brunnea
705	15T 610323.07mE 4650027.06mN	15T	610323	4.65003e+06	96162273	2021-09-25	2021-09-25 19:15:25 UTC	dannyhughes	research	41.9945	-91.668	Chrysis angolensis	Metallic Bluish-green Cuckoo Wasp	325772	Animalia	Arthropoda	Insecta	Hymenoptera	Chrysididae	Chrysis	Chrysis angolensis
297	15T 610333.98mE 4650094.51mN	15T	610334	4.65009e+06	82734055	2021-06-12	2021-06-12 15:06:13 UTC	farahsuboh	research	41.9951	-91.6679	Aculops rhois	Poison Ivy Leaf Mite	334439	Animalia	Arthropoda	Arachnida	Endeostigmata	Eriophyidae	Aculops	Aculops rhois
358	15T 610066.54mE 4649524.14mN	15T	610067	4.64952e+06	84630781	2021-06-26	2021-06-26 17:01:33 UTC	lyssieahern	research	41.99	-91.6712	Eristalis stipator	Yellow-shouldered Drone Fly	425250	Animalia	Arthropoda	Insecta	Diptera	Syrphidae	Eristalis	Eristalis stipator
306	15T 610252.69mE 4650071.80mN	15T	610253	4.65007e+06	82760095	2021-06-12	2021-06-12 19:25:01 UTC	dannyhughes	research	41.9949	-91.6688	Lucilia coeruleiviridis	Blue-green Bottle Fly	493838	Animalia	Arthropoda	Insecta	Diptera	Calliphoridae	Lucilia	Lucilia coeruleiviridis
427	15T 610318.13mE 4650030.98mN	15T	610318	4.65003e+06	86490741	2021-07-10	2021-07-10 19:38:41 UTC	dannyhughes	research	41.9946	-91.6681	Melissodes bimaculatus	Two-spotted Longhorn Bee	567666	Animalia	Arthropoda	Insecta	Hymenoptera	Apidae	Melissodes	Melissodes bimaculatus
470	15T 610523.81mE 4649786.50mN	15T	610524	4.64979e+06	86515924	2021-07-10	2021-07-10 16:55:03 UTC	lyssieahern	research	41.9923	-91.6656	Melissodes bimaculatus	Two-spotted Longhorn Bee	567666	Animalia	Arthropoda	Insecta	Hymenoptera	Apidae	Melissodes	Melissodes bimaculatus
249	15T 609816.24mE 4650101.52mN	15T	609816	4.6501e+06	80980199	2021-05-30	2021-05-30 23:04:19 UTC	dannyhughes	research	41.9953	-91.6741	Faxonius virilis	Virile Crayfish	776137	Animalia	Arthropoda	Malacostraca	Decapoda	Cambaridae	Faxonius	Faxonius virilis
438	15T 609834.72mE 4650145.54mN	15T	609835	4.65015e+06	86505536	2021-07-10	2021-07-10 22:27:03 UTC	jaclynadams	research	41.9957	-91.6739	Dryobates pubescens	Downy Woodpecker	792988	Animalia	Chordata	Aves	Piciformes	Picidae	Dryobates	Dryobates pubescens
636	15T 610376.54mE 4649951.59mN	15T	610377	4.64995e+06	94531111	2021-09-11	2021-09-11 18:54:32 UTC	dannyhughes	research	41.9938	-91.6674	Dryobates pubescens	Downy Woodpecker	792988	Animalia	Chordata	Aves	Piciformes	Picidae	Dryobates	Dryobates pubescens
71	15T 609893.25mE 4650148.33mN	15T	609893	4.65015e+06	75058335	2021-04-24	2021-04-24 12:05:59 UTC	henry_hoyhtya	research	41.9957	-91.6732	Gerrini		936827	Animalia	Arthropoda	Insecta	Hemiptera	Gerridae
83	15T 609868.51mE 4650130.32mN	15T	609869	4.65013e+06	75061407	2021-04-24	2021-04-24 12:28:21 UTC	ljmosinski	research	41.9955	-91.6735	Gerrini		936827	Animalia	Arthropoda	Insecta	Hemiptera	Gerridae
765	15T 610309.42mE 4650043.55mN	15T	610309	4.65004e+06	98437456	2021-10-16	2021-10-16 18:47:46 UTC	dannyhughes	research	41.9947	-91.6682	Eupeodes americanus		963010	Animalia	Arthropoda	Insecta	Diptera	Syrphidae	Eupeodes
365	15T 609980.90mE 4650143.30mN	15T	609981	4.65014e+06	84631820	2021-06-26	2021-06-26 21:27:38 UTC	dannyhughes	research	41.9956	-91.6721	Lasius americanus	American Cornfield Ant	966095	Animalia	Arthropoda	Insecta	Hymenoptera	Formicidae	Lasius	Lasius americanus
298	15T 610386.76mE 4649998.64mN	15T	610387	4.65e+06	82758184	2021-06-12	2021-06-12 22:37:43 UTC	jaclynadams	research	41.9943	-91.6672	Neogale vison	American Mink	1264432	Animalia	Chordata	Mammalia	Carnivora	Mustelidae	Neogale	Neogale vison

## Sheet: Past work (2008-2021)
FID	to_Easting	to_Northin	id	observed_o	user_login	quality_gr	latitude	longitude	scientific	common_nam	taxon_id	taxon_king	taxon_phyl	taxon_clas	taxon_orde	taxon_fami	to_UTMcm
89	610444	4.64951e+06	64830760	2020/11/12 9:40 AM CST	oviscanadensis_connerties	research	41.9899	-91.6666	Fulica americana	American Coot	473	Animalia	Chordata	Aves	Gruiformes	Rallidae	15T 610444.16mE 4649513.35mN
144	609744	4.6502e+06	70065892	2021/02/22 3:58 PM CST	oviscanadensis_connerties	research	41.9962	-91.675	Megaceryle alcyon	Belted Kingfisher	2548	Animalia	Chordata	Aves	Coraciiformes	Alcedinidae	15T 609744.09mE 4650203.41mN
31	610314	4.64945e+06	35242898	Sun Nov 03 2019 10:57:38 GMT-0600 (CST)	rarodgers	research	41.9893	-91.6682	Podiceps auritus	Horned Grebe	4209	Animalia	Chordata	Aves	Podicipediformes	Podicipedidae	15T 610314.31mE 4649450.99mN
87	610462	4.64958e+06	64830758	2020/11/12 9:35 AM CST	oviscanadensis_connerties	research	41.9905	-91.6664	Podilymbus podiceps	Pied-billed Grebe	4246	Animalia	Chordata	Aves	Podicipediformes	Podicipedidae	15T 610462.47mE 4649584.26mN
57	609983	4.65011e+06	59174475	2020-09-10 4:05:52 PM CDT	kalina_sq	research	41.9953	-91.6721	Phalacrocorax auritus	Double-crested Cormorant	4265	Animalia	Chordata	Aves	Suliformes	Phalacrocoracidae	15T 609982.69mE 4650105.34mN
5	610528	4.64965e+06	17805042	2018-10-24 1:59:37 PM CDT	rwheidt	research	41.9911	-91.6656	Pelecanus erythrorhynchos	American White Pelican	4334	Animalia	Chordata	Aves	Pelecaniformes	Pelecanidae	15T 610528.12mE 4649649.10mN
29	610487	4.64956e+06	34647183	2019/10/19 7:41 AM EDT	dean_hester	research	41.9903	-91.6661	Pelecanus erythrorhynchos	American White Pelican	4334	Animalia	Chordata	Aves	Pelecaniformes	Pelecanidae	15T 610487.40mE 4649564.28mN
105	610687	4.64941e+06	64830783	2020/11/12 10:38 AM CST	oviscanadensis_connerties	research	41.989	-91.6637	Pelecanus erythrorhynchos	American White Pelican	4334	Animalia	Chordata	Aves	Pelecaniformes	Pelecanidae	15T 610686.57mE 4649413.45mN
110	610004	4.65007e+06	65116802	2020/11/15 9:36 AM CST	oviscanadensis_connerties	research	41.9949	-91.6719	Pelecanus erythrorhynchos	American White Pelican	4334	Animalia	Chordata	Aves	Pelecaniformes	Pelecanidae	15T 610003.52mE 4650067.46mN
91	610267	4.64955e+06	64830763	2020/11/12 9:48 AM CST	oviscanadensis_connerties	research	41.9902	-91.6688	Larus delawarensis	Ring-billed Gull	4364	Animalia	Chordata	Aves	Charadriiformes	Laridae	15T 610267.28mE 4649549.09mN
97	610697	4649407	64830771	2020/11/12 10:38 AM CST	oviscanadensis_connerties	research	41.9889	-91.6636	Larus delawarensis	Ring-billed Gull	4364	Animalia	Chordata	Aves	Charadriiformes	Laridae	15T 610696.95mE 4649407.00mN
111	610693	4.64941e+06	65116803	2020/11/15 9:53 AM CST	oviscanadensis_connerties	research	41.9889	-91.6637	Larus delawarensis	Ring-billed Gull	4364	Animalia	Chordata	Aves	Charadriiformes	Laridae	15T 610692.96mE 4649410.97mN
152	609933	4.6497e+06	70966630	2021-03-10 3:54:45 PM CST	kalina_sq	research	41.9916	-91.6728	Larus delawarensis	Ring-billed Gull	4364	Animalia	Chordata	Aves	Charadriiformes	Laridae	15T 609932.87mE 4649696.43mN
30	610122	4.64997e+06	34723780	2019/10/20 11:14 AM EDT	dean_hester	research	41.994	-91.6704	Xema sabini	Sabine's Gull	4571	Animalia	Chordata	Aves	Charadriiformes	Laridae	15T 610122.03mE 4649966.85mN
107	609956	4.64964e+06	65116798	2020/11/15 9:12 AM CST	oviscanadensis_connerties	research	41.9911	-91.6725	Falco sparverius	American Kestrel	4665	Animalia	Chordata	Aves	Falconiformes	Falconidae	15T 609956.17mE 4649636.90mN
116	610498	4.64988e+06	66026773	2020/11/26 11:27 AM CST	oviscanadensis_connerties	research	41.9932	-91.6659	Falco sparverius	American Kestrel	4665	Animalia	Chordata	Aves	Falconiformes	Falconidae	15T 610497.80mE 4649881.44mN
162	609815	4.64998e+06	71463666	2021/03/16 4:48 PM CDT	oviscanadensis_connerties	research	41.9942	-91.6741	Falco sparverius	American Kestrel	4665	Animalia	Chordata	Aves	Falconiformes	Falconidae	15T 609814.87mE 4649979.08mN
39	609996	4.65011e+06	58453172	2020-09-03 3:41:25 PM CDT	kalina_sq	research	41.9953	-91.6719	Ardea herodias	Great Blue Heron	4956	Animalia	Chordata	Aves	Pelecaniformes	Ardeidae	15T 609995.51mE 4650109.55mN
52	610304	4.64957e+06	59045229	2020-09-09 10:00:06 AM CDT	kasumi1	research	41.9905	-91.6683	Ardea herodias	Great Blue Heron	4956	Animalia	Chordata	Aves	Pelecaniformes	Ardeidae	15T 610303.63mE 4649573.86mN
59	609994	4.6501e+06	59175584	2020-09-10 1:45:25 PM CDT	kalina_sq	research	41.9953	-91.672	Ardea herodias	Great Blue Heron	4956	Animalia	Chordata	Aves	Pelecaniformes	Ardeidae	15T 609993.52mE 4650103.96mN
71	609778	4650124	61330935	Wed Sep 16 2020 12:48:48 GMT-0500 (CDT)	cptj4y	research	41.9955	-91.6746	Ardea herodias	Great Blue Heron	4956	Animalia	Chordata	Aves	Pelecaniformes	Ardeidae	15T 609777.77mE 4650124.00mN
72	609777	4.65008e+06	61331069	Wed Sep 16 2020 12:56:30 GMT-0500 (CDT)	cptj4y	research	41.9951	-91.6746	Ardea herodias	Great Blue Heron	4956	Animalia	Chordata	Aves	Pelecaniformes	Ardeidae	15T 609776.64mE 4650080.86mN
148	609958	4.6501e+06	70789739	2021/03/05 5:53 PM CST	oviscanadensis_connerties	research	41.9952	-91.6724	Ardea herodias	Great Blue Heron	4956	Animalia	Chordata	Aves	Pelecaniformes	Ardeidae	15T 609958.05mE 4650100.23mN
53	609773	4.65011e+06	59155865	Thu Sep 10 2020 14:42:05 GMT-0500 (CDT)	corvidologist	research	41.9954	-91.6746	Butorides virescens	Green Heron	5020	Animalia	Chordata	Aves	Pelecaniformes	Ardeidae	15T 609772.59mE 4650111.29mN
103	610585	4.64974e+06	64830780	2020/11/12 10:59 AM CST	oviscanadensis_connerties	research	41.992	-91.6649	Buteo jamaicensis	Red-tailed Hawk	5212	Animalia	Chordata	Aves	Accipitriformes	Accipitridae	15T 610585.40mE 4649744.86mN
141	610320	4.64954e+06	68389370	2021/01/20 3:53 PM CST	oviscanadensis_connerties	research	41.9902	-91.6681	Haliaeetus leucocephalus	Bald Eagle	5305	Animalia	Chordata	Aves	Accipitriformes	Accipitridae	15T 610320.12mE 4649544.91mN
153	609858	4.64988e+06	70966682	2021-03-10 3:49:20 PM CST	kalina_sq	research	41.9933	-91.6737	Haliaeetus leucocephalus	Bald Eagle	5305	Animalia	Chordata	Aves	Accipitriformes	Accipitridae	15T 609857.54mE 4649879.74mN
156	610379	4.64961e+06	71040474	2021/03/11 4:48 PM CST	oviscanadensis_connerties	research	41.9908	-91.6674	Haliaeetus leucocephalus	Bald Eagle	5305	Animalia	Chordata	Aves	Accipitriformes	Accipitridae	15T 610379.23mE 4649613.90mN
44	609751	4.6502e+06	58470968	Thu Sep 03 2020 14:37:07 GMT-0500 (CDT)	ryleymcmahen	research	41.9962	-91.6749	Anas platyrhynchos	Mallard	6930	Animalia	Chordata	Aves	Anseriformes	Anatidae	15T 609750.87mE 4650202.63mN
46	609778	4.65012e+06	58518312	2020/09/03 2:04 PM CDT	hbiegger	research	41.9954	-91.6746	Anas platyrhynchos	Mallard	6930	Animalia	Chordata	Aves	Anseriformes	Anatidae	15T 609777.91mE 4650117.90mN
48	610066	4.65029e+06	58767005	2020-09-06 4:05:47 PM CDT	kasumi1	research	41.9969	-91.6711	Anas platyrhynchos	Mallard	6930	Animalia	Chordata	Aves	Anseriformes	Anatidae	15T 610066.13mE 4650287.79mN
49	609762	4.65013e+06	58767329	2020-09-06 4:07:23 PM CDT	kasumi1	research	41.9955	-91.6748	Anas platyrhynchos	Mallard	6930	Animalia	Chordata	Aves	Anseriformes	Anatidae	15T 609761.57mE 4650128.06mN
50	609768	4.65013e+06	58767487	2020-09-06 4:09:37 PM CDT	kasumi1	research	41.9955	-91.6747	Anas platyrhynchos	Mallard	6930	Animalia	Chordata	Aves	Anseriformes	Anatidae	15T 609767.52mE 4650129.02mN
51	609719	4.65022e+06	59043006	Thu Sep 03 2020 15:15:51 GMT-0500 (CDT)	samanthahernandez2	research	41.9963	-91.6753	Anas platyrhynchos	Mallard	6930	Animalia	Chordata	Aves	Anseriformes	Anatidae	15T 609719.05mE 4650215.64mN
60	610004	4.65011e+06	59249055	2020/09/10 12:47 PM CDT	hbiegger	research	41.9953	-91.6718	Anas platyrhynchos	Mallard	6930	Animalia	Chordata	Aves	Anseriformes	Anatidae	15T 610004.50mE 4650108.45mN
63	609986	4.65009e+06	59370142	Thu Sep 10 2020 14:30:59 GMT-0500 (CDT)	sarahmoffett	research	41.9952	-91.6721	Anas platyrhynchos	Mallard	6930	Animalia	Chordata	Aves	Anseriformes	Anatidae	15T 609985.66mE 4650090.60mN
69	609985	4.65011e+06	60254371	Thu Sep 10 2020 14:34:23 GMT-0500 (CDT)	ltierney	research	41.9953	-91.6721	Anas platyrhynchos	Mallard	6930	Animalia	Chordata	Aves	Anseriformes	Anatidae	15T 609985.03mE 4650105.75mN
74	609767	4.65013e+06	61331266	Wed Sep 16 2020 12:33:31 GMT-0500 (CDT)	cptj4y	research	41.9955	-91.6747	Anas platyrhynchos	Mallard	6930	Animalia	Chordata	Aves	Anseriformes	Anatidae	15T 609767.16mE 4650131.06mN
75	609771	4.65013e+06	61331462	Wed Sep 16 2020 12:33:09 GMT-0500 (CDT)	cptj4y	research	41.9956	-91.6747	Anas platyrhynchos	Mallard	6930	Animalia	Chordata	Aves	Anseriformes	Anatidae	15T 609770.70mE 4650134.82mN
76	609773	4.65016e+06	61331494	Wed Sep 16 2020 12:30:11 GMT-0500 (CDT)	cptj4y	research	41.9958	-91.6746	Anas platyrhynchos	Mallard	6930	Animalia	Chordata	Aves	Anseriformes	Anatidae	15T 609773.00mE 4650155.21mN
77	609776	4.65016e+06	61331541	Wed Sep 16 2020 12:28:43 GMT-0500 (CDT)	cptj4y	research	41.9958	-91.6746	Anas platyrhynchos	Mallard	6930	Animalia	Chordata	Aves	Anseriformes	Anatidae	15T 609776.06mE 4650162.66mN
78	609776	4.65016e+06	61331574	Wed Sep 16 2020 12:28:38 GMT-0500 (CDT)	cptj4y	research	41.9958	-91.6746	Anas platyrhynchos	Mallard	6930	Animalia	Chordata	Aves	Anseriformes	Anatidae	15T 609776.13mE 4650158.22mN
79	609766	4.65018e+06	61331747	Thu Sep 03 2020 14:01:27 GMT-0500 (CDT)	cptj4y	research	41.996	-91.6747	Anas platyrhynchos	Mallard	6930	Animalia	Chordata	Aves	Anseriformes	Anatidae	15T 609766.40mE 4650180.10mN
80	609765	4.65018e+06	61331772	Thu Sep 03 2020 13:57:21 GMT-0500 (CDT)	cptj4y	research	41.996	-91.6747	Anas platyrhynchos	Mallard	6930	Animalia	Chordata	Aves	Anseriformes	Anatidae	15T 609765.03mE 4650179.71mN
81	609765	4.65018e+06	61332165	Thu Sep 03 2020 13:53:17 GMT-0500 (CDT)	cptj4y	research	41.996	-91.6747	Anas platyrhynchos	Mallard	6930	Animalia	Chordata	Aves	Anseriformes	Anatidae	15T 609765.01mE 4650181.19mN
82	610309	4.65004e+06	61350035	Wed Sep 30 2020 17:39:29 GMT-0500 (CDT)	cptj4y	research	41.9947	-91.6682	Anas platyrhynchos	Mallard	6930	Animalia	Chordata	Aves	Anseriformes	Anatidae	15T 610308.83mE 4650042.84mN
83	609957	4.65011e+06	64155118	2020/10/29 8:31 AM CDT	hbiegger	research	41.9953	-91.6724	Anas platyrhynchos	Mallard	6930	Animalia	Chordata	Aves	Anseriformes	Anatidae	15T 609957.07mE 4650111.85mN
92	610333	4.64942e+06	64830764	2020/11/12 9:47 AM CST	oviscanadensis_connerties	research	41.9891	-91.668	Anas platyrhynchos	Mallard	6930	Animalia	Chordata	Aves	Anseriformes	Anatidae	15T 610332.83mE 4649422.58mN
126	609828	4.65002e+06	67873978	2021/01/10 12:36 PM CST	oviscanadensis_connerties	research	41.9946	-91.674	Anas platyrhynchos	Mallard	6930	Animalia	Chordata	Aves	Anseriformes	Anatidae	15T 609827.93mE 4650024.12mN
129	609975	4.65006e+06	67873982	2021/01/10 12:49 PM CST	oviscanadensis_connerties	research	41.9948	-91.6722	Anas platyrhynchos	Mallard	6930	Animalia	Chordata	Aves	Anseriformes	Anatidae	15T 609975.06mE 4650056.73mN
137	609806	4.65005e+06	68389366	2021/01/20 3:20 PM CST	oviscanadensis_connerties	research	41.9948	-91.6742	Anas platyrhynchos	Mallard	6930	Animalia	Chordata	Aves	Anseriformes	Anatidae	15T 609806.42mE 4650052.94mN
145	609832	4.65005e+06	70065893	2021/02/22 4:07 PM CST	oviscanadensis_connerties	research	41.9948	-91.6739	Anas platyrhynchos	Mallard	6930	Animalia	Chordata	Aves	Anseriformes	Anatidae	15T 609831.72mE 4650050.86mN
149	610338	4.6494e+06	70966541	2021-03-10 4:07:00 PM CST	kalina_sq	research	41.9889	-91.6679	Anas platyrhynchos	Mallard	6930	Animalia	Chordata	Aves	Anseriformes	Anatidae	15T 610337.67mE 4649402.24mN
150	610193	4.64948e+06	70966563	2021-03-10 4:03:35 PM CST	kalina_sq	research	41.9896	-91.6697	Anas platyrhynchos	Mallard	6930	Animalia	Chordata	Aves	Anseriformes	Anatidae	15T 610192.80mE 4649482.66mN
165	610016	4.65008e+06	71522802	2021-03-18 6:18:14 PM CDT	kalina_sq	research	41.9951	-91.6717	Anas platyrhynchos	Mallard	6930	Animalia	Chordata	Aves	Anseriformes	Anatidae	15T 610016.14mE 4650084.88mN
130	609907	4.65009e+06	67873984	2021/01/10 12:52 PM CST	oviscanadensis_connerties	research	41.9951	-91.673	Anas acuta	Northern Pintail	6933	Animalia	Chordata	Aves	Anseriformes	Anatidae	15T 609907.03mE 4650087.56mN
138	609800	4.65007e+06	68389367	2021/01/20 3:33 PM CST	oviscanadensis_connerties	research	41.995	-91.6743	Anas acuta	Northern Pintail	6933	Animalia	Chordata	Aves	Anseriformes	Anatidae	15T 609800.19mE 4650067.45mN
98	610673	4.64943e+06	64830772	2020/11/12 10:40 AM CST	oviscanadensis_connerties	research	41.9891	-91.6639	Anas crecca	Green-winged Teal	6937	Animalia	Chordata	Aves	Anseriformes	Anatidae	15T 610673.49mE 4649429.66mN
100	610725	4.64952e+06	64830776	2020/11/12 10:50 AM CST	oviscanadensis_connerties	research	41.9899	-91.6632	Anas crecca	Green-winged Teal	6937	Animalia	Chordata	Aves	Anseriformes	Anatidae	15T 610725.35mE 4649523.87mN
102	610748	4.64953e+06	64830779	2020/11/12 10:52 AM CST	oviscanadensis_connerties	research	41.99	-91.663	Anas crecca	Green-winged Teal	6937	Animalia	Chordata	Aves	Anseriformes	Anatidae	15T 610747.92mE 4649531.31mN
124	609879	4.65e+06	67873976	2021/01/10 12:32 PM CST	oviscanadensis_connerties	research	41.9943	-91.6734	Anas crecca	Green-winged Teal	6937	Animalia	Chordata	Aves	Anseriformes	Anatidae	15T 609878.98mE 4649998.44mN
95	610148	4.64975e+06	64830768	2020/11/12 9:58 AM CST	oviscanadensis_connerties	research	41.9921	-91.6702	Bucephala clangula	Common Goldeneye	6990	Animalia	Chordata	Aves	Anseriformes	Anatidae	15T 610147.95mE 4649754.46mN
109	610169	4.64975e+06	65116801	2020/11/15 9:24 AM CST	oviscanadensis_connerties	research	41.992	-91.6699	Bucephala clangula	Common Goldeneye	6990	Animalia	Chordata	Aves	Anseriformes	Anatidae	15T 610168.70mE 4649748.85mN
120	610277	4.64976e+06	66026779	2020/11/26 11:38 AM CST	oviscanadensis_connerties	research	41.9921	-91.6686	Bucephala clangula	Common Goldeneye	6990	Animalia	Chordata	Aves	Anseriformes	Anatidae	15T 610277.17mE 4649759.79mN
114	610208	4.64987e+06	66026771	2020/11/26 11:07 AM CST	oviscanadensis_connerties	research	41.9931	-91.6694	Bucephala albeola	Bufflehead	6993	Animalia	Chordata	Aves	Anseriformes	Anatidae	15T 610207.90mE 4649870.29mN
163	610067	4.65003e+06	71463668	2021/03/16 4:58 PM CDT	oviscanadensis_connerties	research	41.9946	-91.6711	Bucephala albeola	Bufflehead	6993	Animalia	Chordata	Aves	Anseriformes	Anatidae	15T 610066.52mE 4650029.82mN
118	609974	4.64968e+06	66026775	2020/11/26 11:39 AM CST	oviscanadensis_connerties	research	41.9915	-91.6723	Mergus serrator	Red-breasted Merganser	6996	Animalia	Chordata	Aves	Anseriformes	Anatidae	15T 609974.47mE 4649682.47mN
117	610317	4.64968e+06	66026774	2020/11/26 11:38 AM CST	oviscanadensis_connerties	research	41.9914	-91.6681	Aythya collaris	Ring-necked Duck	7044	Animalia	Chordata	Aves	Anseriformes	Anatidae	15T 610317.46mE 4649684.25mN
112	610204	4.64981e+06	66026769	2020/11/26 11:06 AM CST	oviscanadensis_connerties	research	41.9926	-91.6695	Aythya marila	Greater Scaup	7047	Animalia	Chordata	Aves	Anseriformes	Anatidae	15T 610203.56mE 4649806.46mN
94	610144	4.6498e+06	64830767	2020/11/12 9:55 AM CST	oviscanadensis_connerties	research	41.9925	-91.6702	Aythya affinis	Lesser Scaup	7054	Animalia	Chordata	Aves	Anseriformes	Anatidae	15T 610144.44mE 4649802.23mN
119	610279	4.64976e+06	66026777	2020/11/26 11:40 AM CST	oviscanadensis_connerties	research	41.9921	-91.6686	Aythya affinis	Lesser Scaup	7054	Animalia	Chordata	Aves	Anseriformes	Anatidae	15T 610278.95mE 4649758.37mN
161	610170	4.64985e+06	71463665	2021/03/16 4:48 PM CDT	oviscanadensis_connerties	research	41.993	-91.6699	Aythya affinis	Lesser Scaup	7054	Animalia	Chordata	Aves	Anseriformes	Anatidae	15T 610169.60mE 4649851.52mN
166	609945	4.64967e+06	71522861	2021-03-18 6:37:45 PM CDT	kalina_sq	research	41.9914	-91.6726	Aythya affinis	Lesser Scaup	7054	Animalia	Chordata	Aves	Anseriformes	Anatidae	15T 609945.24mE 4649670.70mN
113	610297	4.64971e+06	66026770	2020/11/26 11:07 AM CST	oviscanadensis_connerties	research	41.9917	-91.6684	Aythya americana	Redhead	7056	Animalia	Chordata	Aves	Anseriformes	Anatidae	15T 610297.44mE 4649714.05mN
147	609882	4.65002e+06	70789737	2021/03/05 5:47 PM CST	oviscanadensis_connerties	research	41.9945	-91.6733	Aythya americana	Redhead	7056	Animalia	Chordata	Aves	Anseriformes	Anatidae	15T 609881.94mE 4650019.90mN
160	610087	4.6498e+06	71463664	2021/03/16 4:39 PM CDT	oviscanadensis_connerties	research	41.9926	-91.6709	Aythya valisineria	Canvasback	7057	Animalia	Chordata	Aves	Anseriformes	Anatidae	15T 610087.24mE 4649803.54mN
3	610373	4.64999e+06	6222543	Sat May 13 2017 12:00:18 GMT-0500 (CDT)	meredithiven	research	41.9942	-91.6674	Branta canadensis	Canada Goose	7089	Animalia	Chordata	Aves	Anseriformes	Anatidae	15T 610372.95mE 4649985.91mN
104	610681	4.64942e+06	64830781	2020/11/12 10:38 AM CST	oviscanadensis_connerties	research	41.989	-91.6638	Branta canadensis	Canada Goose	7089	Animalia	Chordata	Aves	Anseriformes	Anatidae	15T 610681.10mE 4649422.22mN
108	610194	4.64949e+06	65116799	2020/11/15 9:23 AM CST	oviscanadensis_connerties	research	41.9897	-91.6697	Branta canadensis	Canada Goose	7089	Animalia	Chordata	Aves	Anseriformes	Anatidae	15T 610194.09mE 4649492.42mN
127	609838	4.65003e+06	67873979	2021/01/10 12:36 PM CST	oviscanadensis_connerties	research	41.9947	-91.6739	Branta canadensis	Canada Goose	7089	Animalia	Chordata	Aves	Anseriformes	Anatidae	15T 609837.94mE 4650034.27mN
136	609854	4.65003e+06	68389365	2021/01/20 3:16 PM CST	oviscanadensis_connerties	research	41.9946	-91.6737	Branta canadensis	Canada Goose	7089	Animalia	Chordata	Aves	Anseriformes	Anatidae	15T 609854.30mE 4650031.32mN
143	609809	4.65006e+06	68500019	2021/01/21 4:06 PM CST	oviscanadensis_connerties	research	41.9949	-91.6742	Branta canadensis	Canada Goose	7089	Animalia	Chordata	Aves	Anseriformes	Anatidae	15T 609809.26mE 4650064.06mN
154	609775	4.65015e+06	70966711	2021-03-10 3:37:40 PM CST	kalina_sq	research	41.9957	-91.6746	Branta canadensis	Canada Goose	7089	Animalia	Chordata	Aves	Anseriformes	Anatidae	15T 609775.42mE 4650145.01mN
125	609854	4.65e+06	67873977	2021/01/10 12:35 PM CST	oviscanadensis_connerties	research	41.9944	-91.6737	Aix sponsa	Wood Duck	7107	Animalia	Chordata	Aves	Anseriformes	Anatidae	15T 609854.14mE 4650003.78mN
135	609850	4.65003e+06	68389364	2021/01/20 3:11 PM CST	oviscanadensis_connerties	research	41.9947	-91.6737	Aix sponsa	Wood Duck	7107	Animalia	Chordata	Aves	Anseriformes	Anatidae	15T 609849.58mE 4650034.80mN
146	609873	4.65001e+06	70789735	2021/03/04 4:44 PM CST	oviscanadensis_connerties	research	41.9944	-91.6734	Aix sponsa	Wood Duck	7107	Animalia	Chordata	Aves	Anseriformes	Anatidae	15T 609872.65mE 4650010.25mN
40	609773	4.65009e+06	58453341	2020-09-03 2:30:26 PM CDT	kalina_sq	research	41.9952	-91.6746	Corvus brachyrhynchos	American Crow	8021	Animalia	Chordata	Aves	Passeriformes	Corvidae	15T 609773.32mE 4650087.29mN
123	610442	4.64957e+06	67873975	2021/01/10 12:21 PM CST	oviscanadensis_connerties	research	41.9904	-91.6667	Corvus brachyrhynchos	American Crow	8021	Animalia	Chordata	Aves	Passeriformes	Corvidae	15T 610441.91mE 4649574.51mN
134	610339	4.64941e+06	67873988	2021/01/10 1:17 PM CST	oviscanadensis_connerties	research	41.989	-91.6679	Melospiza melodia	Song Sparrow	9100	Animalia	Chordata	Aves	Passeriformes	Passerellidae	15T 610338.82mE 4649413.92mN
158	610539	4.64956e+06	71040477	2021/03/11 5:13 PM CST	oviscanadensis_connerties	research	41.9903	-91.6655	Melospiza melodia	Song Sparrow	9100	Animalia	Chordata	Aves	Passeriformes	Passerellidae	15T 610538.99mE 4649562.59mN
157	610284	4.64947e+06	71040475	2021/03/11 5:06 PM CST	oviscanadensis_connerties	research	41.9895	-91.6686	Agelaius phoeniceus	Red-winged Blackbird	9744	Animalia	Chordata	Aves	Passeriformes	Icteridae	15T 610284.08mE 4649466.30mN
86	610560	4.64978e+06	64830757	2020/11/12 9:30 AM CST	oviscanadensis_connerties	research	41.9923	-91.6652	Junco hyemalis	Dark-eyed Junco	10094	Animalia	Chordata	Aves	Passeriformes	Passerellidae	15T 610559.83mE 4649778.83mN
38	610042	4.65007e+06	58453045	2020-09-03 3:44:05 PM CDT	kalina_sq	research	41.995	-91.6714	Hirundo rustica	Barn Swallow	11901	Animalia	Chordata	Aves	Passeriformes	Hirundinidae	15T 610041.66mE 4650071.70mN
151	610416	4.64937e+06	70966573	2021-03-10 4:09:40 PM CST	kalina_sq	research	41.9886	-91.667	Turdus migratorius	American Robin	12727	Animalia	Chordata	Aves	Passeriformes	Turdidae	15T 610416.39mE 4649371.69mN
93	610272	4.64947e+06	64830765	2020/11/12 9:52 AM CST	oviscanadensis_connerties	research	41.9895	-91.6687	Passer domesticus	House Sparrow	13858	Animalia	Chordata	Aves	Passeriformes	Passeridae	15T 610272.31mE 4649467.69mN
132	609818	4.65e+06	67873986	2021/01/10 1:05 PM CST	oviscanadensis_connerties	research	41.9943	-91.6741	Passer domesticus	House Sparrow	13858	Animalia	Chordata	Aves	Passeriformes	Passeridae	15T 609817.79mE 4649995.85mN
85	610377	4.64997e+06	64830756	2020/11/12 9:27 AM CST	oviscanadensis_connerties	research	41.994	-91.6674	Sturnus vulgaris	European Starling	14850	Animalia	Chordata	Aves	Passeriformes	Sturnidae	15T 610376.61mE 4649969.01mN
139	609791	4.65004e+06	68389368	2021/01/20 3:38 PM CST	oviscanadensis_connerties	research	41.9948	-91.6744	Sturnus vulgaris	European Starling	14850	Animalia	Chordata	Aves	Passeriformes	Sturnidae	15T 609791.45mE 4650043.63mN
58	609984	4.6501e+06	59174713	2020-09-10 3:59:34 PM CDT	kalina_sq	research	41.9953	-91.6721	Dumetella carolinensis	Gray Catbird	14995	Animalia	Chordata	Aves	Passeriformes	Mimidae	15T 609983.63mE 4650103.50mN
68	609992	4.6501e+06	60254272	Thu Sep 10 2020 14:35:42 GMT-0500 (CDT)	ltierney	research	41.9953	-91.672	Dumetella carolinensis	Gray Catbird	14995	Animalia	Chordata	Aves	Passeriformes	Mimidae	15T 609991.94mE 4650104.93mN
54	610275	4.65007e+06	59174118	2020-09-10 4:10:00 PM CDT	kalina_sq	research	41.9949	-91.6686	Contopus virens	Eastern Wood-Pewee	16100	Animalia	Chordata	Aves	Passeriformes	Tyrannidae	15T 610274.86mE 4650066.69mN
25	609984	4.65011e+06	33064803	Fri Sep 20 2019 09:11:51 GMT-0500 (CDT)	corvidologist	research	41.9953	-91.6721	Storeria dekayi	Dekay's Brownsnake	28562	Animalia	Chordata	Reptilia	Squamata	Colubridae	15T 609984.15mE 4650107.29mN
84	609790	4.65014e+06	64251311	Thu Nov 05 2020 13:06:32 GMT-0600 (CST)	samanthahernandez2	research	41.9956	-91.6744	Storeria dekayi	Dekay's Brownsnake	28562	Animalia	Chordata	Reptilia	Squamata	Colubridae	15T 609790.50mE 4650141.78mN
167	609899	4.65018e+06	81594022	2019/06/09 1:13 PM CDT	tod_kohl	research	41.996	-91.6731	Chelydra serpentina	Common Snapping Turtle	39682	Animalia	Chordata	Reptilia	Testudines	Chelydridae	15T 609898.85mE 4650179.47mN
121	609957	4.64964e+06	67870048	Sun Jan 10 2021 13:16:02 GMT-0600 (CST)	oviscanadensis_connerties	research	41.9911	-91.6725	Procyon lotor	Common Raccoon	41663	Animalia	Chordata	Mammalia	Carnivora	Procyonidae	15T 609957.41mE 4649642.57mN
28	609957	4.65002e+06	33858280	Fri Oct 04 2019 09:07:23 GMT-0500 (CDT)	corvidologist	research	41.9945	-91.6724	Odocoileus virginianus	White-tailed Deer	42223	Animalia	Chordata	Mammalia	Artiodactyla	Cervidae	15T 609956.93mE 4650019.77mN
32	609851	4.65013e+06	41758217	Mon Mar 20 2017 16:29:01 GMT-0500 (CDT)	melissodes	research	41.9955	-91.6737	Odocoileus virginianus	White-tailed Deer	42223	Animalia	Chordata	Mammalia	Artiodactyla	Cervidae	15T 609851.17mE 4650127.36mN
122	610552	4.64971e+06	67870148	Sun Jan 10 2021 12:18:25 GMT-0600 (CST)	oviscanadensis_connerties	research	41.9916	-91.6653	Odocoileus virginianus	White-tailed Deer	42223	Animalia	Chordata	Mammalia	Artiodactyla	Cervidae	15T 610551.83mE 4649707.53mN
142	609780	4.65001e+06	68500017	2021/01/21 4:00 PM CST	oviscanadensis_connerties	research	41.9944	-91.6746	Odocoileus virginianus	White-tailed Deer	42223	Animalia	Chordata	Mammalia	Artiodactyla	Cervidae	15T 609780.44mE 4650008.58mN
33	610048	4.6495e+06	41902685	Sat Apr 11 2020 08:50:04 GMT-0500 (CDT)	corvidologist	research	41.9898	-91.6714	Castor canadensis	American Beaver	43794	Animalia	Chordata	Mammalia	Rodentia	Castoridae	15T 610048.43mE 4649497.31mN
67	610301	4.65007e+06	59778141	2020-09-16 9:36:49 AM CDT	kasumi1	research	41.9949	-91.6683	Sciurus niger	Fox Squirrel	46020	Animalia	Chordata	Mammalia	Rodentia	Sciuridae	15T 610300.62mE 4650068.23mN
128	609773	4.65018e+06	67873980	2021/01/10 12:38 PM CST	oviscanadensis_connerties	research	41.996	-91.6746	Sciurus niger	Fox Squirrel	46020	Animalia	Chordata	Mammalia	Rodentia	Sciuridae	15T 609773.33mE 4650181.95mN
70	610311	4.65004e+06	61330765	Sun Sep 20 2020 08:13:54 GMT-0500 (CDT)	cptj4y	research	41.9947	-91.6682	Tamias striatus	Eastern Chipmunk	46217	Animalia	Chordata	Mammalia	Rodentia	Sciuridae	15T 610310.61mE 4650043.80mN
11	609898	4.64978e+06	29556994	2019/07/25 3:02 AM EDT	dean_hester	research	41.9924	-91.6732	Lotus corniculatus	bird's-foot trefoil	47435	Plantae	Tracheophyta	Magnoliopsida	Fabales	Fabaceae	15T 609897.76mE 4649778.37mN
41	609764	4.65008e+06	58453363	2020-09-03 3:35:52 PM CDT	kalina_sq	research	41.995	-91.6748	Lotus corniculatus	bird's-foot trefoil	47435	Plantae	Tracheophyta	Magnoliopsida	Fabales	Fabaceae	15T 609763.60mE 4650076.03mN
22	610320	4.65007e+06	32054541	Tue Sep 03 2019 10:24:07 GMT-0500 (CDT)	corvidologist	research	41.9949	-91.668	Impatiens capensis	common jewelweed	47888	Plantae	Tracheophyta	Magnoliopsida	Ericales	Balsaminaceae	15T 610320.30mE 4650068.72mN
16	610320	4.65007e+06	32053142	Tue Sep 03 2019 09:56:36 GMT-0500 (CDT)	corvidologist	research	41.9949	-91.668	Asclepias syriaca	common milkweed	47911	Plantae	Tracheophyta	Magnoliopsida	Gentianales	Apocynaceae	15T 610320.30mE 4650068.72mN
43	609778	4.65008e+06	58453645	2020-09-03 1:55:05 PM CDT	kalina_sq	research	41.9951	-91.6746	Harmonia axyridis	Asian Lady Beetle	48484	Animalia	Arthropoda	Insecta	Coleoptera	Coccinellidae	15T 609777.84mE 4650077.79mN
61	609998	4.6501e+06	59249057	2020/09/10 2:09 PM CDT	hbiegger	research	41.9953	-91.6719	Harmonia axyridis	Asian Lady Beetle	48484	Animalia	Arthropoda	Insecta	Coleoptera	Coccinellidae	15T 609997.67mE 4650103.72mN
65	610096	4.65008e+06	59479380	2020-09-13 1:47:37 PM CDT	robbie16	research	41.9951	-91.6707	Junonia coenia	Common Buckeye	48505	Animalia	Arthropoda	Insecta	Lepidoptera	Nymphalidae	15T 610096.04mE 4650083.15mN
7	609852	4.64989e+06	22898872	Mon Apr 22 2019 13:25:24 GMT-0500 (CDT)	corvidologist	research	41.9933	-91.6737	Vanessa virginiensis	American Lady	48549	Animalia	Arthropoda	Insecta	Lepidoptera	Nymphalidae	15T 609852.43mE 4649885.83mN
1	610574	4.64979e+06	854733	41881.7	lafrisch	research	41.9924	-91.665	Danaus plexippus	Monarch	48662	Animalia	Arthropoda	Insecta	Lepidoptera	Nymphalidae	15T 610573.99mE 4649790.09mN
42	609773	4.65009e+06	58453400	2020-09-03 2:29:51 PM CDT	kalina_sq	research	41.9952	-91.6746	Danaus plexippus	Monarch	48662	Animalia	Arthropoda	Insecta	Lepidoptera	Nymphalidae	15T 609773.31mE 4650087.90mN
24	610033	4.64997e+06	32890717	Tue Sep 17 2019 08:56:28 GMT-0500 (CDT)	corvidologist	research	41.9941	-91.6715	Phyciodes tharos	Pearl Crescent	52925	Animalia	Arthropoda	Insecta	Lepidoptera	Nymphalidae	15T 610032.74mE 4649971.17mN
73	609776	4.65012e+06	61331244	Wed Sep 16 2020 13:10:28 GMT-0500 (CDT)	cptj4y	research	41.9955	-91.6746	Phyciodes tharos	Pearl Crescent	52925	Animalia	Arthropoda	Insecta	Lepidoptera	Nymphalidae	15T 609775.97mE 4650124.35mN
45	609746	4.65016e+06	58476790	Thu Sep 03 2020 14:58:56 GMT-0500 (CDT)	sarahmoffett	research	41.9958	-91.6749	Cirsium vulgare	bull thistle	52989	Plantae	Tracheophyta	Magnoliopsida	Asterales	Asteraceae	15T 609745.88mE 4650160.43mN
64	609841	4.65012e+06	59479043	2020-09-13 12:49:03 PM CDT	robbie16	research	41.9955	-91.6738	Cirsium vulgare	bull thistle	52989	Plantae	Tracheophyta	Magnoliopsida	Asterales	Asteraceae	15T 609841.28mE 4650124.74mN
12	609906	4.64973e+06	29556997	2019/07/25 3:00 AM EDT	dean_hester	research	41.9919	-91.6731	Convolvulus arvensis	field bindweed	53021	Plantae	Tracheophyta	Magnoliopsida	Solanales	Convolvulaceae	15T 609905.66mE 4649727.13mN
2	610004	4.6501e+06	3835160	Mon Aug 08 2016 06:29:30 GMT-0500 (CDT)	balfour	research	41.9952	-91.6718	Oncopeltus fasciatus	Large Milkweed Bug	55556	Animalia	Arthropoda	Insecta	Hemiptera	Lygaeidae	15T 610003.92mE 4650098.63mN
14	609688	4.65027e+06	30345857	2019-08-06 8:17:24 PM CDT	robbie16	research	41.9968	-91.6756	Oncopeltus fasciatus	Large Milkweed Bug	55556	Animalia	Arthropoda	Insecta	Hemiptera	Lygaeidae	15T 609687.79mE 4650270.85mN
26	609823	4.65012e+06	33701249	Tue Oct 01 2019 09:31:20 GMT-0500 (CDT)	corvidologist	research	41.9954	-91.674	Promachus hinei		55773	Animalia	Arthropoda	Insecta	Diptera	Asilidae	15T 609823.39mE 4650120.45mN
9	609887	4.6498e+06	29556991	2019/07/25 3:06 AM EDT	dean_hester	research	41.9926	-91.6733	Saponaria officinalis	common soapwort	56154	Plantae	Tracheophyta	Magnoliopsida	Caryophyllales	Caryophyllaceae	15T 609886.57mE 4649803.94mN
27	610268	4.64994e+06	33858204	Fri Oct 04 2019 09:27:21 GMT-0500 (CDT)	corvidologist	research	41.9938	-91.6687	Pyrrharctia isabella	Isabella Tiger Moth	59675	Animalia	Arthropoda	Insecta	Lepidoptera	Erebidae	15T 610268.14mE 4649941.20mN
15	610186	4.65006e+06	30924612	Fri Aug 09 2019 14:20:53 GMT-0500 (CDT)	amanda_j_in_the_sun_all_day	research	41.9949	-91.6697	Lythrum salicaria	purple loosestrife	61321	Plantae	Tracheophyta	Magnoliopsida	Myrtales	Lythraceae	15T 610185.89mE 4650063.70mN
37	610259	4.65006e+06	58453004	2020-09-03 3:48:08 PM CDT	kalina_sq	research	41.9948	-91.6688	Lythrum salicaria	purple loosestrife	61321	Plantae	Tracheophyta	Magnoliopsida	Myrtales	Lythraceae	15T 610258.68mE 4650056.25mN
36	610099	4.65025e+06	56947306	2020-08-16 3:43:34 PM CDT	sadie1	research	41.9966	-91.6707	Tremex columba	Pigeon Tremex Horntail	63275	Animalia	Arthropoda	Insecta	Hymenoptera	Siricidae	15T 610098.72mE 4650251.70mN
66	610498	4.64949e+06	59773772	Wed Sep 16 2020 08:57:52 GMT-0500 (CDT)	corvidologist	research	41.9897	-91.666	Anaxyrus americanus	American Toad	64968	Animalia	Chordata	Amphibia	Anura	Bufonidae	15T 610498.38mE 4649491.07mN
4	610039	4.64954e+06	10138366	2011/07/06 2:37 PM CDT	rwheidt	research	41.9902	-91.6715	Neovison vison	American Mink	74758	Animalia	Chordata	Mammalia	Carnivora	Mustelidae	15T 610038.96mE 4649544.18mN
17	610320	4.65007e+06	32053767	Tue Sep 03 2019 10:09:05 GMT-0500 (CDT)	corvidologist	research	41.9949	-91.668	Catalpa speciosa	northern catalpa	76158	Plantae	Tracheophyta	Magnoliopsida	Lamiales	Bignoniaceae	15T 610320.30mE 4650068.72mN
34	609768	4.65013e+06	43935871	Mon Apr 27 2020 12:17:24 GMT-0500 (CDT)	corvidologist	research	41.9955	-91.6747	Pylodictis olivaris	Flathead Catfish	81552	Animalia	Chordata	Actinopterygii	Siluriformes	Ictaluridae	15T 609768.19mE 4650130.25mN
18	610320	4.65007e+06	32053803	Tue Sep 03 2019 10:10:10 GMT-0500 (CDT)	corvidologist	research	41.9949	-91.668	Elymus hystrix	bottlebrush grass	81594	Plantae	Tracheophyta	Liliopsida	Poales	Poaceae	15T 610320.30mE 4650068.72mN
19	609961	4.65008e+06	32053852	Tue Sep 03 2019 10:11:10 GMT-0500 (CDT)	corvidologist	research	41.9951	-91.6724	Silphium perfoliatum	cup plant	81599	Plantae	Tracheophyta	Magnoliopsida	Asterales	Asteraceae	15T 609961.39mE 4650080.99mN
35	610484	4.64939e+06	51576628	Wed Jul 01 2020 08:27:08 GMT-0500 (CDT)	m_____	research	41.9888	-91.6662	Sambucus canadensis	black elderberry	84300	Plantae	Tracheophyta	Magnoliopsida	Dipsacales	Viburnaceae	15T 610484.05mE 4649394.94mN
0	610581	4.64979e+06	854728	41881.6	lafrisch	research	41.9924	-91.6649	Haematopis grataria	Chickweed Geometer Moth	118490	Animalia	Arthropoda	Insecta	Lepidoptera	Geometridae	15T 610581.03mE 4649790.20mN
47	609763	4.65013e+06	58518607	2020/09/04 11:43 AM CDT	hbiegger	research	41.9955	-91.6747	Bombus impatiens	Common Eastern Bumble Bee	118970	Animalia	Arthropoda	Insecta	Hymenoptera	Apidae	15T 609763.29mE 4650125.38mN
62	610004	4.65011e+06	59249063	2020/09/10 2:32 PM CDT	hbiegger	research	41.9953	-91.6718	Ageratina altissima	white snakeroot	119048	Plantae	Tracheophyta	Magnoliopsida	Asterales	Asteraceae	15T 610003.77mE 4650110.91mN
6	610410	4.64938e+06	22898620	Mon Apr 22 2019 13:37:07 GMT-0500 (CDT)	corvidologist	research	41.9887	-91.6671	Bombus griseocollis	Brown-belted Bumble Bee	120215	Animalia	Arthropoda	Insecta	Hymenoptera	Apidae	15T 610410.32mE 4649377.15mN
10	610419	4.6494e+06	29556993	2019/07/25 3:05 AM EDT	dean_hester	research	41.9889	-91.667	Asclepias incarnata	swamp milkweed	125381	Plantae	Tracheophyta	Magnoliopsida	Gentianales	Apocynaceae	15T 610419.05mE 4649401.29mN
13	609959	4.64965e+06	29557748	2019/07/25 3:01 AM EDT	dean_hester	research	41.9912	-91.6725	Securigera varia	purple crownvetch	127186	Plantae	Tracheophyta	Magnoliopsida	Fabales	Fabaceae	15T 609959.37mE 4649648.88mN
21	609815	4.6499e+06	32054052	Tue Sep 03 2019 10:15:19 GMT-0500 (CDT)	corvidologist	research	41.9935	-91.6742	Ardea alba	Great Egret	144455	Animalia	Chordata	Aves	Pelecaniformes	Ardeidae	15T 609815.01mE 4649902.61mN
99	610699	4.64941e+06	64830773	2020/11/12 10:35 AM CST	oviscanadensis_connerties	research	41.9889	-91.6636	Leucophaeus pipixcan	Franklin's Gull	144515	Animalia	Chordata	Aves	Charadriiformes	Laridae	15T 610699.30mE 4649407.03mN
133	610140	4.64949e+06	67873987	2021/01/10 1:08 PM CST	oviscanadensis_connerties	research	41.9897	-91.6703	Poecile atricapillus	Black-capped Chickadee	144815	Animalia	Chordata	Aves	Passeriformes	Paridae	15T 610140.44mE 4649493.26mN
55	610275	4.65007e+06	59174171	2020-09-10 4:11:30 PM CDT	kalina_sq	research	41.9949	-91.6686	Setophaga fusca	Blackburnian Warbler	145237	Animalia	Chordata	Aves	Passeriformes	Parulidae	15T 610274.86mE 4650066.69mN
56	610275	4.65007e+06	59174375	2020-09-10 4:11:17 PM CDT	kalina_sq	research	41.9949	-91.6686	Setophaga pensylvanica	Chestnut-sided Warbler	145239	Animalia	Chordata	Aves	Passeriformes	Parulidae	15T 610274.86mE 4650066.69mN
90	610385	4.64936e+06	64830761	2020/11/12 9:44 AM CST	oviscanadensis_connerties	research	41.9885	-91.6674	Spinus tristis	American Goldfinch	145310	Animalia	Chordata	Aves	Passeriformes	Fringillidae	15T 610384.58mE 4649355.22mN
20	610320	4.65007e+06	32053883	Tue Sep 03 2019 10:12:03 GMT-0500 (CDT)	corvidologist	research	41.9949	-91.668	Rudbeckia subtomentosa	sweet black-eyed Susan	168207	Plantae	Tracheophyta	Magnoliopsida	Asterales	Asteraceae	15T 610320.30mE 4650068.72mN
8	610054	4.64951e+06	29556990	2019/07/25 4:04 AM EDT	dean_hester	research	41.9899	-91.6713	Silphium integrifolium	prairie rosinweed	168993	Plantae	Tracheophyta	Magnoliopsida	Asterales	Asteraceae	15T 610054.44mE 4649509.70mN
155	609945	4.64999e+06	71040471	2021/03/11 4:37 PM CST	oviscanadensis_connerties	research	41.9943	-91.6726	Larus argentatus	Herring Gull	204533	Animalia	Chordata	Aves	Charadriiformes	Laridae	15T 609945.43mE 4649992.87mN
23	609931	4.64957e+06	32054636	Tue Sep 03 2019 10:25:33 GMT-0500 (CDT)	corvidologist	research	41.9905	-91.6728	Hydrophilus triangularis	Giant Water Scavenger Beetle	221649	Animalia	Arthropoda	Insecta	Coleoptera	Hydrophilidae	15T 609930.68mE 4649572.48mN
140	609856	4.65004e+06	68389369	2021/01/20 3:41 PM CST	oviscanadensis_connerties	research	41.9947	-91.6736	Mareca americana	American Wigeon	485176	Animalia	Chordata	Aves	Anseriformes	Anatidae	15T 609855.88mE 4650043.30mN
131	609800	4.65008e+06	67873985	2021/01/10 12:59 PM CST	oviscanadensis_connerties	research	41.9951	-91.6743	Anser anser × Branta canadensis	Greylag × Canada Goose hybrid	514057	Animalia	Chordata	Aves	Anseriformes	Anatidae	15T 609800.42mE 4650084.13mN
101	610736	4.6495e+06	64830777	2020/11/12 10:50 AM CST	oviscanadensis_connerties	research	41.9897	-91.6631	Spatula clypeata	Northern Shoveler	558438	Animalia	Chordata	Aves	Anseriformes	Anatidae	15T 610736.17mE 4649495.70mN
159	609997	4.6501e+06	71447888	2021-03-17 3:35:08 PM CDT	kalina_sq	research	41.9952	-91.6719	Spatula clypeata	Northern Shoveler	558438	Animalia	Chordata	Aves	Anseriformes	Anatidae	15T 609997.28mE 4650099.09mN
164	610009	4.65009e+06	71522554	2021-03-18 6:19:30 PM CDT	kalina_sq	research	41.9951	-91.6718	Spatula clypeata	Northern Shoveler	558438	Animalia	Chordata	Aves	Anseriformes	Anatidae	15T 610008.93mE 4650089.70mN
88	610413	4649534	64830759	2020/11/12 9:39 AM CST	oviscanadensis_connerties	research	41.9901	-91.667	Oxyura jamaicensis	Ruddy Duck	850859	Animalia	Chordata	Aves	Anseriformes	Anatidae	15T 610412.73mE 4649534.00mN
96	610187	4.64977e+06	64830769	2020/11/12 10:03 AM CST	oviscanadensis_connerties	research	41.9923	-91.6697	Oxyura jamaicensis	Ruddy Duck	850859	Animalia	Chordata	Aves	Anseriformes	Anatidae	15T 610186.75mE 4649774.55mN
106	610341	4.64948e+06	65116797	2020/11/15 9:08 AM CST	oviscanadensis_connerties	research	41.9896	-91.6679	Oxyura jamaicensis	Ruddy Duck	850859	Animalia	Chordata	Aves	Anseriformes	Anatidae	15T 610341.20mE 4649477.17mN
115	610265	4.6495e+06	66026772	2020/11/26 11:07 AM CST	oviscanadensis_connerties	research	41.9898	-91.6688	Oxyura jamaicensis	Ruddy Duck	850859	Animalia	Chordata	Aves	Anseriformes	Anatidae	15T 610265.22mE 4649499.23mN
